# Supplementary material for: Argonaute 2 drives miR-145-5p-dependent gene expression program in breast cancer cells
Source: PubMed Central journal article supplement (PMC6325137; doi:10.1038/s41419-018-1267-5), 2019-01-08
Supplement: 41419_2018_1267_MOESM2_ESM.pdf [file 41419_2018_1267_MOESM2_ESM.pdf]

## Bellissimo et al. Supplementary Figure 2

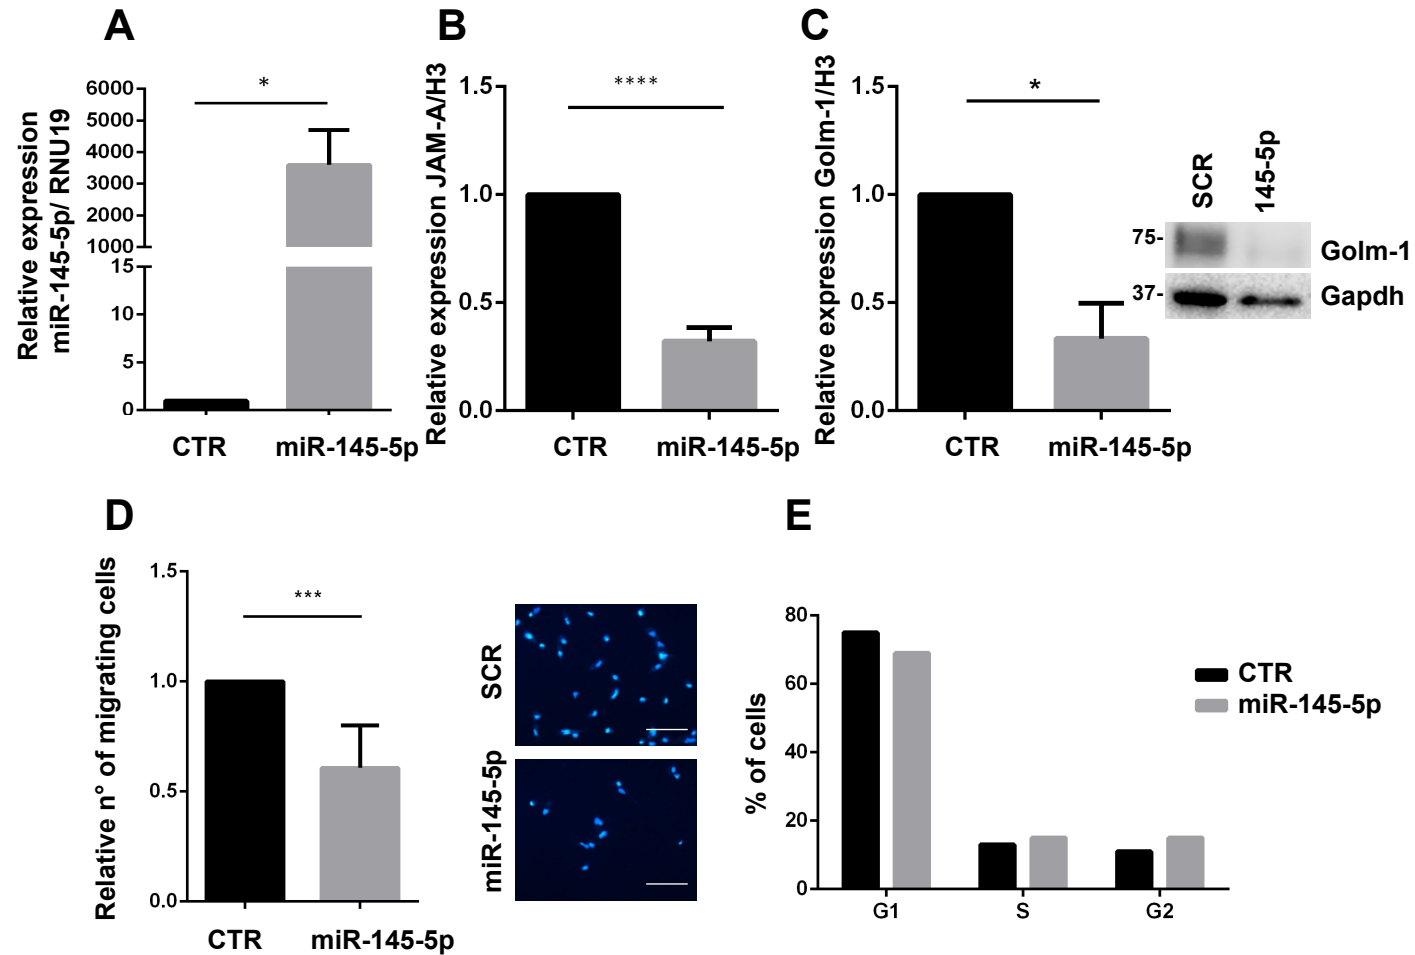

**Supplementary Figure 2: miR-145-5p expression impairs cell migration of MDA-MB-231 cells and inhibits Golm-1 protein:** RT-qPCR analysis to evaluate miR-145-5p (A), JAM-A (B) and Golm-1 (C) expression upon 48h of miR-145-5p transfection; (C) Right panel shows western blotting to examine Golm-1 protein after 48h of miR-145-5p overexpression; (D) Transwell migration assay showing a reduction of migratory properties upon 48h of miR-145-5p overexpression (Scale bars, 100 μm) and (E) FACS analysis of cell cycle performed following 48h of miR-145-5p ectopic expression.
