# Supplementary material for: Argonaute 2 drives miR-145-5p-dependent gene expression program in breast cancer cells
Source: PubMed Central journal article supplement (PMC6325137; doi:10.1038/s41419-018-1267-5), 2019-01-08
Supplement: 41419_2018_1267_MOESM3_ESM.pdf [file 41419_2018_1267_MOESM3_ESM.pdf]

# Bellissimo et al. Supplementary Figure 3

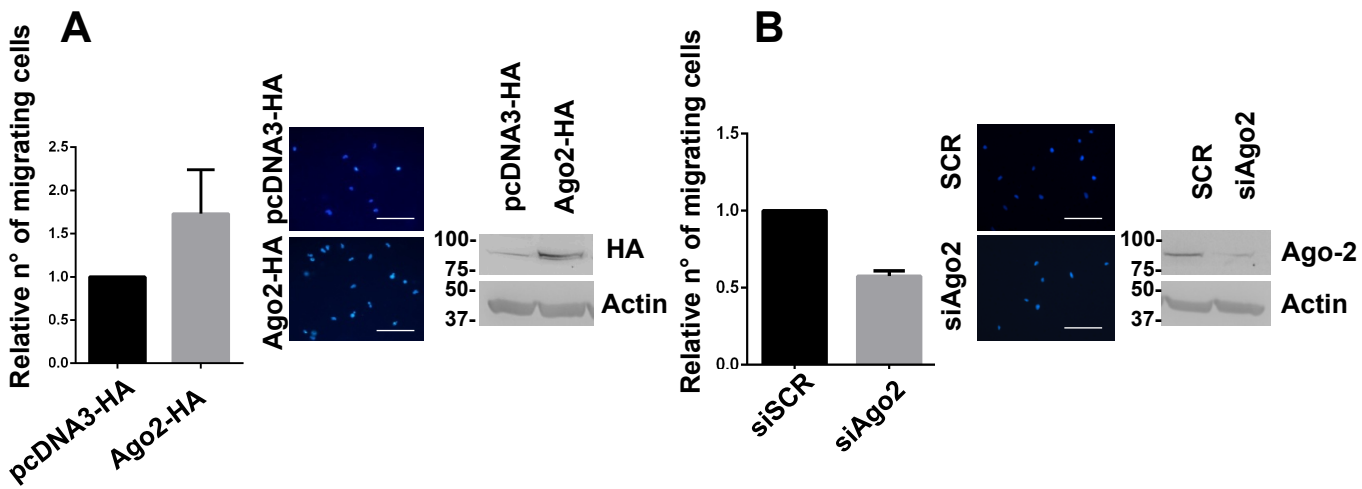

**Supplementary Figure 3: miR-145-5p overexpression inhibits migration with the contribution of Ago2:** (A) Transwell migration assay showing an increase of MDA-MB-231 migratory properties upon 72h of Ago2-HA overexpression and relative images (left panel) (Scale bars, 100  $\mu$ m); western blot analysis of Ago2-HA in the same condition (right panel); (B) Transwell assay showing a reduction of migratory properties after Ago2 silencing with relative images (left panel) (Scale bars, 100  $\mu$ m); western blot analysis performed upon 72h of Ago2 RNA interference (right panel);
