# Supplementary material for: Argonaute 2 drives miR-145-5p-dependent gene expression program in breast cancer cells
Source: PubMed Central journal article supplement (PMC6325137; doi:10.1038/s41419-018-1267-5), 2019-01-08
Supplement: 41419_2018_1267_MOESM4_ESM.pdf [file 41419_2018_1267_MOESM4_ESM.pdf]

## Bellissimo et al. Supplementary Figure 4

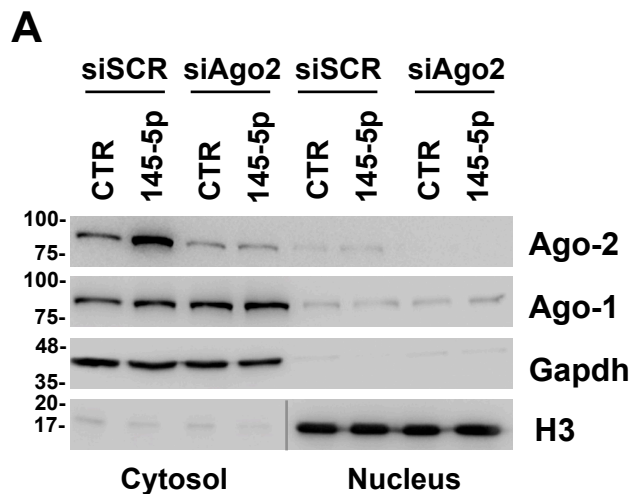

**Supplementary Figure 4:** Western blot analysis to determine Ago2 and Ago1 localization in MDA-MB-231 cells transfected for 48h with SCR-control mimic, SCR-miR-145-5p, in sample silenced for Ago2 (siAgo2) and in sample overexpressing miR-145-5p and silenced for Ago2 (siAgo2-145-5p). Equal amounts (40 $\mu$ g) of cytoplasmic fractions and nuclear fractions from each sample were analyzed. Gapdh and Histone H3 were used as markers of the cytoplasmic and nuclear fraction, respectively.
