# Supplementary material for: Argonaute 2 drives miR-145-5p-dependent gene expression program in breast cancer cells
Source: PubMed Central journal article supplement (PMC6325137; doi:10.1038/s41419-018-1267-5), 2019-01-08
Supplement: 41419_2018_1267_MOESM5_ESM.pdf [file 41419_2018_1267_MOESM5_ESM.pdf]

## Bellissimo et al. Supplementary Figure 5

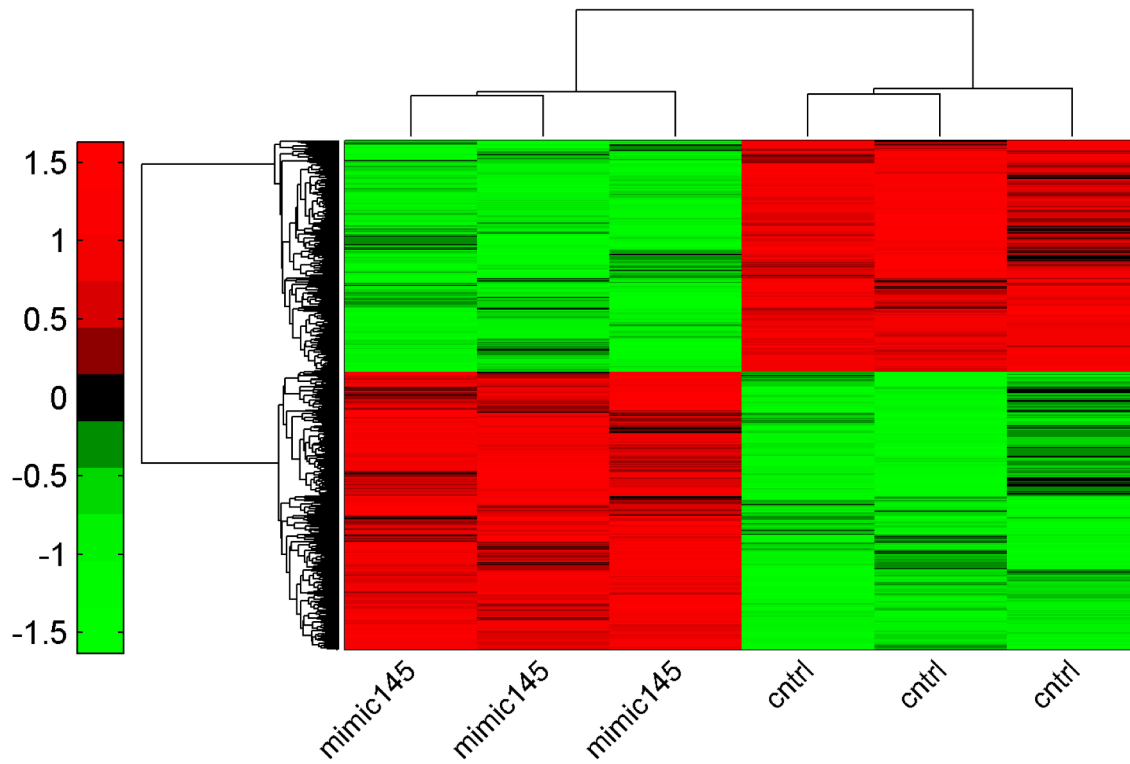

**Supplementary Figure 5.** Expression matrix of genes modulated by miR-145-5p expression in MDA-MB-231 cells.
