# Supplementary material for: Argonaute 2 drives miR-145-5p-dependent gene expression program in breast cancer cells
Source: PubMed Central journal article supplement (PMC6325137; doi:10.1038/s41419-018-1267-5), 2019-01-08
Supplement: 41419_2018_1267_MOESM6_ESM.pdf [file 41419_2018_1267_MOESM6_ESM.pdf]

# Bellissimo et al. Supplementary Figure 6

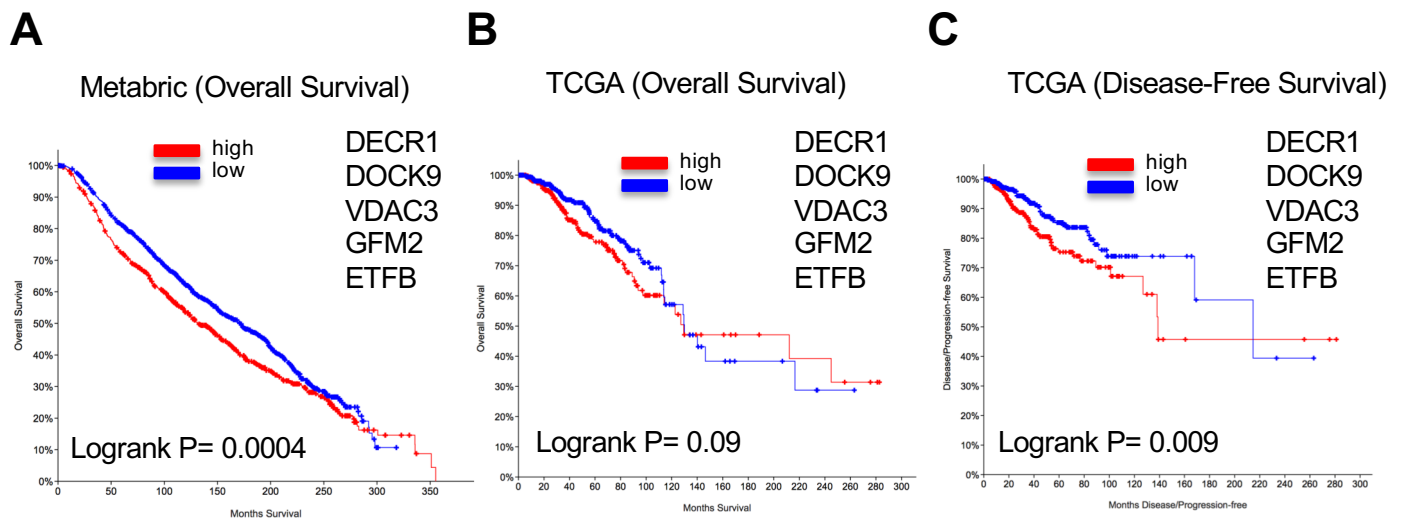

## D

5-genes expression (TCGA cohort, RNA-seq data)

| Gene A | Gene B | Log Odds Ratio | p-Value | Adjusted p-Value | Tendency      |
|--------|--------|----------------|---------|------------------|---------------|
| DECR1  | VDAC3  | 1.280          | <0.001  | <0.001           | Co-occurrence |
| DOCK9  | ETFB   | 1.842          | <0.001  | 0.001            | Co-occurrence |
| DECR1  | ETFB   | 1.119          | 0.002   | 0.019            | Co-occurrence |

**Supplementary Figure 6.** (A-C) Kaplan Meier analysis to evaluate the predictive power of a signature comprising the 5 top downregulated genes of miR-145-5p (DECR1, GFM2, DOCK9, VDAC3, ETFB) has been performed on the Metabric (A) and the TCGA (B-C) datasets using cBioPortal database. (D) Co-occurrence analysis has been performed considering the overexpression of the 5 top miR-145-5p-dependent downregulated genes on the TCGA dataset using the cBioPortal cancer genomics database.
