# Supplementary material for: Argonaute 2 drives miR-145-5p-dependent gene expression program in breast cancer cells
Source: PubMed Central journal article supplement (PMC6325137; doi:10.1038/s41419-018-1267-5), 2019-01-08
Supplement: 41419_2018_1267_MOESM7_ESM.pdf [file 41419_2018_1267_MOESM7_ESM.pdf]

| entrezID  | permutation p | ttest p    | FDR         | log2fold          | mean mimic145 | mean cntrl  | pval(4Vs3) | log2fold(4Vs3) | pval(3Vs1)  | log2fold(3Vs1) | gene      | name           | locus group | locus type | ensembleID               |                      |                      |
|-----------|---------------|------------|-------------|-------------------|---------------|-------------|------------|----------------|-------------|----------------|-----------|----------------|-------------|------------|--------------------------|----------------------|----------------------|
| 64853     | 1,80966E-14   | 4,8739E-07 | 0,006036748 | <b>1,0690809</b>  | 9,744469551   | 8,675388659 | 0,008328   | 0,527222808    | 0,013484073 | 0,669452166    | AIDA      | dorsalizing    | coding      | th         | protein G00000186063     |                      |                      |
| 92856     | 5,42819E-06   | 2,0216E-06 | 0,012519664 | <b>0,6536883</b>  | 10,87239204   | 10,21870372 | 0,413675   | -0,09494756    | 0,019960798 | 0,355294221    | IMP4      | nall nucleosin | coding      | th         | protein G00000136718     |                      |                      |
| 344558    | 1,08498E-05   | 7,9431E-06 | 0,032794484 | <b>0,851205</b>   | 7,45589905    | 6,606490458 | 0,172002   | 0,213729243    | 0,206225881 | 0,167405197    | SH3RF3    | containingin   | coding      | th         | protein G00000129855     |                      |                      |
| 54799     | 3,87828E-05   | 1,2347E-05 | 0,030585766 | <b>-0,5463262</b> | 6,516832109   | 7,063194001 | 0,116897   | -0,254547105   | 0,023164232 | -0,067187855   | MBTD1     | main contain   | coding      | th         | protein G00000011258     |                      |                      |
| 11160     | 6,50576E-05   | 1,4937E-05 | 0,030835572 | <b>1,106274</b>   | 8,091065895   | 6,984791849 | 0,001276   | 0,656956972    | 0,011967376 | -0,349357302   | ERLIN2    | raft associn   | coding      | th         | protein G00000147475     |                      |                      |
| 122970    | 6,91305E-05   | 1,6435E-05 | 0,029080356 | <b>-0,890693</b>  | 7,848690182   | 8,73938324  | 0,35677    | -0,207046271   | 0,01439078  | -0,646203723   | ACOT4     | oA thioestein  | coding      | th         | protein G00000177465     |                      |                      |
| 867       | 0,000113245   | 3,081E-05  | 0,047702048 | <b>0,5510886</b>  | 8,33135129    | 7,780262652 | 0,014035   | 0,286007934    | 0,001856589 | 0,3667506      | CBL       | roto-oncopin   | coding      | th         | protein G00000110395     |                      |                      |
| 1009      | 0,000118274   | 3,1221E-05 | 0,042966673 | <b>1,0745267</b>  | 9,379078383   | 8,304551715 | 0,008513   | 0,516846657    | 0,061294095 | -0,208969776   | CDH11     | adherin 1      | in          | coding     | th                       | protein G00000140937 |                      |
| 90411     | 0,00010648    | 3,2344E-05 | 0,040060929 | <b>0,9660915</b>  | 12,65783058   | 11,69173906 | 0,003747   | 0,547741598    | 0,049752616 | 0,230262658    | MCFD2     | ilation fact   | in          | coding     | th                       | protein G00000180398 |                      |
| 677781    | 0,000170735   | 4,1414E-05 | 0,04663175  | <b>-1,602544</b>  | 8,392339716   | 9,994883481 | 0,091984   | -1,304765538   | 0,044763999 | -0,356715131   | SCARNA16  | body-specn     | coding      | Ri         | small nuclG00000275143   |                      |                      |
| 146691    | 9,66341E-05   | 4,4828E-05 | 0,046270054 | <b>0,5901022</b>  | 7,41568783    | 6,825585673 | 0,013894   | 0,356946771    | 0,086378133 | 0,18127576     | TOM1L2    | membran        | in          | coding     | th                       | protein G00000175662 |                      |
| 1666      | 0,00017749    | 4,5959E-05 | 0,043788298 | <b>-1,051175</b>  | 10,0491848    | 11,10035965 | 0,342762   | -0,117292224   | 0,169256731 | -0,192343415   | DECR1     | reductase      | in          | coding     | th                       | protein G00000104325 |                      |
| 200014    | 0,000187068   | 7,0192E-05 | 0,06209937  | <b>-0,803791</b>  | 6,548800443   | 7,388591756 | 0,000484   | -0,567035935   | 0,088038254 | -0,113021392   | CC2D1B    | C2 domain      | in          | coding     | th                       | protein G00000154222 |                      |
| 4490      | 0,00027885    | 7,2396E-05 | 0,059779368 | <b>-0,860305</b>  | 13,19954546   | 14,05985026 | 0,054713   | -0,502111239   | 0,118173373 | -0,140603217   | MT1B      | allothionein   | in          | coding     | th                       | protein G00000169688 |                      |
| 9891      | 0,00019928    | 7,2856E-05 | 0,056399842 | <b>-1,437908</b>  | 6,475764638   | 7,913684638 | 0,009987   | -0,899260588   | 0,053488265 | -0,329976092   | NUAK1     | family kascin  | coding      | th         | protein G00000074590     |                      |                      |
| 84340     | 0,000182787   | 7,9203E-05 | 0,057706332 | <b>-0,70347</b>   | 7,033423493   | 7,736893866 | 0,066762   | -0,234845231   | 0,129354577 | -0,17839369    | GFM2      | factor mit     | in          | coding     | th                       | protein G00000164347 |                      |
| 401236    | 0,000228874   | 8,1822E-05 | 0,056302451 | <b>1,5767957</b>  | 3,775102832   | 2,198307086 | 0,623548   | -0,298032729   | 0,013493069 | 1,299852443    | STMND1    | domain co      | in          | coding     | th                       | protein G00000230873 |                      |
| 4697      | 0,000320095   | 9,6507E-05 | 0,062911993 | <b>-1,237635</b>  | 12,6425898    | 13,88022434 | 0,003033   | -0,865238309   | 0,054779395 | -0,221521128   | NDUFA4    | ondrial co     | in          | coding     | th                       | protein G00000189043 |                      |
| 4500      | 0,00035398    | 0,00011363 | 0,07037058  | <b>-0,809473</b>  | 12,68050011   | 13,48997327 | 0,083062   | -0,670008293   | 0,087691415 | -0,302673859   | MT1L      | in 1L (gene    | in          | coding     | th                       | protein G00000260549 |                      |
| 728568    | 0,00014943    | 0,00011948 | 0,067267801 | <b>1,0806168</b>  | 8,758899013   | 7,678282173 | 0,001988   | 0,836105395    | 0,207225969 | 0,143986778    | C12orf73  | l2 open re     | in          | coding     | th                       | protein G00000204954 |                      |
| 112950    | 0,000383083   | 0,00013795 | 0,074290067 | <b>0,6352079</b>  | 10,65141809   | 10,0162102  | 0,003119   | -0,261432914   | 0,010453421 | 0,179334887    | MED8      | r complex      | in          | coding     | th                       | protein G00000159479 |                      |
| 79102     | 0,000122731   | 0,00018066 | 0,089506277 | <b>0,624286</b>   | 13,23179547   | 12,60750946 | 0,130032   | 0,215619484    | 0,279622575 | 0,133623835    | RNF26     | inger prote    | in          | coding     | th                       | protein G00000173456 |                      |
| 55604     | 0,000336934   | 0,00020182 | 0,092584545 | <b>-0,857946</b>  | 7,291072926   | 8,149074799 | 0,037819   | -0,435617487   | 0,000684637 | -0,778703416   | CARMIL1   | gulator on     | in          | coding     | th                       | protein G00000076691 |                      |
| 6322      | 0,000219327   | 0,00020668 | 0,088272448 | <b>1,8683433</b>  | 9,692422078   | 7,824078786 | 0,004009   | 0,929552913    | 0,081514525 | 0,337257666    | SCML1     | midleg-like    | in          | coding     | th                       | protein G00000047634 |                      |
| 11282     | 4,2861E-05    | 0,00021189 | 0,087480653 | <b>-1,319132</b>  | 9,754964283   | 11,07409617 | 0,026398   | -0,690483514   | 0,009831913 | -0,302069101   | MGAT4B    | a-1,4-N-ac     | in          | coding     | th                       | protein G00000161013 |                      |
| 56925     | 0,000284311   | 0,00021428 | 0,085613882 | <b>-1,856245</b>  | 7,04142623    | 8,897670828 | 0,004829   | -0,486801451   | 0,005678941 | -0,445257597   | LXN       | laxin          | in          | coding     | th                       | protein G00000079257 |                      |
| 9353      | 0,000388886   | 0,00021436 | 0,082971861 | <b>1,0402391</b>  | 7,038838529   | 5,998599385 | 0,002749   | 0,605526584    | 0,687731391 | 0,036936113    | SLIT2     | uidance lig    | in          | coding     | th                       | protein G00000145147 |                      |
| 23348     | 0,000145369   | 0,00025259 | 0,089388272 | <b>-0,928181</b>  | 8,212417404   | 9,140598041 | 0,47156    | -0,13228974    | 0,433558265 | 0,093649038    | DOCK9     | or of cyto     | in          | coding     | th                       | protein G00000088387 |                      |
| 7419      | 0,000406095   | 0,00027545 | 0,092208565 | <b>-0,544813</b>  | 10,00969657   | 9,464883801 | 0,391309   | -0,098452075   | 0,609383145 | -0,046956507   | VDAC3     | ndent ane      | in          | coding     | th                       | protein G00000078668 |                      |
| 5704      | 0,000459302   | 0,00030812 | 0,088754028 | <b>0,5363499</b>  | 10,74757497   | 10,21122503 | 0,012908   | 0,163850138    | 0,015642404 | 0,174327821    | PSMC4     | 26S sub        | in          | coding     | th                       | protein G00000013275 |                      |
| 22845     | 0,000367613   | 0,00030949 | 0,087121213 | <b>0,7327117</b>  | 11,17956815   | 10,44685649 | 0,199537   | 0,164313928    | 0,017814951 | 0,36183591     | DOLK      | lichol kin     | in          | coding     | th                       | protein G00000175283 |                      |
| 340581    | 0,000610354   | 0,00031874 | 0,087731634 | <b>-2,162875</b>  | 3,590916213   | 5,753791577 | 0,638283   | -0,365571254   | 0,131929283 | -1,501374634   |           |                |             |            |                          |                      |                      |
| 9526      | 0,000411024   | 0,00032186 | 0,086663851 | <b>-0,686286</b>  | 8,937890158   | 9,624176169 | 0,233135   | -0,209274095   | 0,302528672 | 0,142590374    | MPDU1     | lichol util    | in          | coding     | th                       | protein G00000129255 |                      |
| 2109      | 0,000485857   | 0,0003236  | 0,08527787  | <b>-0,815459</b>  | 9,554582156   | 10,37004074 | 0,14473    | -0,168074741   | 0,302164616 | -0,107086535   | ETFB      | r flavopro     | in          | coding     | th                       | protein G00000105379 |                      |
| 55571     | 0,000732347   | 0,0003237  | 0,083526725 | <b>0,6945759</b>  | 8,844042038   | 8,14946617  | 0,41868    | 0,183095881    | 0,024344981 | 0,398474124    | CNOT11    | ription co     | in          | coding     | th                       | protein G00000158435 |                      |
| 11098     | 0,00075792    | 0,00032431 | 0,081976957 | <b>-0,970426</b>  | 9,380956797   | 10,35138267 | 0,412775   | -0,14964919    | 0,035068504 | -0,469108945   | PRSS23    | ease, serin    | in          | coding     | th                       | protein G00000150687 |                      |
| 51107     | 0,000400382   | 0,0003319  | 0,082218226 | <b>-1,223643</b>  | 8,402638814   | 9,626281864 | 0,020676   | -0,656691504   | 0,41410726  | -0,088998667   | APH1A     | gamma-s        | in          | coding     | th                       | protein G00000117362 |                      |
| 54952     | 0,000646177   | 0,00033507 | 0,081375893 | <b>-0,755487</b>  | 8,462255227   | 9,217741795 | 0,064174   | -0,375761877   | 0,065128455 | -0,390548718   | TRNAU1A   | Peine 1        | asc         | in         | coding                   | th                   | protein G00000180098 |
| 28327     | 0,000669077   | 0,00034695 | 0,081080911 | <b>0,5831423</b>  | 10,40103379   | 9,71891358  | 0,071845   | 0,295758947    | 0,691156379 | -0,025241105   | TTC9C     | ptide repe     | in          | coding     | th                       | protein G00000162222 |                      |
| 25923     | 0,000733392   | 0,00034894 | 0,080036883 | <b>0,6579541</b>  | 9,864355178   | 9,206401121 | 0,004281   | 0,544793986    | 0,220711527 | -0,115335796   | ATL3      | stin GTP       | in          | coding     | th                       | protein G00000184743 |                      |
| 8863      | 0,000449075   | 0,00035312 | 0,079522485 | <b>-0,51484</b>   | 6,882687758   | 7,397527403 | 0,206783   | -0,218341358   | 0,379840917 | 0,135839177    | PER3      | ircadian       | in          | coding     | th                       | protein G00000049246 |                      |
| 4493      | 0,000566529   | 0,00038634 | 0,085450056 | <b>-1,219714</b>  | 12,64025105   | 13,85996529 | 0,073336   | -0,685154595   | 0,588298999 | -0,053586048   | MT1E      | allothione     | in          | coding     | th                       | protein G00000169715 |                      |
| 3281      | 0,000193673   | 0,00038832 | 0,0843806   | <b>-1,107757</b>  | 10,18105528   | 11,28881251 | 0,732E-05  | -0,318249538   | 0,002944522 | -0,252983882   | HSBP1     | actor bindi    | in          | coding     | th                       | protein G00000230989 |                      |
| 55855     | 0,000887321   | 0,00038975 | 0,083230712 | <b>-0,964407</b>  | 8,481840415   | 9,446247135 | 0,000477   | -0,813956825   | 0,03589794  | -0,235921888   | FAM45BP   | ilarity 45     | seudogen    | in         | coding                   | th                   | protein G00000221930 |
| 100506328 | 0,0007889     | 0,00042095 | 0,088369724 | <b>2,6023519</b>  | 2,739951205   | 0,13759226  | 0,494653   | 1,044723952    | 0,487317116 | 0,75942877     | LINC01127 | on-protein     | n           | coding     | Rilong non-cG00000081162 |                      |                      |
| 93408     | 0,000985855   | 0,00042197 | 0,087106881 | <b>1,0119048</b>  | 8,129573763   | 7,117669012 | 0,155838   | 0,570039059    | 0,372995189 | -0,107136867   | MYL10     | in light       | in          | coding     | th                       | protein G00000106436 |                      |
| 3655      | 0,000854751   | 0,00042966 | 0,087242523 | <b>0,8389947</b>  | 10,58016174   | 9,741166993 | 0,098983   | 0,197255259    | 0,000311227 | 0,738633907    | ITGA6     | n subunit      | in          | coding     | th                       | protein G00000091409 |                      |
| 221908    | 0,000156296   | 0,00043588 | 0,087076403 | <b>0,509604</b>   | 11,1269474    | 10,6173434  | 0,594682   | 0,075657034    | 0,159632806 | 0,21771308     | PPP1R35   | tase 1         | regul       | in         | coding                   | th                   | protein G00000160813 |
| 23286     | 0,001031572   | 0,00045434 | 0,089325259 | <b>-0,619053</b>  | 7,841626872   | 8,460680205 | 0,023265   | -0,3737894     | 0,02681468  | -0,241456778   | WWC1      | 2 domain       | in          | coding     | th                       | protein G00000113645 |                      |
| 8470      | 0,000574635   | 0,00045452 | 0,087964022 | <b>-1,352434</b>  | 9,518881391   | 7,271315836 | 0,137075   | -0,411592351   | 0,000616293 | -0,914769127   | SORBS2    | H3 domain      | in          | coding     | th                       | protein G00000154556 |                      |
| 9306      | 0,001006328   | 0,00045651 | 0,086988949 | <b>0,7899919</b>  | 6,92412343    | 6,134131501 | 0,06463    | 0,             |             |                |           |                |             |            |                          |                      |                      |

|           |             |            |             |           |              |              |          |              |             |              |           |                                                                    |
|-----------|-------------|------------|-------------|-----------|--------------|--------------|----------|--------------|-------------|--------------|-----------|--------------------------------------------------------------------|
| 23250     | 0,001048208 | 0,0005727  | 0,097170299 | -0,854036 | 7,070970511  | 7,925006256  | 0,02074  | -0,515006094 | 0,29206751  | -0,130411018 | ATP11A    | pholipid tra <sup>in</sup> -coding, th protein G00000068650        |
| 91664     | 0,001261808 | 0,00059319 | 0,099287233 | -0,744632 | 7,622789131  | 8,36742102   | 0,478489 | -0,070304809 | 0,062469045 | -0,213798154 | ZNF845    | nger prote <sup>in</sup> -coding, th protein G00000213799          |
| 116832    | 0,000692968 | 0,00060942 | 0,100644115 | -0,999357 | 9,994132206  | 10,99348891  | 0,022965 | -0,632084486 | 0,062320146 | 0,216949867  | RPL39L    | al protein <sup>in</sup> -coding, th protein G00000163923          |
| 79932     | 0,001305373 | 0,00061345 | 0,09997637  | -0,743984 | 7,464016196  | 8,208000176  | 0,0145   | -0,572075065 | 0,061923655 | -0,191139739 | KIAA0319L | IAA0319LAA0319 like <sup>in</sup> -coding, th protein G00000146687 |
| 1200      | 0,00049088  | 0,00061703 | 0,097981346 | -0,532081 | 8,219931941  | 8,752013432  | 0,202886 | 0,075063117  | 0,010023654 | -0,292434597 | TPP1      | tidyl peptid <sup>in</sup> -coding, th protein G00000126340        |
| 6774      | 0,001318504 | 0,00062909 | 0,098631738 | 0,9242249 | 9,440853078  | 8,516628215  | 0,00918  | 0,967958218  | 0,501623572 | -0,053547351 | STAT3     | nd activat <sup>in</sup> -coding, th protein G00000168610          |
| 401509    | 0,001105087 | 0,0006465  | 0,100093273 | -0,895802 | 5,744474259  | 6,640276416  | 0,233313 | -1,063548271 | 0,10762045  | -0,348521567 | ZNF658B   | stein 658B <sup>seudogen</sup> seudogenG00000198416                |
| 5303      | 0,001363685 | 0,00068194 | 0,104277469 | -0,893116 | 7,566445881  | 6,673329774  | 0,039727 | -0,730863408 | 0,091319892 | -0,176277602 | PIN4      | is isomer <sup>in</sup> -coding, th protein G00000102309           |
| 92675     | 0,00071432  | 0,00068837 | 0,103977739 | -1,838309 | 8,731795311  | 10,57010385  | 0,002487 | -1,44294561  | 0,853936305 | -0,017380196 | DTD1      | l-tRNA de <sup>in</sup> -coding, th protein G00000125821           |
| 9542      | 0,000832077 | 0,00069661 | 0,1039539   | 0,8660841 | 5,667275609  | 4,801191503  | 0,154629 | 0,41659189   | 0,298378567 | 0,26273894   | NRG2      | reuregulin <sup>in</sup> -coding, th protein G00000158458          |
| 3126      | 0,000506233 | 0,00070674 | 0,104210557 | -1,120484 | 9,833442347  | 10,95392654  | 0,105383 | -0,273565399 | 0,001553564 | -0,76972049  | HLA-DRB4  | ility compl <sup>in</sup> -coding, th protein G00000227357         |
| 1907      | 0,000582271 | 0,00071332 | 0,103943152 | -0,966993 | 7,4966650521 | 8,463643313  | 0,100876 | -0,323659528 | 0,007177912 | -0,719726752 | EDN2      | ndothelin <sup>in</sup> -coding, th protein G00000127129           |
| 116841    | 0,001089942 | 0,00072501 | 0,10441814  | -0,706575 | 7,631914565  | 8,338489107  | 0,560535 | -0,199782541 | 0,387891931 | -0,265251748 | SNAP47    | e associat <sup>in</sup> -coding, th protein G00000143740          |
| 90861     | 0,00138571  | 0,000754   | 0,106125477 | -0,573125 | 9,768687029  | 10,34181234  | 0,039148 | -0,215749383 | 0,049028638 | -0,180370085 | HN1L      | neurologic <sup>in</sup> -coding, th protein G00000206053          |
| 9813      | 0,000607981 | 0,0007602  | 0,105796195 | 0,7337374 | 9,631493008  | 8,89775563   | 0,180489 | 0,322138086  | 0,041763278 | 0,352796125  | EFCAB14   | ium bindin <sup>in</sup> -coding, th protein G00000159658          |
| 56477     | 0,000430725 | 0,00076069 | 0,10468785  | -1,900598 | 5,524910467  | 7,4254910841 | 0,097331 | -1,028305579 | 0,011013745 | -0,428559278 | CL28      | chemokine <sup>in</sup> -coding, th protein G00000151882           |
| 4860      | 0,001329917 | 0,00076335 | 0,103898609 | 0,7181127 | 10,49089917  | 9,772786513  | 0,002363 | 0,474870129  | 0,01766958  | 0,293445718  | PNP       | leoside phe <sup>in</sup> -coding, th protein G00000198805         |
| 729515    | 9,17244E-05 | 0,00076784 | 0,10337365  | -0,603393 | 6,74940688   | 7,352800187  | 0,039346 | -0,607631847 | 0,765973643 | 0,033151577  | TMEM242   | mbrane pre <sup>in</sup> -coding, th protein G00000215712          |
| 23516     | 0,001296628 | 0,00080436 | 0,107127213 | 1,0166193 | 8,171146396  | 7,154527134  | 0,453855 | 0,242172401  | 0,053572842 | 0,649772335  | SLC39A14  | r family 39 <sup>in</sup> -coding, th protein G00000104635         |
| 283254    | 0,001325259 | 0,00083544 | 0,108923716 | 0,5774595 | 7,007928221  | 6,430468671  | 0,525679 | 0,106180858  | 0,442745407 | 0,075986223  | HARB1     | ransposas <sup>in</sup> -coding, th protein G00000180423           |
| 5471      | 0,001514075 | 0,00085104 | 0,108669142 | 0,6639508 | 8,924607882  | 8,26065711   | 0,037417 | 0,203716903  | 0,001606972 | 0,486559874  | PPAT      | ophosphat <sup>in</sup> -coding, th protein G00000128059           |
| 4066      | 0,000826861 | 0,00085297 | 0,107804604 | 0,5515104 | 7,078331493  | 6,526821104  | 0,013004 | 0,456385787  | 0,867951014 | -0,011173219 | LYL1      | loop-helix <sup>in</sup> -coding, th protein G00000104903          |
| 51725     | 0,000165198 | 0,00085345 | 0,106775917 | 1,7017331 | 4,504691998  | 2,802958945  | 0,521332 | -0,344506594 | 0,047958933 | 1,40040964   | FBX040    | ox protein <sup>in</sup> -coding, th protein G00000163833          |
| 285704    | 0,001622387 | 0,00085754 | 0,106214058 | 0,7464901 | 8,816637349  | 8,070147247  | 0,545936 | 0,093017594  | 0,207139329 | 0,211563428  | RGMB      | e molecule <sup>in</sup> -coding, th protein G00000174136          |
| 11212     | 0,0011631   | 0,00086602 | 0,106203095 | 0,6757301 | 7,292675485  | 6,616945417  | 0,013338 | 0,455082606  | 0,034685146 | 0,235647567  | PROSC     | ranscrib <sup>in</sup> -coding, th protein G00000147471            |
| 638       | 0,001158344 | 0,00088145 | 0,105996582 | -1,242488 | 7,527362322  | 6,769850305  | 0,04392  | -0,326548436 | 0,028404477 | -0,448880234 | BIK       | interactin <sup>in</sup> -coding, th protein G00000100290          |
| 149371    | 0,000241417 | 0,00090397 | 0,10765919  | -0,523004 | 7,538306372  | 8,061310532  | 0,204774 | -0,281600535 | 0,0877999   | 0,024292876  | EXOC8     | mplex con <sup>in</sup> -coding, th protein G00000116903           |
| 26130     | 0,001693959 | 0,00090967 | 0,107305618 | 0,673947  | 9,016906962  | 8,342959925  | 0,163292 | 0,199168003  | 0,087240446 | 0,252230973  | GAPVD1    | rotein an <sup>in</sup> -coding, th protein G00000165219           |
| 387522    | 0,001680752 | 0,00091652 | 0,107093921 | 1,5108658 | 11,82180705  | 10,31094123  | 0,018955 | 1,154912794  | 0,100971142 | 0,348651753  | M189-UBE  | UBE2V1 re other eadthrougG00000124208                              |
| 5202      | 0,001285874 | 0,00092316 | 0,106862019 | 0,6315465 | 13,42583686  | 12,79429035  | 0,046523 | 0,21599465   | 0,004027864 | 0,339849835  | PFDN2     | oldin sub <sup>in</sup> -coding, th protein G00000143256           |
| 84572     | 0,001668315 | 0,00096458 | 0,108611266 | -0,583139 | 9,524709215  | 10,10784803  | 0,11445  | -0,413169166 | 0,01112823  | -0,244536011 | GNPTG     | osphate tra <sup>in</sup> -coding, th protein G00000090581         |
| 7694      | 0,001692389 | 0,00096547 | 0,107732258 | 0,5882839 | 5,813425866  | 5,225141997  | 0,255732 | 0,774192545  | 0,707000563 | 0,045322699  | ZNF135    | nger prote <sup>in</sup> -coding, th protein G00000176293          |
| 54838     | 0,001069177 | 0,00097638 | 0,107976627 | 0,8505278 | 8,811807819  | 7,961235015  | 9,99E-05 | 0,6198888    | 0,794067654 | 0,021201453  | WBP1L     | binding pr <sup>in</sup> -coding, th protein G00000166272          |
| 1396      | 0,000777753 | 0,00098845 | 0,107796037 | 0,5659253 | 6,095773716  | 5,529848378  | 0,06179  | 0,350091679  | 0,766583204 | -0,03705222  | CRIP1     | ne rich pr <sup>in</sup> -coding, th protein G00000213145          |
| 152816    | 0,001487556 | 0,0009963  | 0,108246797 | -1,919065 | 6,324771585  | 8,243836204  | 0,047723 | -0,947807971 | 0,279618755 | -0,188437388 | C4orf26   | 4 open rea <sup>in</sup> -coding, th protein G00000174792          |
| 5919      | 0,001223639 | 0,00103155 | 0,111101844 | -1,276343 | 11,25998198  | 12,53632535  | 0,122441 | -0,2736705   | 0,003936052 | -0,859122557 | RARRES2   | 3 receptor <sup>in</sup> -coding, th protein G00000106538          |
| 100130817 | 0,000985088 | 0,00103664 | 0,110687509 | 1,036147  | 5,678501629  | 4,642354624  | 0,425466 | 0,234155156  | 0,105944562 | 0,25101647   |           |                                                                    |
| 85365     | 0,001938989 | 0,00103902 | 0,10999355  | 0,684382  | 9,395714342  | 8,711332354  | 0,106008 | 0,288818701  | 0,085367899 | 0,297150703  | ALG2      | yl/1,6-mann <sup>in</sup> -coding, th protein G00000119523         |
| 8705      | 0,001770371 | 0,00104341 | 0,109521889 | -0,699938 | 9,173933273  | 9,873871232  | 0,089232 | 0,425295904  | 0,000331901 | -1,009059876 | B3GALT4   | alactosyltra <sup>in</sup> -coding, th protein G00000235863        |
| 5784      | 0,000816547 | 0,00105274 | 0,109572611 | 1,0076602 | 9,564816275  | 8,557156047  | 0,002322 | 0,574836904  | 0,065396509 | 0,241545426  | PTPN14    | sphatase, <sup>in</sup> -coding, th protein G00000152104           |
| 146754    | 0,001940946 | 0,00109111 | 0,112619563 | -0,611941 | 6,754702597  | 7,366643123  | 0,235594 | -0,190052596 | 0,016557722 | -0,258473617 | DNAH2     | enmal he <sup>in</sup> -coding, th protein G00000183914            |
| 150759    | 0,001631332 | 0,00110623 | 0,113237017 | 0,5559793 | 9,296218151  | 8,740238838  | 0,355595 | -0,484157295 | 0,252967335 | -0,072937152 | LINC00342 | on-protein <sup>in</sup> -coding, Rlong non-cG00000232931          |
| 79089     | 0,002032158 | 0,00111827 | 0,112608481 | 0,5334749 | 8,135235971  | 7,60176107   | 0,142418 | 0,300244948  | 0,306912648 | -0,063476028 | TMUB2     | biquitin lik <sup>in</sup> -coding, th protein G00000168591        |
| 972       | 0,00111594  | 0,00112105 | 0,111978065 | -0,98534  | 10,70799637  | 11,69333671  | 0,293869 | -0,251340976 | 0,004069527 | -0,591773296 | CD74      | 74 molecu <sup>in</sup> -coding, th protein G00000019582           |
| 837       | 0,001874309 | 0,00113631 | 0,112594114 | -0,778746 | 9,359169071  | 10,13791486  | 0,030986 | -0,635262867 | 0,040773274 | -0,271564305 | CASP4     | caspace 4 <sup>in</sup> -coding, th protein G00000196954           |
| 54470     | 0,001681628 | 0,00113686 | 0,111755121 | 0,5748975 | 8,960264051  | 8,385366517  | 0,163341 | 0,167288914  | 0,055253949 | -0,185470104 | ARMCX6    | at contain <sup>in</sup> -coding, th protein G00000198960          |
| 55847     | 0,001850474 | 0,00114096 | 0,111274906 | -0,685895 | 11,910490347 | 12,60079948  | 0,061241 | -0,179992495 | 0,040582337 | -0,233424829 | CISD1     | ron sulfur <sup>in</sup> -coding, th protein G00000122873          |
| 7045      | 0,001854402 | 0,00114796 | 0,111082306 | -1,561896 | 7,636590512  | 9,198486711  | 0,136087 | -0,536479526 | 0,045286604 | -0,511517479 | TGFBI     | rowth fact <sup>in</sup> -coding, th protein G00000120708          |
| 83440     | 0,002218064 | 0,00119616 | 0,114849108 | -0,972915 | 6,312540254  | 7,285455206  | 0,022614 | -0,496213395 | 0,887389344 | 0,014890384  | ADPGK     | endent gluz <sup>in</sup> -coding, th protein G00000159322         |
| 79627     | 0,00165358  | 0,00120202 | 0,113649818 | -1,224202 | 10,14410369  | 11,36830546  | 0,094407 | -0,412753659 | 0,004999685 | -0,69042678  | OGFRL1    | th factor re <sup>in</sup> -coding, th protein G00000119900        |
| 240       | 0,00020473  | 0,00120508 | 0,11307662  | -0,660698 | 6,376604796  | 7,037302445  | 0,233928 | -0,180804324 | 0,04921047  | -0,313857946 | ALOX5     | nate 5-lipo <sup>in</sup> -coding, th protein G00000012779         |
| 4828      | 0,000502471 | 0,00122197 | 0,112949334 | -0,759478 | 10,08709027  | 10,84656816  | 0,025526 | -0,616755176 | 0,005784183 | -0,527528421 | NMB       | euromedin <sup>in</sup> -coding, th protein G00000197696           |
| 79956     | 0,001104756 | 0,00122845 | 0,112707376 | -0,907352 | 5,391918064  | 6,299270512  | 0,275954 | -0,367320337 | 0,28844226  | -0,10589091  | ERMP1     | iculum me <sup>in</sup> -coding, th protein G00000099219           |
| 8678      | 0,001203651 | 0,00122898 | 0,111927388 | 0,5643791 | 8,999926277  | 8,435547183  | 0,00307  | 0,246520703  | 0,000350614 | 0,484242861  | BECN1     | beclin 1 <sup>in</sup> -coding, th protein G00000126581            |
| 7105      | 0,001833415 | 0,00124427 | 0,112492541 | -0,823571 | 8,974282055  | 9,79785313   | 0,007958 | -0,309247942 | 0,048090918 | -0,214401372 | TSPAN6    | traspanin <sup>in</sup> -coding, th protein G00000000003           |
| 56548     | 0,002276016 | 0,00124979 | 0,112173112 | 0,7899793 | 8,218444375  | 7,428465028  | 0,010473 | 0,431479656  | 0,142945588 | 0,176054484  | CHST7     | ate sulfotra <sup>in</sup> -coding, th protein G00000147119        |
| 10969     | 0,000523054 | 0,00126355 | 0,112591551 | 0,5167267 | 12,1622795   | 12,1622795   | 0,631209 | 0,058643704  | 0,017565055 | 0,414222431  | EBNA1BP2  | binding pr <sup>in</sup> -coding, th protein G00000117395          |
| 3431      | 0,001281189 | 0,0012893  | 0,114065859 | -0,644749 | 6,763918434  | 7,408667121  | 0,638282 | -0,050215511 | 0,084112617 | -0,154653125 | SP110     | uclear bod <sup>in</sup> -coding, th protein G00000135899          |
| 27102     | 0,001376522 | 0,00128935 | 0,113260959 | -1,693802 | 8,280743225  | 9,974545501  | 0,003029 | -1,386361419 | 0,664387371 | -0,095963703 | EIF2AK1   | initiation fa <sup>in</sup> -coding, th protein G00000086232       |

|           |             |            |             |           |              |             |          |              |             |              |           |                                                 |
|-----------|-------------|------------|-------------|-----------|--------------|-------------|----------|--------------|-------------|--------------|-----------|-------------------------------------------------|
| 4499      | 0,001528575 | 0,00129566 | 0,113014156 | -1,48416  | 11,66122347  | 13,14538866 | 0,093099 | -1,084039392 | 0,597526709 | -0,083757211 | MT1M      | allothionein-coding, th protein G00000205364    |
| 6208      | 0,001391563 | 0,00132443 | 0,113919096 | 0,6463373 | 12,12002134  | 11,47368406 | 0,159866 | 0,185736995  | 0,036022745 | 0,352853457  | RPS14     | mal protein-coding, th protein G00000164587     |
| 4711      | 0,000236108 | 0,00132736 | 0,113383902 | -1,019526 | 9,283464829  | 10,30299038 | 0,001056 | -0,321269363 | 0,022969295 | -0,128954097 | NDUFB5    | e oxidoreductin-coding, th protein G00000136521 |
| 29914     | 0,002338405 | 0,00134431 | 0,113268905 | 0,8214731 | 10,50930794  | 9,687834878 | 0,030135 | 0,322032625  | 0,025495508 | 0,313927432  | UBIAD1    | ferase domain-coding, th protein G00000120942   |
| 57089     | 0,001457079 | 0,0013732  | 0,11415012  | 0,62393   | 7,672256754  | 7,048326716 | 0,117845 | 0,278462874  | 0,007335837 | 0,484264237  | ENTPD7    | osphate diisn-coding, th protein G00000198018   |
| 3241      | 0,002552746 | 0,00139161 | 0,114909122 | 1,0513557 | 11,65897356  | 10,60761786 | 0,018923 | 0,369885258  | 0,129293695 | 0,228645513  | HPCAL1    | pocalcin likein-coding, th protein G00000115756 |
| 51506     | 0,000924327 | 0,0014013  | 0,114943275 | 0,7127438 | 11,28073851  | 10,56799475 | 0,088092 | 0,592113713  | 0,01262078  | -1,319957673 | UFC1      | idifier conjein-coding, th protein G00000143222 |
| 100130502 | 0,001767223 | 0,0014054  | 0,114521404 | -0,597089 | 7,277177015  | 7,874266293 | 0,094615 | -0,306823716 | 0,007920742 | -0,258193653 |           |                                                 |
| 135114    | 0,002107626 | 0,00141918 | 0,113406107 | 0,9690546 | 7,685201971  | 6,716147333 | 0,028207 | 0,485418358  | 0,072530933 | 0,271310631  | HINT3     | ucleotide bsin-coding, th protein G00000111911  |
| 124808    | 0,001721689 | 0,00143052 | 0,112856079 | -1,053314 | 8,201356479  | 9,254670955 | 0,067736 | -0,916581544 | 0,125963361 | 0,2438426    | CCDC43    | domain coain-coding, th protein G00000180329    |
| 1326      | 0,002253    | 0,00147101 | 0,113874286 | -1,486101 | 5,380099134  | 6,866199917 | 0,087389 | -0,675608143 | 0,069749484 | -0,571785937 | MAP3K8    | protein kinain-coding, th protein G00000107968  |
| 317       | 0,002106377 | 0,00153755 | 0,11755542  | -1,204272 | 7,059290395  | 8,263562543 | 0,038494 | -0,738728858 | 0,007042909 | -0,790312279 | APAF1     | tidase actiein-coding, th protein G00000120868  |
| 4580      | 0,002018245 | 0,00153816 | 0,116880935 | 0,5144416 | 10,49119601  | 9,976754377 | 0,012313 | 0,305355186  | 0,179839197 | -0,10620811  | MTX1      | metaxin 1 sin-coding, th protein G00000173171   |
| 11262     | 0,002806309 | 0,00154979 | 0,11633696  | -0,899519 | 5,9600483384 | 6,860002623 | 0,185581 | -0,345478866 | 0,25350889  | -0,133717412 | SP140     | uclear bodyin-coding, th protein G00000079263   |
| 23229     | 0,002832174 | 0,00156609 | 0,116152949 | 0,5497177 | 7,370851823  | 6,821134102 | 0,04961  | 0,381150652  | 0,540519266 | 0,036758762  | ARHGGEF9  | ucleotide ein-coding, th protein G00000131089   |
| 2498      | 0,002734077 | 0,00159122 | 0,115934021 | -1,152387 | 13,800497299 | 14,9604597  | 0,021858 | -0,325431588 | 0,124067406 | -0,235147191 | FTH1P3    | y chain 1 pseedogenosseudogenG00000213453       |
| 2820      | 0,001541546 | 0,00159419 | 0,115470844 | -1,132135 | 6,701840076  | 7,833975543 | 0,032572 | -0,959883128 | 0,417484709 | 0,105051943  | GPD2      | sphate delain-coding, th protein G00000115159   |
| 5281      | 0,000452661 | 0,00160301 | 0,115435352 | -1,290056 | 6,897523924  | 8,187579806 | 0,004792 | -1,071832403 | 0,045995244 | -0,418381435 | PIGF      | lycan anchain-coding, th protein G00000151665   |
| 51201     | 0,0021224   | 0,00161291 | 0,114812574 | -0,971447 | 8,966512805  | 9,937959691 | 0,068856 | -0,28586139  | 0,993930298 | 0,000599778  | ZDHHC2    | IHC-type ain-coding, th protein G00000104219    |
| 55344     | 0,002973515 | 0,00163856 | 0,115313613 | 0,7787732 | 7,26637833   | 6,487605093 | 0,004557 | 0,598170426  | 0,047477661 | 0,267423355  | PLCXD1    | phospholiain-coding, th protein G00000182378    |
| 83931     | 0,001440354 | 0,00164421 | 0,115056926 | 0,9301423 | 8,575875505  | 7,645733237 | 0,450363 | 0,040578141  | 0,007139015 | 0,659365415  | STK40     | hreonine ksin-coding, th protein G00000196182   |
| 6612      | 0,003020577 | 0,00166335 | 0,115742973 | -0,737523 | 12,60478581  | 12,60478581 | 0,018597 | -0,436870498 | 0,710115901 | -0,042907106 | SUMO3     | uitin-like rain-coding, th protein G00000184900 |
| 645843    | 0,002100286 | 0,00167264 | 0,115738996 | -0,679531 | 5,87895985   | 6,558490875 | 0,056503 | -0,630123295 | 0,783453547 | -0,060040369 | TMEM14E   | protein 1sseudogenosseudogenG00000221962        |
| 284099    | 0,002595735 | 0,00168654 | 0,116052606 | -1,531482 | 3,07186411   | 4,603346451 | 0,340016 | -0,323543336 | 0,73063779  | 0,096829341  | C17orf78  | l7 open reain-coding, th protein G000002278505  |
| 6584      | 0,000652482 | 0,00168982 | 0,115000303 | -0,77968  | 6,772168351  | 7,551848324 | 0,027186 | -0,412464177 | 0,205818188 | -0,15165597  | SLC22A5   | er family 2ain-coding, th protein G00000197375  |
| 2019      | 0,002682502 | 0,00177475 | 0,120120398 | 1,188276  | 3,63800533   | 2,449729292 | 0,212192 | 1,281303995  | 0,428245799 | 0,29061142   | EN1       | iled homecain-coding, th protein G00000163064   |
| 10398     | 0,003187062 | 0,00178116 | 0,119928395 | 1,5587383 | 12,05335517  | 10,49461683 | 0,030679 | 0,68503475   | 0,602736547 | 0,103768887  | MYL9      | sin light chain-coding, th protein G00000101335 |
| 4501      | 0,00312554  | 0,00179983 | 0,11985312  | -0,946501 | 9,84674773   | 10,7932484  | 0,029827 | -0,606992881 | 0,490519145 | -0,125841245 | MT1X      | allothionein-coding, th protein G00000187193    |
| 9693      | 0,003061605 | 0,00180609 | 0,119626671 | -0,801599 | 7,106401578  | 7,908000725 | 0,111801 | -0,55881361  | 0,285175775 | -0,118847221 | RAPGEF2   | leotide exain-coding, th protein G00000109756   |
| 2107      | 0,002839142 | 0,00181958 | 0,119878856 | 0,8290236 | 10,38010511  | 9,551081511 | 0,077777 | 0,448004503  | 0,062795106 | 0,275833792  | ETF1      | ilation termain-coding, th protein G00000120705 |
| 5087      | 0,000630491 | 0,00182774 | 0,119779258 | 1,6209099 | 8,815890713  | 7,194980845 | 0,178913 | 0,536748883  | 0,748287087 | 0,071931942  | PBX1      | K homeobcain-coding, th protein G00000185630    |
| 170371    | 0,002833709 | 0,00184058 | 0,119986215 | 0,9966742 | 5,037382697  | 4,040708465 | 0,097017 | 1,179461217  | 0,580606833 | -0,282961285 | C10orf128 | o open reain-coding, th protein G00000204161    |
| 8882      | 0,001261982 | 0,0018976  | 0,122414405 | 0,7163108 | 10,05955531  | 10,05955531 | 0,056004 | 0,216077831  | 0,048308357 | 0,254831038  | ZPR1      | R1 zinc fingein-coding, th protein G00000109917 |
| 64061     | 0,002653135 | 0,00190284 | 0,122116692 | 1,5826954 | 8,036651499  | 6,453956093 | 0,013475 | 0,852449883  | 0,02063184  | 0,741505622  | TSPYL2    | TSPY like 2sin-coding, th protein G00000184205  |
| 8880      | 0,001806094 | 0,00192966 | 0,122567585 | -0,537015 | 9,458976357  | 9,995991587 | 0,066311 | -0,189160048 | 0,059624003 | -0,108083539 | FUBP1     | lement birain-coding, th protein G00000162613   |
| 64145     | 0,000531072 | 0,00193165 | 0,122068114 | 1,2269446 | 8,040882812  | 6,813938204 | 0,274347 | 0,374730065  | 0,100370079 | 0,346260511  | RBSN      | syn, RAB ein-coding, th protein G00000131381    |
| 84981     | 0,002838761 | 0,00194495 | 0,122284549 | 0,7178943 | 9,332511929  | 8,614617637 | 0,042478 | 0,437764016  | 0,09396865  | -0,170373794 | MIR22HG   | R22 host gen-coding Rlong non-cG00000186594     |
| 10522     | 0,002894193 | 0,0019664  | 0,121778866 | -0,512544 | 9,01848812   | 9,531031796 | 0,249227 | -0,258529331 | 0,791374225 | -0,030043484 | DEAF1     | transcripticain-coding, th protein G00000177030 |
| 51071     | 0,00316251  | 0,00197586 | 0,121756016 | -1,356614 | 7,056690351  | 8,413304053 | 0,008084 | -0,650649251 | 0,802067088 | -0,040989204 | DERA      | e-phosphazin-coding, th protein G00000023697    |
| 145482    | 0,003534647 | 0,0019781  | 0,12129053  | -0,948353 | 6,197850479  | 7,146203719 | 0,127895 | -0,550856888 | 0,150635677 | 0,224640001  | PTGR2     | landin redain-coding, th protein G00000140043   |
| 5791      | 0,003575993 | 0,00200529 | 0,122351845 | 0,5898998 | 8,419779009  | 7,829879239 | 0,023464 | 0,554342901  | 0,453562194 | 0,058727472  | PTPRE     | hosphatasain-coding, th protein G00000132334    |
| 6722      | 0,001217726 | 0,00202629 | 0,122427044 | 0,9720677 | 9,062762397  | 8,090694648 | 0,017121 | 0,314450256  | 0,046913185 | 0,310522264  | SRF       | response ain-coding, th protein G00000112658    |
| 55114     | 0,002762991 | 0,00204088 | 0,122709725 | -0,539259 | 7,278416741  | 7,817675288 | 0,068243 | -0,324089491 | 0,355857999 | -0,072286714 | ARHGAP17  | activatingain-coding, th protein G00000140750   |
| 81848     | 0,003598074 | 0,0020525  | 0,122222087 | 0,7206384 | 9,106009705  | 8,385371288 | 0,012074 | 0,47351574   | 0,375910063 | 0,107053376  | SPRY4     | : signaling ain-coding, th protein G00000187678 |
| 221718    | 8,61102E-05 | 0,0020636  | 0,121712939 | -4,500612 | 0            | 4,500611964 | 0,309648 | -0,889503063 | 0,023579808 | -3,611108902 | LINC00518 | on-protein-coding Rlong non-cG00000183674       |
| 131873    | 0,003446101 | 0,00206451 | 0,121188999 | 2,3590928 | 2,78163879   | 0,422546009 | 0,897997 | 0,103569114  | 0,093963996 | 1,335835898  | COL6A6    | ype VI alplain-coding, th protein G00000206384  |
| 2693      | 0,001786817 | 0,00208793 | 0,121413198 | -0,898753 | 5,402755112  | 6,301507661 | 0,223577 | -0,234410018 | 0,012019397 | -0,500752346 | GHSR      | ne secretatain-coding, th protein G00000121853  |
| 51397     | 0,000773125 | 0,00210982 | 0,1221126   | 1,3698672 | 9,492900853  | 8,123033613 | 0,016747 | 0,652164888  | 0,090216995 | 0,369551592  | COMMD10   | domain contain-coding, th protein G00000145781  |
| 57406     | 0,000916354 | 0,00212186 | 0,122238467 | 0,6013951 | 7,556572306  | 6,955173207 | 0,015516 | 0,341825482  | 0,033551858 | 0,291819461  | ABHD6     | e domain csin-coding, th protein G00000163686   |
| 7113      | 0,003711359 | 0,00214682 | 0,12310382  | -0,82191  | 6,358985231  | 7,180895578 | 0,267756 | -0,340572406 | 0,139768735 | -0,182150907 | TMPRSS2   | rane proteain-coding, th protein G00000184012   |
| 51726     | 0,003590417 | 0,00215006 | 0,122713444 | 0,7910891 | 11,0796609   | 10,28857184 | 0,153994 | 0,360307751  | 0,035446693 | 0,419408599  | DNAJB11   | ein family ain-coding, th protein G00000090520  |
| 4615      | 0,003246583 | 0,00215218 | 0,122279146 | -0,572657 | 8,036122459  | 8,60877961  | 0,13043  | -0,118642056 | 0,078088494 | -0,181881774 | MYD88     | tiation primain-coding, th protein G00000172936 |
| 79940     | 0,001196739 | 0,0021694  | 0,12213699  | -0,694606 | 9,258418761  | 9,953024494 | 0,142014 | -0,288417017 | 0,063864306 | -0,404982703 | LINC00472 | on-protein-coding Rlong non-cG00000233237       |
| 2760      | 0,00025661  | 0,00217238 | 0,121751176 | -0,757642 | 8,501610435  | 9,259252353 | 0,072764 | -0,253495131 | 0,016111011 | -0,5598037   | GM2A      | nglioside ain-coding, th protein G00000196743   |
| 285381    | 0,001192245 | 0,00220207 | 0,122859    | 0,6681324 | 11,51168955  | 10,84355712 | 0,007682 | 0,393794518  | 0,421838391 | -0,062688696 | DPH3      | nide biosyain-coding, th protein G00000154813   |
| 3162      | 0,00298897  | 0,00222564 | 0,123617406 | -1,345728 | 8,534729913  | 9,880458109 | 0,016388 | -1,211443861 | 0,423732432 | 0,225650835  | HMOX1     | ie oxygenain-coding, th protein G00000100292    |
| 6672      | 0,00268524  | 0,0022429  | 0,123468772 | -0,870111 | 8,023395944  | 8,893506738 | 0,060629 | -0,287718558 | 0,958351571 | 0,006519308  | SP100     | ) nuclear arain-coding, th protein G00000067066 |
| 80114     | 0,003895976 | 0,00224569 | 0,123075471 | -1,197079 | 6,575983121  | 7,773062121 | 0,102546 | -0,295273652 | 0,071327151 | -0,399510069 | BICC1     | RNA bindirain-coding, th protein G00000122870   |
| 2702      | 0,001976562 | 0,00226674 | 0,1226018   | 1,1460161 | 3,973434401  | 2,827418273 | 0,682117 | 0,135180556  | 0,111132982 | 0,643438402  | GJA5      | tion proteain-coding, th protein G00000265107   |

|        |             |            |             |                  |             |             |          |              |             |              |          |                                                  |
|--------|-------------|------------|-------------|------------------|-------------|-------------|----------|--------------|-------------|--------------|----------|--------------------------------------------------|
| 26689  | 0,000129655 | 0,00227171 | 0,122336338 | <b>3,1278133</b> | 3,127813318 | 0           | 0,878669 | -0,238831298 | 0,197323691 | 2,129181963  | OR4D1    | amily 4 sutzin-coding, th protein G00000141194   |
| 51241  | 0,00179682  | 0,00227652 | 0,122064493 | <b>-0,760433</b> | 10,98154377 | 11,74197719 | 0,166954 | -0,446597855 | 0,64020992  | -0,051312246 | COX16    | z c oxidasezin-coding, th protein G00000133983   |
| 10802  | 0,003121377 | 0,00227883 | 0,121661507 | <b>0,5156275</b> | 8,722275953 | 8,207098467 | 0,155603 | 0,179078005  | 0,901980666 | -0,010352033 | SEC24A   | OPIL coat ein-coding, th protein G00000113615    |
| 253430 | 0,000538854 | 0,00228915 | 0,12168783  | <b>-1,331443</b> | 6,169800316 | 7,501243047 | 0,054341 | -0,717637555 | 0,111717695 | -0,16735948  | IPMK     | phosphatezin-coding, th protein G00000111511     |
| 56986  | 0,003348317 | 0,00229212 | 0,121276413 | <b>-0,591323</b> | 7,025244466 | 7,616567444 | 0,029802 | -0,671538782 | 0,849101754 | 0,016161333  | DTWD1    | main contain-coding, th protein G00000104047     |
| 10437  | 0,002147516 | 0,0023073  | 0,121609267 | <b>-0,860055</b> | 10,08418195 | 10,94423723 | 0,194388 | -0,208851738 | 0,072823437 | -0,333637323 | IFI30    | somal thiolzin-coding, th protein G00000216490   |
| 9855   | 0,000725647 | 0,00231312 | 0,121399029 | <b>0,6001976</b> | 6,74934008  | 6,149142467 | 0,147295 | 0,245176737  | 0,039474956 | 0,325038087  | FARP2    | and pleckstein-coding, th protein G00000006607   |
| 64419  | 0,003470219 | 0,00232997 | 0,121255836 | <b>-0,545167</b> | 7,503141929 | 8,048308934 | 0,036878 | -0,195681595 | 0,858169731 | -0,012876173 | MTMR14   | rin relatedzin-coding, th protein G00000163719   |
| 51552  | 0,004001619 | 0,0023319  | 0,120848641 | <b>-0,90669</b>  | 9,714026388 | 10,62071641 | 0,023031 | -0,545084959 | 0,964871665 | 0,005695793  | RAB14    | er RAS onein-coding, th protein G00000119396     |
| 10055  | 0,003960288 | 0,00239047 | 0,122348306 | <b>0,5387486</b> | 9,92036946  | 9,381620843 | 0,487604 | 0,071462755  | 0,02848769  | 0,323785829  | SAE1     | ating enzymein-coding, th protein G00000142230   |
| 7923   | 0,002789005 | 0,00239298 | 0,121972541 | <b>-0,626615</b> | 7,157994042 | 7,78460856  | 0,179059 | -0,107087202 | 0,091040627 | -0,185138023 | HSD17B8  | 17-beta dezin-coding, th protein G00000204228    |
| 64398  | 0,001742161 | 0,00239675 | 0,121664208 | <b>-0,810776</b> | 7,797100722 | 8,607876869 | 0,001988 | -0,602240311 | 0,613959183 | -0,050711694 | MPP5     | almitoylatzin-coding, th protein G00000072415    |
| 253827 | 0,003501692 | 0,00241546 | 0,122113473 | <b>1,0634802</b> | 8,766087364 | 7,702607165 | 0,118565 | 0,41097913   | 0,036117889 | 0,479975731  | MSRB3    | sulfoxide rein-coding, th protein G00000174099   |
| 442240 | 0,003513842 | 0,00242791 | 0,121749165 | <b>0,5118509</b> | 10,08078092 | 9,568930036 | 0,226718 | 0,122977355  | 0,155335751 | 0,146347772  | ZNF259P1 | otein 259 pseudogenouseudogenG00000219565        |
| 83734  | 0,002323018 | 0,00243436 | 0,12060757  | <b>-0,975035</b> | 5,533603723 | 6,508638425 | 0,018924 | -1,040099685 | 0,699429323 | 0,075200561  | ATG10    | shagy relatazin-coding, th protein G00000152348  |
| 55283  | 0,004176305 | 0,00243843 | 0,120328022 | <b>-1,104187</b> | 5,482641467 | 6,586828859 | 0,060706 | -0,481909321 | 0,101963912 | -0,326826797 | MCOLN3   | mucopolin zin-coding, th protein G00000055732    |
| 4521   | 0,004236079 | 0,00249    | 0,121901324 | <b>-0,908344</b> | 9,502556606 | 10,41090079 | 0,02123  | -0,557176992 | 0,471323923 | 0,089423014  | NUDT1    | fix hydrolazin-coding, th protein G00000106268   |
| 8853   | 0,003033275 | 0,00253253 | 0,123495556 | <b>-0,694683</b> | 8,295045955 | 8,98972894  | 0,028076 | -0,465031748 | 0,534332975 | 0,065351488  | ASAP2    | n, ankyrin ein-coding, th protein G00000151693   |
| 51199  | 0,001934766 | 0,00262936 | 0,127215584 | <b>-0,705769</b> | 7,777308037 | 8,483077206 | 0,074218 | -0,539824509 | 0,21249756  | 0,168446451  | NIN      | ninein zin-coding, th protein G00000105003       |
| 9189   | 0,00438263  | 0,00263312 | 0,126409644 | <b>-0,707585</b> | 6,939991826 | 7,64757648  | 0,048632 | -0,672577124 | 0,271392177 | -0,13308918  | ZBED1    | BED-type ein-coding, th protein G00000214717     |
| 10237  | 0,001337464 | 0,0026372  | 0,126116879 | <b>0,7991456</b> | 11,72268999 | 10,92354443 | 0,025104 | 0,370361128  | 0,021975369 | 0,350309387  | SLC35B1  | r family 35ein-coding, th protein G00000121073   |
| 6945   | 0,004508568 | 0,00265825 | 0,126634684 | <b>0,5360118</b> | 10,13520296 | 9,5991912   | 0,00325  | 0,439831265  | 0,197789969 | 0,1095137    | MLX      | imerizatzin-coding, th protein G00000108788      |
| 221687 | 0,004443159 | 0,002687   | 0,126064902 | <b>0,7879366</b> | 8,403402237 | 7,615465655 | 0,047584 | 0,669055841  | 0,060953212 | 0,618409729  | RNF182   | nger protezin-coding, th protein G00000180537    |
| 28973  | 0,004533619 | 0,00271265 | 0,126311074 | <b>-0,580133</b> | 9,400245751 | 9,980378579 | 0,048215 | -0,511084782 | 0,003706807 | -0,485447619 | MRPS18B  | ribosomalin-coding, th protein G00000204568      |
| 5694   | 0,001582212 | 0,00273092 | 0,125743756 | <b>0,5478205</b> | 12,42115942 | 12,42115942 | 0,189617 | -0,16367938  | 0,177594777 | 0,144870427  | PSMB6    | me subunzin-coding, th protein G00000142507      |
| 7039   | 0,002088801 | 0,00273608 | 0,125514649 | <b>0,5848125</b> | 8,423295278 | 7,838482732 | 0,33699  | 0,141090543  | 0,395465469 | 0,062479777  | TGFA     | g growth feinz-coding, th protein G00000163235   |
| 307    | 0,003857453 | 0,00274116 | 0,125283624 | <b>-0,558201</b> | 9,794414803 | 10,3523433  | 0,045031 | -0,101258762 | 0,007890388 | -0,472401366 | ANXA4    | annexin A4ein-coding, th protein G00000196975    |
| 5530   | 0,000543706 | 0,00277519 | 0,125450201 | <b>-1,355349</b> | 8,657236134 | 10,01258484 | 0,000917 | -0,807168895 | 0,011086096 | -0,383839445 | PPP3CA   | ase 3 catalzin-coding, th protein G00000138814   |
| 3708   | 0,004640216 | 0,00278306 | 0,124443748 | <b>0,5116208</b> | 5,333074717 | 4,821453892 | 0,617082 | -0,062911401 | 0,009396292 | 0,34979885   | ITPR1    | hosphatezin-coding, th protein G00000150995      |
| 727936 | 0,000953287 | 0,00278453 | 0,124061469 | <b>-1,382547</b> | 7,399967828 | 8,782514716 | 0,01048  | -0,758868187 | 0,004469419 | -0,482703941 | GXYLT2   | xylosyltranzin-coding, th protein G00000172986   |
| 80335  | 0,003892168 | 0,00278691 | 0,123722578 | <b>0,7541048</b> | 9,535320551 | 8,781215753 | 0,040804 | 0,277863488  | 0,010312838 | 0,429186661  | WDR82    | peat domazin-coding, th protein G00000164091     |
| 64116  | 0,002935437 | 0,00279253 | 0,123089595 | <b>-1,27896</b>  | 7,199100983 | 8,478061349 | 0,047325 | -0,749149137 | 0,385426781 | 0,1025179    | SLC39A8  | er family 39ein-coding, th protein G00000138821  |
| 2764   | 0,001644693 | 0,00279321 | 0,122682995 | <b>-1,838164</b> | 7,971589552 | 9,807573887 | 0,009028 | -1,14719691  | 0,605724921 | -0,116629888 | GMFB     | uration faczin-coding, th protein G00000197045   |
| 91947  | 0,003788933 | 0,00282889 | 0,123374926 | <b>0,586807</b>  | 6,621414523 | 6,034607542 | 0,132869 | 0,403229863  | 0,676990539 | -0,065892116 | ARRDC4   | omain corzin-coding, th protein G00000140450     |
| 1975   | 0,00176516  | 0,00286959 | 0,124711108 | <b>-0,543604</b> | 10,30739054 | 10,85099453 | 0,118039 | -0,392107363 | 0,058638865 | -0,180660086 | EIF4B    | lation initzin-coding, th protein G00000063046   |
| 55622  | 0,004507911 | 0,00289461 | 0,124921798 | <b>0,5646484</b> | 8,328616877 | 7,76396847  | 0,003973 | 0,332400084  | 0,068717661 | 0,172480738  | TTC27    | ptide repezin-coding, th protein G00000018699    |
| 4502   | 0,002226943 | 0,00291648 | 0,125428413 | <b>-0,50019</b>  | 16,22382433 | 16,72401386 | 0,2989   | -0,317082379 | 0,325400891 | -0,168099271 | MT2A     | allothionein-coding, th protein G00000125148     |
| 50486  | 0,004419572 | 0,00291901 | 0,125102998 | <b>1,2181301</b> | 11,33718509 | 11,33718509 | 0,013182 | 0,807515453  | 0,054945127 | 0,419985703  | GO52     | /Y/G1 switchzin-coding, th protein G00000123689  |
| 19     | 0,003308048 | 0,00292084 | 0,124749655 | <b>-1,00204</b>  | 7,407340726 | 8,409380441 | 0,254977 | -0,486400637 | 0,517060029 | 0,142782483  | ABCA1    | ette subfaein-coding, th protein G00000165029    |
| 29969  | 0,00368009  | 0,00296065 | 0,125584076 | <b>-1,878326</b> | 6,594182244 | 8,472508691 | 0,112269 | -1,169477303 | 0,59352853  | -0,097125317 | MPD1C    | hibitor dorzin-coding, th protein G00000135272   |
| 7262   | 0,004906655 | 0,00296923 | 0,125518151 | <b>0,5884342</b> | 13,7238963  | 13,13546207 | 0,106173 | 0,207832844  | 0,107419534 | 0,216027172  | PHLDA2   | like domazin-coding, th protein G00000181649     |
| 23456  | 0,000247399 | 0,00302113 | 0,126845916 | <b>-0,928796</b> | 7,249470509 | 8,178266349 | 0,064257 | -0,456517809 | 0,336843913 | -0,067490623 | ABC810   | ette subfaein-coding, th protein G00000135776    |
| 2589   | 0,001247775 | 0,00307562 | 0,128697645 | <b>-0,905142</b> | 9,059630146 | 9,964772094 | 0,005794 | -0,313341498 | 0,012394085 | -0,211000917 | GALNT1   | ylgalactoszin-coding, th protein G00000141429    |
| 54509  | 0,004553072 | 0,00309351 | 0,129010393 | <b>0,9082271</b> | 9,09809516  | 8,189868068 | 0,105702 | 0,28598318   | 0,268223535 | 0,128976019  | RHOF     | member F, zin-coding, th protein G00000139725    |
| 4498   | 0,003696032 | 0,00310004 | 0,128848784 | <b>-1,260971</b> | 9,5243421   | 10,78531318 | 0,1462   | -0,484498457 | 0,313974261 | -0,205987685 | MT1JP    | onein 1j, pseudogenouseudogenG00000255986        |
| 933    | 0,00467805  | 0,003101   | 0,128457879 | <b>-0,727361</b> | 5,807411807 | 6,534772668 | 0,126745 | -0,390886799 | 0,445519781 | 0,102551371  | CD22     | 222 moleczin-coding, th protein G00000012124     |
| 670    | 0,002703566 | 0,00312305 | 0,128511398 | <b>-0,981566</b> | 7,91871376  | 8,893437213 | 0,107082 | -0,237686847 | 0,023675533 | -0,577622184 | BPHL     | nyl hydrolazin-coding, th protein G00000137274   |
| 65992  | 0,005180962 | 0,00316435 | 0,129779645 | <b>0,7300831</b> | 10,37282212 | 9,64273899  | 0,30959  | 0,188251616  | 0,283458036 | 0,127434748  | DDR6K1   | omain conzin-coding, th protein G00000198171     |
| 92659  | 0,005039784 | 0,00316598 | 0,129418117 | <b>0,6173227</b> | 7,203809981 | 7,821132641 | 0,006959 | 0,424792001  | 0,165013313 | 0,152187232  | MAFG-AS1 | se RNA 1 (n-coding Rlong non-cG00000265688       |
| 51626  | 0,005155066 | 0,00316975 | 0,129146125 | <b>-0,780661</b> | 6,530676332 | 7,311336884 | 0,23418  | -0,327135734 | 0,019286914 | -0,409461463 | DYNC2L1  | c 2 light intzin-coding, th protein G00000138036 |
| 23479  | 0,003425977 | 0,00317213 | 0,128819253 | <b>0,8683897</b> | 10,76599046 | 9,897600776 | 0,017009 | 0,459009375  | 0,008205636 | 0,513009994  | ISCU     | uster assezin-coding, th protein G00000136003    |
| 347    | 0,003130095 | 0,00318062 | 0,128322502 | <b>-1,014403</b> | 3,972128309 | 4,986531263 | 0,329649 | -0,625214144 | 0,582741265 | -0,144686276 | APOD     | lipoproteizin-coding, th protein G00000189058    |
| 164    | 0,005255757 | 0,00318379 | 0,128033488 | <b>-0,629914</b> | 7,514048435 | 8,143962036 | 0,071682 | -0,394766214 | 0,204257812 | 0,130650048  | AP1G1    | ein complezin-coding, th protein G00000166747    |
| 401264 | 0,00049408  | 0,00320351 | 0,128409728 | <b>-0,906744</b> | 6,542401766 | 7,449146116 | 0,04778  | -1,018062938 | 0,033300592 | 0,077379267  | TRAM2-AS | hse RNA 1 in-coding Rlong non-cG00000225791      |
| 4052   | 0,005320051 | 0,00322597 | 0,128892565 | <b>0,6445763</b> | 7,409513807 | 6,764937467 | 0,025412 | 0,380221055  | 0,236284835 | 0,144009924  | LTPB1    | wth factorzin-coding, th protein G00000049323    |
| 10207  | 0,003697917 | 0,00322676 | 0,12850986  | <b>-0,767645</b> | 6,781428627 | 7,549073734 | 0,064325 | -0,601636489 | 0,103643152 | -0,318832058 | PATJ     | polarity cozin-coding, th protein G00000132849   |
| 3127   | 0,004081683 | 0,0032727  | 0,129506421 | <b>-1,248762</b> | 9,235278035 | 10,48403958 | 0,0065   | -0,426170593 | 0,006806709 | -0,774934036 | HLA-DRB5 | ility complzin-coding, th protein G00000198502   |
| 286827 | 0,004964618 | 0,00328025 | 0,129391762 | <b>0,6222111</b> | 8,427983164 | 7,805772042 | 0,110734 | 0,311554385  | 0,196459931 | 0,145460765  | TRIM59   | motif contain-coding, th protein G00000213186    |
| 133    | 0,005393412 | 0,00328823 | 0,129294768 | <b>-0,960906</b> | 7,844022281 | 8,804928138 | 0,048374 | -0,519708062 | 0,013816521 | -0,700799768 | ADM      | renomedulin-coding, th protein G00000148926      |

|           |              |            |             |           |              |             |          |              |              |              |          |                                                  |
|-----------|--------------|------------|-------------|-----------|--------------|-------------|----------|--------------|--------------|--------------|----------|--------------------------------------------------|
| 160518    | 0,004818863  | 0,00328983 | 0,128948484 | -0,588805 | 6,311662759  | 6,900468208 | 0,049072 | -0,468859595 | 0,043501413  | 0,210583405  | DENND5B  | main containin-coding, th protein G00000170456   |
| 339487    | 0,001752602  | 0,00329188 | 0,128621584 | 0,661685  | 10,71021714  | 10,04853209 | 0,324834 | 0,297728371  | 0,414348982  | 0,090622136  | ZBTB80S  | nain containin-coding, th protein G00000176261   |
| 55152     | 0,004490756  | 0,00330279 | 0,128642373 | -0,725441 | 8,365088375  | 9,090529264 | 0,027305 | -0,575172146 | 0,718349192  | -0,031347245 | DALRD3   | inding dorain-coding, th protein G00000178149    |
| 23385     | 0,003408785  | 0,00332546 | 0,128715523 | -0,610695 | 8,469256702  | 9,07995206  | 0,970755 | -0,003904381 | 0,344518725  | -0,104163568 | NCSTN    | nicastriin-coding, th protein G00000162736       |
| 55304     | 0,0011757607 | 0,00332735 | 0,128387805 | -1,46094  | 6,422504788  | 7,883445051 | 0,083231 | -0,412829065 | 0,289363653  | -0,152480931 | SPTLC3   | ferase longin-coding, th protein G00000172296    |
| 125962    | 0,003820337  | 0,00333509 | 0,12828669  | -1,094788 | 4,550468506  | 5,645256761 | 0,136786 | -0,530732381 | 0,189761207  | 0,130076738  | ORTG1    | amily 7 sutain-coding, th protein G00000161807   |
| 3295      | 0,00110326   | 0,00337185 | 0,128503564 | -0,858939 | 8,266527749  | 9,125467003 | 0,057083 | -0,202712865 | 0,091924825  | -0,218691344 | HSD17B4  | 17-beta deain-coding, th protein G00000133835    |
| 358       | 0,001269929  | 0,00338114 | 0,128462319 | 0,9199979 | 8,047274628  | 7,127276724 | 0,096368 | 0,568619542  | 0,203765749  | -0,17346836  | AQP1     | 1 (Colton b)ain-coding, th protein G00000240583  |
| 10672     | 0,001597009  | 0,00339556 | 0,128615448 | 0,8866075 | 9,482581313  | 8,59597378  | 0,003633 | 0,525130413  | 0,900356728  | 0,007176976  | GNA13    | in subunit ain-coding, th protein G00000120063   |
| 79711     | 0,005525091  | 0,00339791 | 0,128312096 | 0,5119428 | 8,091466104  | 7,579523351 | 0,274116 | 0,087111941  | 0,024270605  | 0,267572423  | IPO4     | importin 4ain-coding, th protein G00000196497    |
| 10668     | 0,005625787  | 0,00347104 | 0,130279336 | 0,5267345 | 8,961056263  | 8,434321793 | 0,012896 | 0,433220183  | 0,385400572  | 0,075903998  | CGRRF1   | tor with rirain-coding, th protein G00000100532  |
| 729085    | 0,000620463  | 0,00348648 | 0,13046327  | 0,7130866 | 5,497359456  | 4,784272823 | 0,283272 | 0,280856484  | 0,617564125  | -0,101077519 | FAM198A  | nce similarain-coding, th protein G00000144649   |
| 10449     | 0,001795756  | 0,00351175 | 0,131013412 | -0,563191 | 8,817392082  | 9,380583551 | 0,119233 | -0,194674804 | 0,258854725  | -0,1072921   | ACAA2    | αA acyltranain-coding, th protein G00000167315   |
| 84869     | 0,005076234  | 0,00353315 | 0,131022401 | 0,7394639 | 8,893377554  | 8,153913622 | 0,209672 | 0,302495678  | 0,275080514  | 0,167347184  | CBR4     | nyl reductain-coding, th protein G00000145439    |
| 58489     | 0,002048556  | 0,00353719 | 0,130780492 | -1,915202 | 7,492661812  | 9,407864223 | 0,017826 | -1,521501978 | 0,857264173  | -0,067923173 | ABHD17C  | domain coain-coding, th protein G00000136379     |
| 54602     | 0,003829099  | 0,00353847 | 0,13005137  | -1,020701 | 8,393559783  | 9,41426123  | 0,0225   | -0,665829663 | 0,130206375  | -0,188234444 | NDFIP2   | ly interactain-coding, th protein G00000102471   |
| 55589     | 0,005698361  | 0,00358246 | 0,130506533 | 0,7661485 | 9,436096114  | 8,669947637 | 0,106135 | 0,233176894  | 0,011147583  | 0,612978433  | BMP2K    | inducible lein-coding, th protein G00000138756   |
| 128061    | 0,004944847  | 0,00358585 | 0,13024709  | -0,555229 | 7,289107973  | 7,84433699  | 0,64756  | -0,097224173 | 0,423280764  | 0,129125747  | C1orf131 | l open reacein-coding, th protein G00000143633   |
| 3122      | 0,003546631  | 0,00359172 | 0,130078578 | -1,894849 | 9,530599507  | 11,42544849 | 0,022618 | -1,296649879 | 0,012967845  | -0,846043873 | HLA-DRA  | ility compain-coding, th protein G00000204287    |
| 64146     | 0,004035785  | 0,00360791 | 0,130283929 | -0,764623 | 8,946609408  | 9,711232451 | 0,055501 | -0,332803445 | 0,048174739  | -0,278847026 | PDF      | rmylase (main-coding, th protein G00000258429    |
| 6711      | 0,003839694  | 0,00360872 | 0,129934413 | -0,940228 | 10,05081755  | 10,9910457  | 0,312565 | -0,118968969 | 0,571968664  | -0,086145431 | SPTBN1   | ta, non-eryain-coding, th protein G00000115306   |
| 6102      | 0,005150611  | 0,00362227 | 0,130044173 | 1,2813028 | 9,182414897  | 7,901112106 | 0,070468 | 0,803797443  | 0,097612356  | 0,421902108  | RP2      | itosa 2 (X-)ain-coding, th protein G00000102218  |
| 488       | 0,00190352   | 0,00362853 | 0,129892472 | 0,5867759 | 10,84104707  | 10,25427113 | 0,140123 | 0,171762618  | 0,004418964  | 0,381450329  | ATP2A2   | plasmic retein-coding, th protein G00000174437   |
| 9412      | 0,005534501  | 0,00364574 | 0,130196641 | 0,6595835 | 8,727534043  | 8,067950585 | 0,006404 | 0,367358099  | 0,360718181  | 0,085022232  | MED21    | complex sein-coding, th protein G00000152944     |
| 9848      | 0,004788161  | 0,00365552 | 0,130099553 | 1,1595988 | 6,162714468  | 5,003115703 | 0,681258 | 0,200999319  | 0,282786447  | 0,532682144  | MFAP3L   | associatedein-coding, th protein G00000198948    |
| 29099     | 0,005497377  | 0,00365955 | 0,12987692  | -0,658209 | 7,822914895  | 8,48112399  | 0,044528 | -0,630835799 | 0,015077963  | -0,369914652 | COMMMD9  | lomain coain-coding, th protein G00000110442     |
| 676       | 0,00028842   | 0,00368587 | 0,130065652 | -1,210904 | 0            | 2,120903955 | 0,794421 | -0,171892225 | 0,707088202  | -0,091543363 | BRDT     | nain testis ain-coding, th protein G00000137948  |
| 100132474 | 0,000295294  | 0,00376623 | 0,132148442 | 4,4701725 | 4,470172504  | 0           | 0,866986 | 0,232363491  | 0,187222864  | 2,181875146  |          |                                                  |
| 55233     | 0,002785783  | 0,00377843 | 0,132202087 | 0,6572006 | 10,74389463  | 10,08669408 | 0,305854 | 0,363089354  | 0,080253663  | 0,205548682  | MOB1A    | inase activain-coding, th protein G00000114978   |
| 139221    | 0,003008114  | 0,00380828 | 0,132497933 | 1,153817  | 2,382256389  | 1,228439428 | 0,961198 | 0,050377385  | 0,241378712  | 0,435228414  | MUM1L1   | AUM1 like ain-coding, th protein G00000157502    |
| 9636      | 0,006035399  | 0,00382297 | 0,132636264 | 1,2709363 | 13,62610957  | 12,35517329 | 0,094397 | 0,645015288  | 0,13560201   | 0,452429457  | ISG15    | iquitin-likeain-coding, th protein G00000187608  |
| 23180     | 0,002470588  | 0,00383135 | 0,132555595 | -0,563326 | 8,543851325  | 9,107177787 | 0,166293 | -0,12847817  | 0,705949911  | 0,031934924  | RFTN1    | lipid raft lein-coding, th protein G00000131378  |
| 10720     | 0,004237699  | 0,00384156 | 0,132538697 | -0,816625 | 5,794687569  | 4,978662427 | 0,241413 | -0,25719367  | 0,295357813  | 0,129655481  | UGT2B11  | nsferase fain-coding, th protein G00000213759    |
| 127428    | 0,005434793  | 0,00386017 | 0,132810876 | -0,916197 | 5,637390634  | 6,553587311 | 0,364861 | -0,471744809 | 0,677453448  | -0,104004587 | TCEANC2  | N-terminalain-coding, th protein G00000116205    |
| 780       | 0,006175148  | 0,00386882 | 0,132373182 | -0,706661 | 6,785506459  | 7,49216742  | 0,060316 | -0,256253958 | 0,159736222  | -0,173208844 | DDR1     | receptor ain-coding, th protein G00000204580     |
| 148206    | 0,006076552  | 0,00388109 | 0,132427079 | -0,771198 | 7,353660233  | 8,125660619 | 0,022971 | -1,187943343 | 0,323193918  | 0,165694265  | ZNF714   | nger proteain-coding, th protein G00000160352    |
| 7374      | 0,003991056  | 0,00388989 | 0,132362562 | -1,164224 | 7,94038771   | 9,104612136 | 0,016735 | -0,915014197 | 0,556076742  | -0,111208632 | UNG      | DNA glycoain-coding, th protein G00000076248     |
| 9801      | 0,005313949  | 0,00389568 | 0,132196663 | 1,1470033 | 10,09110646  | 8,944103182 | 0,03464  | 0,532659669  | 0,073395882  | 0,436478692  | MRPL19   | l ribosomain-coding, th protein G00000115364     |
| 4751      | 0,0044099    | 0,00396879 | 0,133579422 | 0,7064218 | 8,459049122  | 7,752627289 | 0,122123 | 0,292845767  | 0,006713951  | 0,43587329   | NEK2     | related kirain-coding, th protein G00000117650   |
| 9743      | 0,003671657  | 0,00398323 | 0,133702289 | -0,881663 | 7,003809755  | 7,885472812 | 0,045737 | -0,629230401 | 0,225441772  | 0,111376445  | ARHGAP32 | activatingain-coding, th protein G00000134909    |
| 6631      | 0,000968532  | 0,00398628 | 0,133442893 | 1,8035898 | 13,46065345  | 11,65706361 | 0,004778 | 1,525546842  | 0,785118919  | -0,067378735 | SNRPC    | nucleoprotein-coding, th protein G00000124562    |
| 1832      | 0,002641777  | 0,00399007 | 0,133209795 | -1,203085 | 8,132441528  | 9,335526448 | 0,017771 | -0,638246499 | 0,013182887  | -1,148462436 | DSP      | lesmoplakain-coding, th protein G00000096696     |
| 54955     | 0,006299954  | 0,00400316 | 0,13328759  | 0,6072198 | 6,908798831  | 6,301579051 | 0,040777 | 0,219220997  | 0,085988143  | 0,214380859  | C1orf109 | l open reacein-coding, th protein G00000116922   |
| 56674     | 0,000807437  | 0,00410902 | 0,136080744 | -1,896918 | 7,068176974  | 8,965095023 | 0,025514 | -1,140702793 | 0,404714529  | -0,048099053 | TMEM9B   | main familain-coding, th protein G00000175348    |
| 25801     | 0,001338206  | 0,0041463  | 0,136222412 | -1,246682 | 7,06048739   | 8,307169671 | 0,00567  | -0,697220555 | 0,267174758  | -0,140460448 | GCA      | granalcain-coding, th protein G00000115271       |
| 343521    | 0,006359168  | 0,00414942 | 0,135964308 | 0,6018794 | 7,735395696  | 7,133516306 | 0,316126 | 0,463381068  | 0,380884546  | 0,086939035  | TCXET1D4 | omain coain-coding, th protein G00000188396      |
| 4722      | 0,001360653  | 0,00417295 | 0,136374532 | 0,5310497 | 12,0016332   | 11,47058845 | 0,105347 | 0,330397489  | 0,767246383  | -0,045152831 | NDUFS3   | xidoreductin-coding, th protein G00000213619     |
| 6453      | 0,000995256  | 0,00420416 | 0,136673413 | -0,549119 | 7,795388223  | 8,344507247 | 0,022422 | -0,170643101 | 0,8070865073 | 0,01028727   | ITSN1    | ntersectin ain-coding, th protein G00000205726   |
| 118429    | 0,00577444   | 0,00422825 | 0,137096784 | 0,7194858 | 8,818364937  | 8,09887916  | 0,067078 | 0,423269664  | 0,044887734  | 0,271163203  | ANTXR2   | x toxin reacein-coding, th protein G00000163297  |
| 55751     | 0,00352988   | 0,00423905 | 0,137087887 | -0,625005 | 7,290523143  | 7,91552817  | 0,196423 | -0,381403205 | 0,443169488  | 0,079357281  | TMEM184  | lbrane proain-coding, th protein G00000164168    |
| 100131174 | 0,001581775  | 0,00424208 | 0,136828708 | 2,8818099 | 3,172030098  | 2,90220209  | 0,489432 | -1,06412289  | 0,004854766  | 3,178992975  |          |                                                  |
| 56940     | 0,006651194  | 0,00429832 | 0,137567861 | 0,6252521 | 7,934446048  | 7,309193992 | 0,002762 | 0,39466128   | 0,373268104  | 0,086508816  | DUSP22   | ficity phosphain-coding, th protein G00000112679 |
| 81853     | 0,002938279  | 0,00429959 | 0,137254032 | -0,791069 | 5,366479976  | 6,15754857  | 0,05817  | -0,436060296 | 0,581277379  | 0,076061181  | TMEM14B  | lbrane preain-coding, th protein G00000137210    |
| 51258     | 0,00039513   | 0,00432703 | 0,137775016 | -1,079133 | 12,54849572  | 13,62762844 | 0,189466 | -0,169777141 | 0,919686821  | 0,008992701  | MRPL51   | l ribosomain-coding, th protein G00000111639     |
| 55905     | 0,003854779  | 0,00433212 | 0,1375834   | 0,7343023 | 10,894274943 | 8,995447121 | 0,044422 | 0,316531255  | 0,186955453  | 0,104538889  | RNF114   | nger proteain-coding, th protein G00000124226    |
| 148641    | 0,006768045  | 0,00438326 | 0,138851473 | -0,818531 | 7,942198242  | 8,760729716 | 0,035305 | -0,53145384  | 0,520084414  | -0,100799957 | SLC35F3  | r family 35ain-coding, th protein G00000183780   |
| 11230     | 0,006589573  | 0,00438401 | 0,138520923 | 0,766856  | 8,878278231  | 8,111422277 | 0,039524 | 0,680738183  | 0,406729086  | 0,110966521  | PRAF2    | ain family ain-coding, th protein G00000243279   |
| 10491     | 0,005908801  | 0,00443316 | 0,138961193 | -0,618303 | 10,04186187  | 10,66016526 | 0,149011 | -0,36380011  | 0,365700001  | -0,124972151 | CRTAP    | ssociateain-coding, th protein G00000170275      |
| 254359    | 0,003163553  | 0,00444104 | 0,138905473 | 0,6332858 | 10,58221721  | 9,94893139  | 0,016326 | 0,296158634  | 0,005067004  | 0,356781672  | ZDHHC24  | HHC-type ain-coding, th protein G00000174165     |

|           |             |            |             |           |             |             |          |              |             |              |                                                         |
|-----------|-------------|------------|-------------|-----------|-------------|-------------|----------|--------------|-------------|--------------|---------------------------------------------------------|
| 8508      | 0,006436712 | 0,00444599 | 0,138709849 | -0,684631 | 6,380529134 | 7,065160513 | 0,199125 | -0,145508242 | 0,143965216 | -0,195199008 | NIPSNAP1 homolog 1 (ein-coding, th protein G00000184117 |
| 10810     | 0,001825917 | 0,00444894 | 0,138453165 | 0,6015543 | 7,010005093 | 6,408450801 | 0,575489 | 0,133981756  | 0,016712324 | 0,455585125  | WASF3 ein family ein-coding, th protein G00000132970    |
| 401409    | 0,004019858 | 0,00445274 | 0,13822433  | 2,0096785 | 3,342488389 | 1,33280987  | 0,316675 | 0,912923308  | 0,342807189 | 0,52438373   | RAB19 ser RAS onein-coding, th protein G00000146955     |
| 10534     | 0,002526188 | 0,00447537 | 0,13857949  | 0,6878125 | 11,77074073 | 11,08292819 | 0,073397 | 0,135848542  | 0,090124106 | 0,116015673  | SSSCA1 y/sclerodersein-coding, th protein G00000173465  |
| 5727      | 0,006666905 | 0,00447653 | 0,138269599 | -0,660826 | 6,841119565 | 6,841119565 | 0,06203  | -0,331529865 | 0,071744331 | -0,255308488 | PTCH1 patched 1 ein-coding, th protein G000001385920    |
| 414777    | 0,006791255 | 0,00448504 | 0,138187845 | 0,6103017 | 10,17817717 | 9,567875431 | 0,322811 | 0,154137905  | 0,071030077 | 0,249540337  | HCG18 up 18 (non-coding Rlong non-cG00000231074         |
| 10007     | 0,006808648 | 0,00448762 | 0,137924182 | -0,646862 | 8,817791812 | 9,46465384  | 0,338235 | -0,144276144 | 0,575978711 | -0,060836612 | GNPDA1 i-phosphataein-coding, th protein G00000113552   |
| 55752     | 0,005892674 | 0,00450045 | 0,137976216 | -0,797726 | 10,4021514  | 11,19987749 | 0,166808 | -0,247951283 | 0,891203893 | 0,016917526  | SEPT11 septin 11 ein-coding, th protein G00000138758    |
| 79140     | 0,001406798 | 0,00450441 | 0,137417204 | 1,120852  | 9,100854053 | 7,980002024 | 0,025199 | 0,46495395   | 0,176705567 | 0,220737592  | CCDC28B domain corsein-coding, th protein G00000160050  |
| 10663     | 0,002317129 | 0,00452971 | 0,137849594 | -1,139872 | 3,628718397 | 4,768590274 | 0,446979 | -0,376150389 | 0,165938126 | -0,74408393  | CXCR6 chemokinein-coding, th protein G00000172215       |
| 8407      | 0,005055465 | 0,00453692 | 0,137730575 | -1,491765 | 10,83817858 | 12,32994405 | 0,029599 | -0,690103056 | 0,200523327 | -0,242243002 | TAGLN2 transgelin 2 ein-coding, th protein G00000158710 |
| 1368      | 0,003877769 | 0,00454299 | 0,13757782  | 0,6237977 | 5,502805814 | 4,879008151 | 0,425435 | 0,221117786  | 0,460119758 | 0,200226722  | CPM xyptidasein-coding, th protein G00000135678         |
| 100507431 | 0,003386655 | 0,00454703 | 0,137364177 | -1,585151 | 3,717793778 | 5,302944877 | 0,236959 | -0,44137407  | 0,014986674 | -0,703598529 |                                                         |
| 153577    | 0,00161015  | 0,00454714 | 0,137033315 | 4,1888364 | 4,613864594 | 4,25028182  | 0,803555 | 0,212686582  | 0,002092634 | 4,105434068  |                                                         |
| 389084    | 0,002920585 | 0,00456306 | 0,13719438  | 1,0890516 | 7,250173153 | 6,161121523 | 0,023777 | 0,966165243  | 0,358710681 | -0,248292574 | C2orf82 2 open reasin-coding, th protein G00000182600   |
| 79644     | 0,006996176 | 0,00459114 | 0,137356575 | -0,697214 | 8,815417262 | 9,512613676 | 0,739212 | -0,094988122 | 0,034648417 | -0,416740887 | SRD5A3 alpha-redin-coding, th protein G00000128039      |
| 8702      | 0,005526951 | 0,00460981 | 0,136923197 | 0,8384068 | 7,155101875 | 6,316695107 | 0,042619 | 0,659622013  | 0,333329263 | 0,149259749  | B4GALT4 alactosyltraein-coding, th protein G00000121578 |
| 10576     | 0,006500346 | 0,00464029 | 0,137498771 | 0,5645474 | 12,32392948 | 11,75938205 | 0,035953 | 0,200406971  | 0,030616842 | 0,260611816  | CCT2 containing Tain-coding, th protein G00000166226    |
| 55230     | 0,002808855 | 0,00469478 | 0,138450764 | -0,893691 | 7,024577964 | 7,918268584 | 0,091622 | -0,329126542 | 0,397501444 | -0,149422395 | USP40 specific pepin-coding, th protein G00000085982    |
| 50848     | 0,000793165 | 0,00469824 | 0,138223645 | -1,24871  | 6,793348514 | 8,042058305 | 0,015886 | -0,506761069 | 0,010787129 | -0,772504    | F11R 11 receptein-coding, th protein G00000158769       |
| 63926     | 0,006236044 | 0,00470471 | 0,138086201 | -0,698007 | 5,745102626 | 6,443109784 | 0,148352 | -0,67063302  | 0,714388773 | 0,040940944  | ANKEF1 EF-hand dsein-coding, th protein G00000132623    |
| 8774      | 0,004207917 | 0,00471166 | 0,138107956 | 1,0670575 | 8,807845401 | 8,807845401 | 0,059832 | 0,486256502  | 0,194604834 | 0,256830503  | NAPG ment protein-coding, th protein G00000134265       |
| 6291      | 0,006861791 | 0,00471999 | 0,137881156 | -1,629591 | 6,675286723 | 8,304877541 | 0,235553 | -0,500627673 | 0,55263404  | -0,188504407 | SAA4 yloid A4, cein-coding, th protein G00000148965     |
| 404636    | 0,000623183 | 0,00476941 | 0,138670603 | -1,660496 | 10,14428931 | 11,80478569 | 0,013813 | -1,909659465 | 0,15420164  | -0,191214311 | FAM45A nce similaein-coding, th protein G00000119979    |
| 54865     | 0,002232348 | 0,00476992 | 0,138360731 | 0,7385256 | 10,53406986 | 9,795544276 | 0,452885 | 0,167003306  | 0,366883305 | 0,189109808  | GPATCH4 domain corsein-coding, th protein G00000160818  |
| 84959     | 0,003734674 | 0,00478937 | 0,138600237 | 1,1086378 | 8,322485582 | 7,21384779  | 0,023595 | 0,578895908  | 0,013929505 | 0,652338684  | UBASH3B 1 and SH3 ein-coding, th protein G00000154127   |
| 653650    | 0,000437547 | 0,00481392 | 0,138662866 | 0,6521018 | 8,01989816  | 7,367796409 | 0,00168  | 0,619397057  | 0,090687754 | 0,100716405  | PDPK2P ndent protseudogenG00000205918                   |
| 3956      | 0,001708221 | 0,00482008 | 0,138518229 | 0,5573049 | 15,65088224 | 15,09357739 | 0,512823 | 0,098861119  | 0,677930497 | 0,029118574  | LGALS1 galectin 1 ein-coding, th protein G00000100097   |
| 677844    | 0,007435284 | 0,00484546 | 0,138864707 | 0,549711  | 12,74768647 | 12,19797647 | 0,406168 | 0,061206524  | 0,011576501 | 0,598469245  | SNORA78 lar RNA, Hn-coding Rl small nuclG00000273587    |
| 25983     | 0,005318715 | 0,00487558 | 0,139150814 | 0,5641423 | 10,02968657 | 9,46554426  | 0,159395 | 0,211002086  | 0,25119798  | 0,16906627   | NGDN neuroguidin ein-coding, th protein G00000129460    |
| 9839      | 0,004350224 | 0,00490326 | 0,139292682 | 0,7760401 | 6,52635307  | 5,75031294  | 0,031621 | 0,447410373  | 0,215901787 | 0,184310753  | ZEB2 ox bindingein-coding, th protein G00000169554      |
| 100528032 | 0,005134035 | 0,00490932 | 0,13914551  | -1,124463 | 3,965299586 | 5,089763049 | 0,478121 | -0,256389056 | 0,131564702 | -0,682520824 | LRC4-KLRK1 read other eadthrougG00000255819             |
| 4154      | 0,004930529 | 0,00492813 | 0,139359961 | 0,8882328 | 9,66616328  | 8,777930472 | 0,152722 | 0,202008179  | 0,284819112 | 0,17212746   | MBNL1 like splicingein-coding, th protein G00000152601  |
| 64393     | 0,006830443 | 0,00492952 | 0,139081767 | 0,7156247 | 6,358189277 | 5,642564598 | 0,018736 | 0,366528067  | 0,033105726 | 0,392859197  | ZMAT3 ger matrin ein-coding, th protein G00000172667    |
| 9686      | 0,00759616  | 0,00495908 | 0,139281057 | -0,566174 | 7,412796245 | 7,97897042  | 0,712526 | -0,083911262 | 0,019505685 | -0,361491018 | VGLL4 ike family rein-coding, th protein G00000144560   |
| 56951     | 0,003090161 | 0,00499394 | 0,139312473 | -1,021016 | 7,7883497   | 8,809365414 | 0,001705 | -0,84255302  | 0,498834351 | 0,110700887  | CSorf15 5 open reasin-coding, th protein G00000113583   |
| 51280     | 0,001142767 | 0,005039   | 0,139939142 | -1,394748 | 8,660078281 | 10,05482676 | 0,010962 | -0,549832498 | 0,550526426 | -0,098528795 | GOLM1 embrane pain-coding, th protein G00000135052      |
| 1808      | 0,003699337 | 0,00505133 | 0,139967681 | -0,874538 | 8,539023051 | 9,41356059  | 0,160729 | -0,219931779 | 0,026655428 | -0,482630039 | DPYSL2 pyrimidinain-coding, th protein G00000092964     |
| 8611      | 0,001148729 | 0,00511022 | 0,140033274 | 0,8352857 | 10,00022661 | 9,164940923 | 0,013002 | 0,609016435  | 0,23473522  | -0,148273683 | PLPP1 lipid phoscein-coding, th protein G00000067113    |
| 114876    | 0,000848241 | 0,00514493 | 0,140673037 | -0,5949   | 7,593904567 | 8,18880428  | 0,108053 | -0,269175326 | 0,001577669 | -0,152516514 | OSBPL1A nding protein-coding, th protein G00000141447   |
| 9804      | 0,006767615 | 0,00514599 | 0,140392181 | -0,572725 | 9,023505675 | 9,596230227 | 0,000379 | -0,421918432 | 0,172396039 | -0,159699195 | TOMM20 r mitochondsein-coding, th protein G00000173726  |
| 9572      | 0,007440647 | 0,00514912 | 0,140168797 | 0,6113144 | 7,677021309 | 7,065706882 | 0,017045 | 0,555197571  | 0,370293323 | 0,082811573  | NR1D1 bfamily 1 ein-coding, th protein G00000126368     |
| 10950     | 0,006482932 | 0,00518445 | 0,140821154 | 0,8788626 | 9,336660607 | 8,45779802  | 0,005245 | 0,666940228  | 0,111691422 | 0,299144643  | BTG3 proliferationein-coding, th protein G00000154640   |
| 2768      | 0,007806595 | 0,00518941 | 0,140647225 | 0,557275  | 9,347143991 | 8,789868979 | 0,214575 | 0,274311603  | 0,815459917 | 0,023496287  | GNA12 in subunit ain-coding, th protein G00000146535    |
| 5127      | 0,003701116 | 0,00519918 | 0,14060434  | -0,56955  | 9,536170076 | 10,10571994 | 0,010045 | -0,271647077 | 0,054006227 | 0,241948017  | CDK16 pendent kein-coding, th protein G00000102225      |
| 115704    | 0,006317271 | 0,00521166 | 0,140634809 | 0,5650461 | 7,098115824 | 6,533069733 | 0,026697 | 0,205372431  | 0,031773128 | 0,236090933  | EVISL al integratin-coding, th protein G00000142459     |
| 10093     | 0,007613349 | 0,00522748 | 0,140145788 | 0,7164635 | 8,131562123 | 7,415168636 | 0,022134 | 0,25129354   | 0,116999204 | 0,210722422  | ARPC4 tein 2/3 cein-coding, th protein G00000241553     |
| 10329     | 0,005876466 | 0,00523627 | 0,140078277 | -0,766853 | 7,758994618 | 8,525847658 | 0,003293 | -0,394965425 | 0,023303858 | 0,35244251   | LMEM5 embrane pain-coding, th protein G00000118600      |
| 344657    | 0,007373246 | 0,00525405 | 0,140250921 | 2,5058926 | 3,055431894 | 0,549539285 | 0,941234 | 0,115068532  | 0,291843257 | 1,837007078  | TRIRIQ4 its and IQ rein-coding, th protein G00000188306 |
| 92292     | 0,007813484 | 0,00527165 | 0,14041808  | -1,277287 | 3,693082673 | 4,970369671 | 0,41416  | -0,614189794 | 0,263142479 | -0,334290335 | GLYATL1 acyltransfein-coding, th protein G00000166840   |
| 1948      | 0,002885086 | 0,00527498 | 0,140205377 | 0,7234553 | 8,329308299 | 7,605853009 | 0,721753 | -0,037151721 | 0,200028876 | -0,158086432 | EFNB2 ephrin B2 ein-coding, th protein G00000125266     |
| 8698      | 0,001606695 | 0,00531076 | 0,140253336 | -0,770965 | 6,07931693  | 6,850281718 | 0,16339  | -0,33625172  | 0,025058537 | -0,381888351 | S1PR4 1-phosphain-coding, th protein G00000125910       |
| 205       | 0,002279138 | 0,00533064 | 0,140180631 | -0,672631 | 9,146781986 | 9,819412549 | 0,446547 | -0,137445393 | 0,262841278 | -0,207810818 | AK4 nylate kinain-coding, th protein G00000162433       |
| 9673      | 0,00800954  | 0,00534354 | 0,140222101 | 0,533053  | 7,543588376 | 7,010535382 | 0,014599 | 0,362403312  | 0,040910614 | 0,271551574  | SLC25A44 r family 25ein-coding, th protein G00000160785 |
| 94081     | 0,006688728 | 0,00536012 | 0,140063675 | 0,5069162 | 10,22998606 | 9,723069847 | 0,10641  | 0,229322496  | 0,0305038   | 0,638556564  | SFXN1 ideroflexin ain-coding, th protein G00000164466   |
| 10047     | 0,003623555 | 0,00537063 | 0,139748701 | 1,1505844 | 4,248130289 | 3,097545855 | 0,113191 | 0,841805896  | 0,544559548 | 0,164777353  | CST8 cystatin 8 ein-coding, th protein G00000125815     |
| 170392    | 0,006021525 | 0,00544136 | 0,140996856 | 0,5185166 | 5,095141182 | 4,576624607 | 0,88182  | 0,047178395  | 0,427237436 | 0,272907374  | OIT3 n induced ein-coding, th protein G00000138315      |
| 390667    | 0,004144726 | 0,0054724  | 0,141210388 | 0,7513402 | 5,348853774 | 4,597513564 | 0,015563 | 0,572246816  | 0,687255727 | 0,060099214  | PTX4 pentraxin 4 ein-coding, th protein G00000251692    |
| 100130342 | 0,002410924 | 0,00549329 | 0,141161249 | 0,6105432 | 4,671113933 | 4,060570697 | 0,986316 | 0,006904004  | 0,181386791 | 0,402813613  | SCGB2B3Ply 2B memseudogenG00000269811                   |

|           |             |            |             |           |             |             |          |              |             |              |           |                                                                  |                         |
|-----------|-------------|------------|-------------|-----------|-------------|-------------|----------|--------------|-------------|--------------|-----------|------------------------------------------------------------------|-------------------------|
| 3251      | 0,001066102 | 0,00550614 | 0,141198342 | -0,914354 | 9,457793629 | 10,37214775 | 0,086278 | -0,202416734 | 0,930035486 | -0,006982087 | HPRT1     | hypoxanthine phosphoribosyl transferase                          | th protein G00000165704 |
| 100170229 | 0,008254114 | 0,00552052 | 0,140983284 | 0,6589281 | 8,22239998  | 7,563471901 | 0,334962 | 0,14345484   | 0,487710268 | 0,086685332  | SRRM5     | serine repeat element binding protein                            | th protein G00000226763 |
| 25850     | 0,004628251 | 0,00553322 | 0,141017085 | -0,624521 | 6,212993733 | 6,837515009 | 0,021625 | -0,418715445 | 0,419981148 | -0,082028017 | ZNF345    | zinc finger protein                                              | th protein G00000251247 |
| 100130713 | 0,008358682 | 0,00556745 | 0,141597981 | 0,6955523 | 6,790312675 | 6,09476042  | 0,020145 | 0,663731198  | 0,732443411 | -0,043903954 |           |                                                                  |                         |
| 6364      | 0,005482446 | 0,00560952 | 0,141794386 | 1,1704226 | 5,854365317 | 4,683942751 | 0,586326 | 0,185079483  | 0,233608788 | 0,386727958  | CCL20     | chemokine                                                        | th protein G00000115009 |
| 3017      | 0,004615595 | 0,00565982 | 0,142774654 | -1,67897  | 9,964108771 | 11,64307876 | 0,396982 | -0,405218076 | 0,008246209 | -1,41200835  | HIST1H2BD | histone H2B                                                      | th protein G00000158373 |
| 83876     | 0,004792719 | 0,00568103 | 0,142728113 | 0,660654  | 5,068158574 | 4,407504527 | 0,135412 | 0,412147072  | 0,775901568 | 0,062261267  | MRO       | maestro                                                          | th protein G00000134042 |
| 23075     | 0,000750191 | 0,00568551 | 0,142551515 | -1,415029 | 7,507609912 | 8,922639145 | 0,001379 | -1,255891143 | 0,866942949 | -0,0173781   | SWAP70    | SWAP70                                                           | th protein G00000133789 |
| 6809      | 0,005463397 | 0,00569275 | 0,14244484  | -0,553736 | 9,42373724  | 9,977473679 | 0,053758 | -0,304533051 | 0,068315092 | -0,149336197 | STX3      | syntrophin 3                                                     | th protein G00000166900 |
| 100129405 | 0,007107237 | 0,00569672 | 0,141970436 | 0,5722862 | 9,160985097 | 8,588689837 | 0,019355 | 0,315938845  | 0,015985746 | 0,318006174  | MSTO2P    | member 2 of the serine/threonine kinase family                   | th protein G00000203761 |
| 89765     | 0,008386574 | 0,00570138 | 0,141801326 | 0,6616269 | 4,813917887 | 4,152290949 | 0,150448 | 0,303410141  | 0,191184165 | 0,214769515  | RSPH1     | retinitis pigmentosa protein 1                                   | th protein G00000160188 |
| 256987    | 0,001049577 | 0,00573053 | 0,142240762 | -0,99965  | 6,279219674 | 7,278870124 | 0,002012 | -0,686417016 | 0,531767773 | 0,077314422  | SERINC5   | serine incorporin                                                | th protein G00000164300 |
| 152302    | 0,006649837 | 0,0057386  | 0,142156116 | 1,6591657 | 9,290151848 | 7,630986173 | 0,002332 | 1,117532542  | 0,201349009 | 0,306056475  | CIDECP    | cytoskeleton-associated protein                                  | th protein G00000186162 |
| 740       | 0,007089868 | 0,00574358 | 0,141995442 | 0,6380823 | 8,54612725  | 7,908044987 | 0,989828 | -0,002718444 | 0,14588202  | 0,197376461  | MRPL49    | mitochondrial ribosomal protein L49                              | th protein G00000149792 |
| 6464      | 0,008598153 | 0,00576622 | 0,142271342 | 0,6865836 | 9,366772159 | 6,880188601 | 0,009523 | 0,380936399  | 0,131698057 | 0,209777103  | SHC1      | SHC1                                                             | th protein G00000160691 |
| 128486    | 0,005526199 | 0,00581095 | 0,142523106 | 0,6001738 | 8,320109594 | 7,719935797 | 0,067857 | 0,221646178  | 0,563715444 | 0,067761409  | FITM2     | fitronin 2                                                       | th protein G00000197296 |
| 84447     | 0,003841302 | 0,00583738 | 0,142888495 | 0,6461364 | 9,480778939 | 8,834642524 | 0,005143 | 0,569263694  | 0,166838474 | 0,189397635  | SYVN1     | synoviolin                                                       | th protein G00000162298 |
| 1073      | 0,006239627 | 0,0058418  | 0,142714541 | 0,6824006 | 9,201702434 | 8,519301863 | 0,154892 | 0,471806472  | 0,619437521 | -0,060823475 | CFL2      | cofilin 2                                                        | th protein G00000165410 |
| 138199    | 0,00869161  | 0,00584785 | 0,14258129  | -0,687791 | 7,158073559 | 7,845864689 | 0,250109 | -0,611570577 | 0,019350858 | -0,643408618 | CARNMT1   | CARNMT1                                                          | th protein G00000156017 |
| 100130111 | 0,008678634 | 0,00586681 | 0,142762421 | -0,581009 | 7,251006543 | 7,832015174 | 0,550074 | -0,107516557 | 0,087729347 | -0,292105428 |           |                                                                  |                         |
| 3115      | 0,001921685 | 0,00593784 | 0,143925388 | -0,993588 | 10,40223089 | 11,39581923 | 0,11555  | -0,232145519 | 0,009859543 | -0,661568616 | HLA-DPB1  | HLA class II DPB1                                                | th protein G00000223865 |
| 1054      | 0,005610151 | 0,00597695 | 0,144590258 | 0,638619  | 9,725023683 | 9,086404707 | 0,155876 | 0,275453226  | 0,0504586   | 0,365116565  | CEBPG     | CCAAT/enhancer binding protein gamma                             | th protein G00000153879 |
| 6941      | 0,001137392 | 0,00602116 | 0,144811351 | -0,738476 | 6,898479532 | 7,636955801 | 0,007285 | -0,711505705 | 0,280186272 | -0,142062256 | TCF19     | transcription factor 19                                          | th protein G00000137310 |
| 283692    | 0,008497189 | 0,00603132 | 0,144774714 | 4,4411478 | 4,976439013 | 5,35291189  | 0,433936 | 1,371764887  | 0,008821426 | 0,875155558  | CPEB1-AS1 | cytoplasmic polyoma virus enhancer binding protein 1 antisense 1 | th protein G00000259462 |
| 374654    | 0,003750686 | 0,00604377 | 0,144792866 | 0,7181609 | 5,587157136 | 4,868996241 | 0,612129 | 0,082867094  | 0,014910999 | 0,639141356  | KIF7      | kinesin family member 7                                          | th protein G00000166813 |
| 8220      | 0,002154193 | 0,00605298 | 0,144733492 | 0,8622033 | 7,304435618 | 6,442232341 | 0,042914 | 0,222707136  | 0,086979143 | 0,302709972  | DGCR14    | diGeorge syndrome critical region 14                             | th protein G00000100056 |
| 27090     | 0,008679049 | 0,00606654 | 0,144751047 | 0,7156537 | 9,195756244 | 8,480102507 | 0,008984 | 0,280617816  | 0,019370523 | 0,280558192  | TGALNAC1  | transmembrane glycoprotein                                       | th protein G00000136840 |
| 22949     | 0,007343174 | 0,00607533 | 0,144709172 | -0,66212  | 10,24856896 | 10,91068895 | 0,025984 | -0,454304907 | 0,004625852 | -0,73034244  | PTGR1     | protein tyrosine phosphatase                                     | th protein G00000106853 |
| 729830    | 0,005559754 | 0,00610234 | 0,144795684 | -0,616875 | 5,674614442 | 6,291489626 | 0,023244 | -0,366535561 | 0,263672858 | -0,106072076 | FAM160A   | family with sequence similarity 160 member A                     | th protein G00000161412 |
| 11217     | 0,009031077 | 0,00611171 | 0,144740608 | 0,6838494 | 8,435974181 | 7,752124814 | 0,063605 | 0,293604203  | 0,231799223 | 0,153143514  | AKAP2     | anchorage site 2                                                 | th protein G00000241978 |
| 55300     | 0,003390102 | 0,00613172 | 0,144515505 | -0,803557 | 7,723615593 | 8,52717215  | 0,056916 | -0,587664158 | 0,157052401 | 0,256859525  | PI4K2B    | phosphatidylinositol 4-kinase class II beta                      | th protein G00000038210 |
| 55272     | 0,004390678 | 0,00614829 | 0,144501759 | -0,853748 | 11,16348438 | 12,01723225 | 0,010627 | -0,720994196 | 0,34764061  | 0,136037437  | IMP3      | importin 3                                                       | th protein G00000177971 |
| 5395      | 0,005966191 | 0,0061539  | 0,144086986 | -0,609381 | 6,488169448 | 7,097550099 | 0,290806 | -0,384109555 | 0,633966382 | 0,060391576  | PM52      | protein phosphatase 52                                           | th protein G00000122512 |
| 153527    | 0,007764632 | 0,00616283 | 0,144023777 | -0,544572 | 9,529078061 | 10,07365047 | 0,169837 | -0,345421878 | 0,140528625 | -0,382891044 | ZMAT2     | zinc finger matrin 2                                             | th protein G00000146007 |
| 93082     | 0,004553447 | 0,00617683 | 0,144078981 | -0,721134 | 6,373881474 | 7,095014999 | 0,973242 | -0,005952502 | 0,007556583 | -0,348421911 | NEURL3    | neuronal ubiquitin ligase 3                                      | th protein G00000163121 |
| 2896      | 0,003291176 | 0,00621871 | 0,144240942 | -0,62569  | 10,56365407 | 11,18934396 | 0,194829 | -0,160399929 | 0,006059288 | -0,41287614  | GRN       | granulin                                                         | th protein G00000030582 |
| 154141    | 0,008241272 | 0,00626594 | 0,144794091 | -1,858534 | 3,595199161 | 5,453732857 | 0,065028 | -0,917850407 | 0,393661685 | 0,228472029  | MBOAT1    | lysophosphatidylcholine acyltransferase 1                        | th protein G00000172197 |
| 5218      | 0,006191117 | 0,00631297 | 0,145338752 | 0,5496307 | 6,374941831 | 5,825311161 | 0,26653  | 0,157185107  | 0,01275405  | 0,482524513  | CDK14     | cyclin dependent kinase 14                                       | th protein G00000058091 |
| 8898      | 0,00929392  | 0,00632599 | 0,145368183 | 0,6299512 | 9,389311851 | 8,759360675 | 0,27636  | 0,14978925   | 0,123741321 | 0,216188943  | MTMR2     | metatransmembrane 2                                              | th protein G00000087053 |
| 390321    | 0,006443088 | 0,00635205 | 0,145427395 | 1,9289341 | 4,949582852 | 3,020648794 | 0,091954 | 1,369598504  | 0,370351194 | 0,525836506  | OR6C1     | olfactory receptor 6C1                                           | th protein G00000205330 |
| 9517      | 0,0026409   | 0,00637018 | 0,145305244 | -0,883124 | 7,102087386 | 7,985211201 | 0,002049 | -0,404320087 | 0,588099642 | -0,068500593 | SPTLC2    | spermatocyte-specific tubulin-like cytoskeleton 2                | th protein G00000100596 |
| 136227    | 0,003792415 | 0,00638396 | 0,145085285 | 0,5573085 | 5,949457243 | 5,392148758 | 0,127233 | 0,387240073  | 0,837806217 | -0,037177422 | COL26A1   | collagen type XXVI alpha 1                                       | th protein G00000160963 |
| 5251      | 0,007967373 | 0,00639627 | 0,144833639 | 1,5054767 | 3,919049982 | 2,413573275 | 0,21366  | 0,311532898  | 0,002680378 | 1,471132635  | PHEX      | phosphatase with ankyrin repeats                                 | th protein G00000102174 |
| 100132163 | 0,008367082 | 0,0063976  | 0,144599403 | -1,609499 | 3,005631244 | 4,615130183 | 0,289966 | -1,173632484 | 0,772176712 | -0,247999918 | PHKA2-AS1 | phosphoinositide 3-kinase class II alpha 2 antisense 1           | th protein G00000237836 |
| 3052      | 0,000946809 | 0,00641528 | 0,144734792 | 0,8496356 | 10,06903313 | 9,219397483 | 0,130684 | 0,299868719  | 0,002220302 | 0,365341574  | HCCS      | histone H4 chromatin-associated protein                          | th protein G00000004961 |
| 26658     | 0,009243481 | 0,00641983 | 0,144574209 | -0,704836 | 5,56838368  | 6,273219807 | 0,278806 | -0,464238037 | 0,784332207 | -0,055479537 | OR7C2     | olfactory receptor 7C2                                           | th protein G00000127529 |
| 51147     | 0,007132659 | 0,00643334 | 0,144615444 | -0,606894 | 6,980309207 | 7,587202912 | 0,166188 | -0,206837968 | 0,014609846 | -0,381799195 | ING4      | integrin-linked kinase 4                                         | th protein G00000111653 |
| 221       | 0,001097003 | 0,00646242 | 0,144743625 | -0,708266 | 6,734722256 | 7,442988308 | 0,73308  | -0,058819147 | 0,015813814 | -0,34420378  | ALDH3B1   | aldehyde dehydrogenase 3B1                                       | th protein G00000006534 |
| 2869      | 0,009433371 | 0,0065052  | 0,144915772 | 0,6457434 | 7,381755708 | 6,304723822 | 0,005794 | 0,304723822  | 0,061970845 | 0,305481525  | GRK5      | guanine nucleotide-binding protein-coupled receptor kinase 5     | th protein G00000198873 |
| 3035      | 0,002065287 | 0,00650677 | 0,144690476 | 0,543897  | 10,45334822 | 9,909451257 | 0,148408 | 0,118165051  | 0,073667516 | 0,184352992  | HARS      | lysine tRNA synthetase                                           | th protein G00000170445 |
| 403150    | 0,009184298 | 0,00654145 | 0,145200903 | 0,7763876 | 4,466152541 | 3,689764922 | 0,474907 | 0,296648842  | 0,508674215 | -0,234933517 |           |                                                                  |                         |
| 390429    | 0,000663056 | 0,00657378 | 0,145397519 | -2,652345 | 5           | 2,652344719 | 0,42265  | -1,822327021 | 0,694302132 | -0,830017698 | OR4N2     | olfactory receptor 4N2                                           | th protein G00000176294 |
| 140606    | 0,007263317 | 0,00659836 | 0,145421687 | 1,1490491 | 9,303493914 | 8,154444776 | 0,004562 | 0,521972411  | 0,059258452 | 0,391825913  | SELENOM   | selenoprotein M                                                  | (SELENOM)               |
| 5594      | 0,008423308 | 0,00664531 | 0,145421414 | 0,6025588 | 9,783462879 | 9,18090411  | 0,002904 | 0,496811009  | 0,406122826 | 0,094888783  | MAPK1     | mitogen-activated protein kinase 1                               | th protein G00000100030 |
| 2805      | 0,004335437 | 0,00666952 | 0,14543742  | 0,8028496 | 9,883023361 | 9,080173732 | 0,001814 | 0,421359101  | 0,03250208  | 0,482654172  | GOT1      | glutamate oxaloacetate transaminase 1                            | th protein G00000120053 |
| 29937     | 0,001839427 | 0,00670089 | 0,145608595 | -0,961372 | 11,21185395 | 12,17322642 | 0,002642 | -0,543627402 | 0,10527895  | -0,141816806 | NENF      | neurotrophin                                                     | th protein G00000117691 |
| 91801     | 0,009639679 | 0,00673918 | 0,146184236 | 0,7991086 | 7,081659474 | 6,282550829 | 0,775804 | 0,0843382    | 0,122784323 | 0,356587991  | ALKB8     | alkylating factor 8                                              | th protein G00000137760 |
| 388948    | 0,007476352 | 0,00677856 | 0,14678139  | 0,8220594 | 5,617390962 | 4,795331543 | 0,100603 | 0,572910417  | 0,771275471 | 0,089640697  | LINC01118 | long non-coding RNA                                              | th protein G00000222005 |
| 83478     | 0,009462843 | 0,00682068 | 0,147435713 | -0,931646 | 5,268784534 | 6,200430418 | 0,135315 | -0,604853713 | 0,974076478 | -0,004988394 | ARHGAP24  | arrestin domain family class B member 24                         | th protein G00000138639 |

|           |             |            |             |           |             |             |          |              |             |              |           |                                                                   |
|-----------|-------------|------------|-------------|-----------|-------------|-------------|----------|--------------|-------------|--------------|-----------|-------------------------------------------------------------------|
| 7633      | 0,008468524 | 0,00682787 | 0,147334069 | 0,7102148 | 6,779741681 | 6,069526927 | 0,428394 | 0,101408312  | 0,26169051  | 0,160129993  | ZNF79     | inger protein-coding, th protein G00000196152                     |
| 80183     | 0,009371624 | 0,00683977 | 0,147078296 | 0,7234303 | 4,533914155 | 6,08483874  | 0,088662 | 0,413120133  | 0,146738925 | 0,236360811  | ZNF79     | inger protein-coding, th protein G00000102445                     |
| 84830     | 0,009793684 | 0,00684208 | 0,146873105 | -0,606451 | 5,507091239 | 6,113541774 | 0,284072 | 0,318178848  | 0,145952783 | -0,475878304 | ADTRP     | dent TFPI rain-coding, th protein G0000011863                     |
| 84879     | 0,005700431 | 0,00686539 | 0,147118499 | 0,9120543 | 7,511558688 | 6,599504355 | 0,023783 | 0,48481298   | 0,009281131 | 0,466578823  | MFSD2A    | erfamily dein-coding, th protein G00000168389                     |
| 6450      | 0,008837552 | 0,00690695 | 0,147753401 | 0,7553897 | 7,648159829 | 6,892770139 | 0,0165   | 0,393507929  | 0,238363302 | -0,182046624 | SH3BGR    | ding glutamain-coding, th protein G00000185437                    |
| 90637     | 0,008493424 | 0,00694366 | 0,148282492 | 0,8717221 | 10,29489661 | 9,423174471 | 0,0404   | 0,575717143  | 0,102118645 | 0,276027539  | ZFAND2A   | n1-type cain-coding, th protein G00000178381                      |
| 92558     | 0,006042921 | 0,00695044 | 0,147917253 | 0,5557157 | 5,527428594 | 4,971712893 | 0,241366 | 0,49251825   | 0,934353315 | -0,027398354 | BICDL1    | y like cargain-coding, th protein G00000135127                    |
| 151987    | 0,003923002 | 0,00701031 | 0,147920559 | -0,835289 | 8,94764642  | 9,782935806 | 0,175827 | -0,438944466 | 0,929410346 | -0,015046392 | PPP4R2    | itase 4 reguin-coding, th protein G00000163605                    |
| 55033     | 0,009977153 | 0,00701752 | 0,147820909 | 0,8622836 | 9,368864198 | 8,506580642 | 0,079101 | 0,552860989  | 0,455307877 | 0,113210252  | FKBP14    | inding pccin-coding, th protein G00000106080                      |
| 23259     | 0,005897763 | 0,0070206  | 0,147634695 | -0,723375 | 7,107827413 | 7,831202396 | 0,153962 | -0,401312833 | 0,02971965  | -0,306892445 | DDHD2     | omain contin-coding, th protein G00000085788                      |
| 339221    | 0,008114471 | 0,00706717 | 0,148111183 | 0,6831007 | 5,941725255 | 5,258624567 | 0,151684 | -0,284211369 | 0,159316361 | 0,242490707  | ENPP7     | osphatasein-coding, th protein G00000182156                       |
| 10901     | 0,005200757 | 0,00708526 | 0,147989373 | -0,886342 | 8,207140483 | 9,093482974 | 0,351767 | 0,179228107  | 0,143284252 | -0,339066943 | DHRS4     | genase/recin-coding, th protein G00000157326                      |
| 114294    | 0,006483582 | 0,00708902 | 0,14781882  | -0,579976 | 8,507857949 | 9,087833686 | 0,077815 | -0,324976732 | 0,133351682 | -0,263047092 | LACTB     | atamase bein-coding, th protein G00000103642                      |
| 5476      | 0,00567457  | 0,00710828 | 0,147971183 | -0,551391 | 10,69570751 | 11,24709826 | 0,01724  | -0,260321158 | 0,20018843  | -0,146079405 | CTSA      | athepsin ain-coding, th protein G00000064601                      |
| 900       | 0,005364736 | 0,00716557 | 0,148913558 | -0,581704 | 8,114902526 | 8,696606654 | 0,088496 | -0,627469654 | 0,939787858 | 0,008281915  | CCNG1     | cyclin G1 ain-coding, th protein G00000113328                     |
| 728730    | 0,008961995 | 0,00719152 | 0,148953019 | -1,281429 | 5,486281325 | 6,767710672 | 0,201646 | -0,617592755 | 0,091184607 | -0,531568437 |           |                                                                   |
| 2068      | 0,009071043 | 0,00720605 | 0,149004751 | 0,507048  | 8,998706939 | 8,491658963 | 0,100786 | 0,316048914  | 0,442011953 | 0,101693521  | ERCC2     | FIH core cain-coding, th protein G00000104884                     |
| 219981    | 0,006707649 | 0,00720931 | 0,1488238   | 0,948232  | 5,191573337 | 4,243341331 | 0,319211 | 0,309964023  | 0,27824539  | 0,292712301  | OR5A2     | amily 5 sutin-coding, th protein G00000172324                     |
| 440275    | 0,010168662 | 0,00721164 | 0,14862409  | -0,715297 | 8,043569754 | 8,758867188 | 0,037178 | -0,312181603 | 0,27506118  | 0,140701775  | EIF2AK4   | initiation fin-coding, th protein G00000128829                    |
| 360132    | 0,005306743 | 0,00721273 | 0,148153629 | -0,86637  | 7,39590795  | 8,262277674 | 0,043696 | -0,549233075 | 0,033233005 | -0,276674266 | FKBP9P1   | ; protein 9 pseudogenseudogenG00000176826                         |
| 285282    | 0,010190579 | 0,00724163 | 0,148255408 | -0,592065 | 7,118538712 | 7,710603937 | 0,329099 | -0,23125257  | 0,279625004 | -0,173495853 | RABL3     | RAS oncogin-coding, th protein G00000144840                       |
| 5962      | 0,008811256 | 0,00725429 | 0,148269609 | 0,6517482 | 10,11594533 | 9,464197152 | 0,006914 | 0,5607128    | 0,816340899 | 0,031546771  | RDX       | radixin ain-coding, th protein G00000137710                       |
| 554249    | 0,006216419 | 0,00729116 | 0,148289069 | 0,6202575 | 9,083138688 | 8,462876404 | 0,03747  | 0,471530432  | 0,081625907 | 0,257932801  |           |                                                                   |
| 152189    | 0,001271701 | 0,00732223 | 0,148676831 | -1,123935 | 7,614288982 | 8,738223677 | 0,040947 | -0,522796995 | 0,352815301 | -0,058535653 | CMTM8     | ismembrain-coding, th protein G00000170293                        |
| 53838     | 0,007994562 | 0,00732265 | 0,148441999 | 0,6113624 | 9,211709807 | 8,600347456 | 0,396198 | 0,189457795  | 0,062088283 | -0,524623882 | C11orf24  | L1 open reain-coding, th protein G00000171067                     |
| 140849    | 0,001464393 | 0,00732392 | 0,147983244 | 0,5664628 | 8,45626991  | 7,889807135 | 0,272123 | 0,694617983  | 0,323157236 | -0,604759094 | INCO0266  | -jn-protein n-coding Rlong non-cG00000149656                      |
| 2067      | 0,008375525 | 0,007355   | 0,148369275 | 0,7022341 | 11,16276819 | 10,46053406 | 0,21191  | 0,131897207  | 0,412787357 | 0,089631174  | ERCC1     | ndonucleain-coding, th protein G0000012061                        |
| 6596      | 0,002120243 | 0,00735753 | 0,148178932 | -1,224764 | 7,03127651  | 8,256040102 | 0,066746 | -0,948430043 | 0,961032183 | -0,007643903 | HLTF      | e transcrip-coding, th protein G00000071794                       |
| 55856     | 0,010610828 | 0,00736038 | 0,147995839 | -0,535255 | 10,77055334 | 11,3058087  | 0,019413 | -0,214027471 | 0,198217297 | -0,141167295 | ACOT13    | A thioestein-coding, th protein G00000112304                      |
| 338620    | 0,003044293 | 0,00736399 | 0,147828274 | 0,7514781 | 8,030180964 | 7,278702908 | 0,102735 | 0,299912848  | 0,145312048 | 0,245145452  |           |                                                                   |
| 55062     | 0,010633289 | 0,00737872 | 0,147884388 | 0,8768044 | 9,280736616 | 8,403932212 | 0,001449 | 0,612451954  | 0,026717527 | 0,602163778  | WIP1      | phosphoin-coding, th protein G00000070540                         |
| 794       | 0,004443952 | 0,00740145 | 0,147623333 | -0,562391 | 11,17873401 | 11,74112494 | 0,483982 | -0,128683775 | 0,14237627  | -0,15715078  | CALB2     | calbindin 2in-coding, th protein G00000172137                     |
| 6595      | 0,005630697 | 0,00747142 | 0,148540388 | -0,59592  | 6,866464345 | 7,464563924 | 0,046293 | -0,395758671 | 0,735766599 | 0,039143792  | SMARCA2   | endent rein-coding, th protein G00000080503                       |
| 51776     | 0,007236768 | 0,00748551 | 0,148344437 | 0,5436764 | 8,49293915  | 7,94926272  | 0,042228 | 0,214898074  | 0,381934243 | 0,096541238  | ZAK       | sterile alpha motif and leucine zipper containing kinase AZK(ZAK) |
| 51441     | 0,002192585 | 0,00749216 | 0,148238992 | -1,283265 | 8,94205328  | 10,22531823 | 0,004568 | -0,730860792 | 0,048160395 | -0,523891192 | YTHDF2    | nosine RNain-coding, th protein G00000198492                      |
| 8776      | 0,007509955 | 0,00755087 | 0,148688034 | -0,514441 | 7,646337525 | 8,160778098 | 0,009694 | -0,246568254 | 0,888686537 | -0,012964708 | MTMR1     | irin relatecin-coding, th protein G00000063601                    |
| 55246     | 0,001573139 | 0,00763674 | 0,148958054 | -1,125218 | 8,713620163 | 9,838837727 | 0,038198 | -0,495653373 | 0,247770168 | -0,222894666 | CCDC25    | domain coain-coding, th protein G00000147419                      |
| 23212     | 0,009270659 | 0,00766217 | 0,148984922 | 0,808666  | 11,52530366 | 10,71663767 | 0,175126 | 0,226839279  | 0,407224823 | 0,146318222  | RRS1      | enesis reguin-coding, th protein G00000179041                     |
| 374286    | 0,010505666 | 0,00769101 | 0,148612394 | -0,641922 | 8,401801524 | 9,043723299 | 0,0093   | -0,410707726 | 0,013873914 | -0,459244705 | CDRT1     | ated regioin-coding, th protein G00000241322                      |
| 141       | 0,0104027   | 0,00772718 | 0,149078684 | -1,421275 | 4,043569378 | 5,464844269 | 0,11339  | -0,758981002 | 0,438937872 | -0,304722777 | ADPRH     | ylarginine ain-coding, th protein G00000144843                    |
| 51114     | 0,009769303 | 0,00772762 | 0,148855313 | -0,590981 | 7,608658973 | 8,199639634 | 0,009925 | -0,393043558 | 0,510020753 | 0,07669544   | ZDHHX9    | IHHC-type ain-coding, th protein G00000188706                     |
| 51569     | 0,006565953 | 0,00777329 | 0,149270844 | 0,5114839 | 9,648969495 | 9,137485615 | 0,063032 | 0,27472269   | 0,306440134 | 0,061845345  | UFM1      | in fold moain-coding, th protein G00000120686                     |
| 116154    | 0,00573341  | 0,00780141 | 0,149347645 | 0,5617249 | 4,932741082 | 4,371016188 | 0,121759 | 0,69908849   | 0,418808248 | -0,291131297 | PHACTR3   | e and actinain-coding, th protein G00000087495                    |
| 131870    | 0,008955224 | 0,00781332 | 0,149114659 | 0,5415745 | 8,484859164 | 7,943284641 | 0,040093 | 0,438921061  | 0,888458034 | 0,014543153  | NUDT16    | ix hydrolasain-coding, th protein G00000198585                    |
| 6728      | 0,005110999 | 0,00783721 | 0,149111207 | 0,541109  | 11,32591295 | 10,78480399 | 0,521044 | 0,126568461  | 0,077746005 | 0,224974385  | SRP19     | ognition pain-coding, th protein G00000153037                     |
| 84740     | 0,010590174 | 0,00784848 | 0,149096538 | 0,5317144 | 8,179052058 | 7,647337612 | 0,630152 | 0,053083998  | 0,019389121 | 0,39319911   | AFAP1-AS1 | antisense n-coding Rlong non-cG00000272620                        |
| 5908      | 0,003627258 | 0,00789476 | 0,149517116 | 0,9948661 | 10,22950331 | 9,234637255 | 0,011113 | 0,455640036  | 0,070171446 | 0,398503811  | RAP1B     | ir of RAS oain-coding, th protein G00000127314                    |
| 291       | 0,009776144 | 0,00790129 | 0,149184603 | 0,6386712 | 12,54785188 | 11,90918071 | 0,346113 | 0,204129479  | 0,097787846 | 0,300254741  | TLC25A4   | er family 2ain-coding, th protein G00000151729                    |
| 23102     | 0,01109163  | 0,00793411 | 0,149576237 | -0,504509 | 6,640863971 | 6,136354852 | 0,193615 | -0,282451805 | 0,40790894  | -0,114621695 | SLC1D2B   | ain family rain-coding, th protein G00000167202                   |
| 9945      | 0,007748649 | 0,0080009  | 0,15014976  | 0,9502417 | 7,897689539 | 6,947447843 | 0,155447 | 0,301721719  | 0,014891371 | 0,580898916  | GFPT2     | ;-6-phosphain-coding, th protein G00000131459                     |
| 2786      | 0,008693566 | 0,00804339 | 0,150491141 | -0,673965 | 6,07953735  | 6,75350255  | 0,559452 | -0,147714675 | 0,209383067 | -0,128902872 | GNG4      | n subunit gain-coding, th protein G00000168243                    |
| 401491    | 0,001024984 | 0,00808594 | 0,150831502 | 0,784615  | 6,899812716 | 6,11519773  | 0,055171 | 0,49888808   | 0,06616256  | 0,412255744  | VLDLR-AS1 | antisense n-coding Rlong non-cG00000236404                        |
| 55166     | 0,011462199 | 0,00810039 | 0,150873859 | -0,530245 | 7,417186015 | 7,947431375 | 0,332499 | -0,382027356 | 0,571581528 | -0,081516274 | CENPO     | omere protain-coding, th protein G00000031691                     |
| 1021      | 0,009548159 | 0,00813081 | 0,150986388 | -0,578251 | 8,93227264  | 9,510521375 | 0,033921 | -0,385998359 | 0,263126261 | 0,139051464  | CDK6      | ependent lain-coding, th protein G00000105810                     |
| 100133190 | 0,00428594  | 0,00820192 | 0,151398886 | 0,6006858 | 6,550638445 | 5,949997651 | 0,828321 | -0,064223889 | 0,046150832 | 0,297288513  | ADIRF-AS1 | antisense n-coding Rlong non-cG00000272734                        |
| 51026     | 0,00672381  | 0,00821479 | 0,151185823 | 0,6467256 | 9,628838802 | 8,981658223 | 0,088736 | 0,268826646  | 0,027226954 | 0,459467659  | GOLT1B    | ji transporin-coding, th protein G00000111711                     |
| 63932     | 0,004187131 | 0,00822571 | 0,151162198 | 1,284824  | 8,405667701 | 7,12084367  | 0,070505 | 0,659846807  | 0,228794323 | 0,2902718    | Cxorf56   | X open reain-coding, th protein G000000118610                     |
| 2012      | 0,009947297 | 0,00826511 | 0,151436856 | -0,879361 | 9,223099179 | 10,10246009 | 0,162741 | -0,4523104   | 0,121008647 | -0,243328061 | EMP1      | membranein-coding, th protein G00000134531                        |
| 221264    | 0,009563528 | 0,00828763 | 0,151178509 | -1,108745 | 3,622097152 | 4,73084226  | 0,163308 | -0,561835157 | 0,856029606 | -0,04904188  | AK9       | nylate kinasein-coding, th protein G00000155085                   |



|           |             |            |             |                  |             |              |          |               |             |              |               |                                                  |
|-----------|-------------|------------|-------------|------------------|-------------|--------------|----------|---------------|-------------|--------------|---------------|--------------------------------------------------|
| 729220    | 0,004678147 | 0,00834084 | 0,151702349 | <b>0,744995</b>  | 5,335368635 | 4,590373586  | 0,004228 | 0,253457532   | 0,023935265 | 0,587482082  |               |                                                  |
| 3327      | 0,001181909 | 0,00834188 | 0,151498755 | <b>0,6903516</b> | 10,63490131 | 9,944549693  | 0,1276   | 0,327406091   | 0,226181561 | 0,232942107  | DNAJB1        | tein family ÷in-coding ,th protein G00000132002  |
| 84450     | 0,008605607 | 0,0083494  | 0,151413331 | <b>-0,712783</b> | 6,588250037 | 7,301033203  | 0,11165  | -0,806682906  | 0,343500031 | -0,149496935 | ZNF512        | nger prote ÷in-coding ,th protein G00000243943   |
| 3484      | 0,001549225 | 0,00834952 | 0,151194207 | <b>2,025348</b>  | 10,14225907 | 8,116911051  | 0,00342  | 1,05760526    | 0,287181074 | 0,307936691  | IGFBP1        | th factor ÷in-coding ,th protein G00000146678    |
| 1723      | 0,004042607 | 0,00835743 | 0,15111648  | <b>0,657251</b>  | 7,120501613 | 6,463250647  | 0,049895 | -0,293245047  | 0,024416614 | 0,416582526  | DHODH         | dehydrogen ÷in-coding ,th protein G00000102967   |
| 93273     | 0,009865221 | 0,00839578 | 0,151147886 | <b>1,0589967</b> | 4,968606653 | 3,909609973  | 0,474504 | 0,343815719   | 0,184203018 | 0,542597934  | LEM1          | main contain ÷in-coding ,th protein G00000186007 |
| 348094    | 0,011632711 | 0,00841342 | 0,150807973 | <b>0,8265209</b> | 5,384987464 | 4,558466575  | 0,311003 | 0,210278157   | 0,108584106 | 0,374574067  | ANKDD1A1      | death dor ÷in-coding ,th protein G00000166839    |
| 285987    | 0,011801786 | 0,00842824 | 0,150420474 | <b>-2,188097</b> | 0,324904283 | 2,513001471  | 0,885327 | -0,138587909  | 0,412777068 | -0,764766757 | DLX6-AS1      | antisense ln-coding Rlong non-cG00000231764      |
| 112858    | 0,009304981 | 0,00850256 | 0,151310899 | <b>0,8028127</b> | 6,647773067 | 5,844960385  | 0,975839 | 0,01155649    | 0,109756142 | 0,421619151  | TP53RK        | regulating ÷in-coding ,th protein G00000172315   |
| 387720    | 0,01194929  | 0,00854891 | 0,151050662 | <b>0,9352746</b> | 4,764856695 | 3,829582048  | 0,19783  | 0,67359322    | 0,361805509 | 0,16664485   |               |                                                  |
| 154807    | 0,011570409 | 0,00856055 | 0,150825906 | <b>0,5832255</b> | 9,940974418 | 9,357748947  | 0,013197 | 0,325829637   | 0,008953045 | 0,586709946  | VKORC1L1      | luctase cor ÷in-coding ,th protein G00000196715  |
| 389493    | 0,008908679 | 0,00856664 | 0,150714567 | <b>0,6113714</b> | 8,052691287 | 7,441319886  | 0,804463 | -0,111256711  | 0,860657164 | 0,040082675  | NUPR2         | 2, transcri ÷in-coding ,th protein G00000185299  |
| 150483    | 0,008812141 | 0,00857734 | 0,150479615 | <b>0,5398664</b> | 6,61982676  | 6,079960324  | 0,059546 | 0,458341543   | 0,649377    | -0,060452299 | TEKT4         | tektin 4 ÷in-coding ,th protein G00000163060     |
| 51013     | 0,009160276 | 0,00860259 | 0,150709087 | <b>0,703689</b>  | 10,97984456 | 10,27615552  | 0,118    | 0,275750787   | 0,656243259 | -0,06490695  | EXOSC1        | me compos ÷in-coding ,th protein G00000171311    |
| 445815    | 0,01083679  | 0,00862634 | 0,150698664 | <b>0,500674</b>  | 6,844077191 | 6,343403167  | 0,043375 | 0,690217688   | 0,342310054 | -0,119165243 | ALM2-AKARKAP2 | reac other eadthroug G00000157654                |
| 6167      | 0,006850331 | 0,00863296 | 0,15060219  | <b>-0,531621</b> | 10,24638654 | 10,778007869 | 0,026306 | -0,21731447   | 0,003606362 | -0,401857114 | RPL37         | mal prote ÷in-coding ,th protein G00000145592    |
| 1002      | 0,007302277 | 0,00864046 | 0,150521017 | <b>1,036826</b>  | 7,629135557 | 6,592309602  | 0,050015 | 0,611262235   | 0,115898291 | 0,390985976  | CDH4          | cadherin 4 ÷in-coding ,th protein G00000179242   |
| 55296     | 0,00179054  | 0,0086457  | 0,150189735 | <b>-0,619196</b> | 5,76437358  | 6,38356989   | 0,110135 | -0,428832255  | 0,130974879 | -0,398228634 | TBC1D19       | ain family ÷in-coding ,th protein G00000109680   |
| 348303    | 0,008987895 | 0,00865036 | 0,150060254 | <b>2,7026123</b> | 3,270928847 | 0,56831658   | 0,763367 | 0,28685169    | 0,073484982 | 2,515337073  | SELENOV       | selenoprotein V(SELENOV)                         |
| 9263      | 0,011110242 | 0,00865643 | 0,149955545 | <b>0,6249478</b> | 8,88678182  | 8,261834053  | 0,0139   | 0,181469752   | 0,182107617 | 0,155920736  | STK17A        | reonine ki ÷in-coding ,th protein G00000164543   |
| 6372      | 0,001384361 | 0,00866319 | 0,149863037 | <b>0,7323497</b> | 4,192390525 | 3,460040867  | 0,386161 | 0,40946501    | 0,559772801 | 0,254772907  | CXCL6         | if chemoki ÷in-coding ,th protein G00000124875   |
| 51141     | 0,006090857 | 0,00867535 | 0,149864034 | <b>-0,509144</b> | 9,828276569 | 10,33742042  | 0,941665 | 0,007128283   | 0,014000107 | -0,294935994 | INSIG2        | induced ga ÷in-coding ,th protein G00000125629   |
| 642311    | 0,002541382 | 0,00870553 | 0,150175927 | <b>0,5168915</b> | 11,15648354 | 10,63959202  | 0,044431 | 0,302321385   | 0,001733056 | 0,213317988  | BMS1P15       | genesis fa ÷seudogen ÷udogen G00000258780        |
| 56919     | 0,004558334 | 0,00870665 | 0,149986388 | <b>0,686201</b>  | 8,324628083 | 7,638427075  | 0,863148 | 0,0205823     | 0,099277436 | 0,278195484  | DHX33         | l-box helice ÷in-coding ,th protein G00000005100 |
| 1193      | 0,011711373 | 0,00871601 | 0,149731074 | <b>-0,915146</b> | 4,150699838 | 5,071244499  | 0,286656 | -0,604394046  | 0,199793936 | -0,3966902   | CLIC2         | tracellular ÷in-coding ,th protein G0000015962   |
| 28989     | 0,005819849 | 0,00873167 | 0,1497924   | <b>0,591377</b>  | 10,39077414 | 9,799397175  | 0,287083 | 0,13046698    | 0,0248282   | 0,4100052    | NTMT1         | o-Lys N-mein-coding ,th protein G00000148335     |
| 163       | 0,004091902 | 0,00879123 | 0,150397468 | <b>-0,934281</b> | 9,693934218 | 10,62821567  | 0,045682 | -0,479225212  | 0,217546125 | -0,220617459 | AP2B1         | tein comp ÷in-coding ,th protein G00000006125    |
| 119559    | 0,008510503 | 0,00882021 | 0,15047772  | <b>0,6651577</b> | 8,873166473 | 8,208008786  | 0,126068 | 0,233518989   | 0,114337743 | 0,257479274  | SFXN4         | ideroflexin ÷in-coding ,th protein G00000183605  |
| 58476     | 0,007227844 | 0,00882787 | 0,150401125 | <b>0,6813437</b> | 8,847097381 | 8,165753695  | 0,046904 | 0,631817989   | 0,360061664 | 0,147872141  | TP53INP2      | 3 inducible ÷in-coding ,th protein G00000078804  |
| 8817      | 0,010514161 | 0,00883924 | 0,150181751 | <b>1,0467487</b> | 5,843961836 | 4,797213135  | 0,075823 | 0,474433293   | 0,091171204 | 0,502811617  | FGF18         | st growth ÷in-coding ,th protein G00000156427    |
| 55314     | 0,010677649 | 0,0088393  | 0,149977079 | <b>-0,739689</b> | 5,84656453  | 6,586253719  | 0,15718  | -0,419500293  | 0,039441181 | -0,469033206 | TMEM144       | mbrane pre ÷in-coding ,th protein G00000164124   |
| 64792     | 0,006322053 | 0,00888134 | 0,150278592 | <b>0,5006513</b> | 8,828168618 | 8,327517276  | 0,025161 | 0,287689891   | 0,983559462 | -0,002128855 | IFT22         | gellar tran ÷in-coding ,th protein G00000128581  |
| 7416      | 0,00398915  | 0,00892756 | 0,150444094 | <b>-0,553907</b> | 11,77262569 | 12,32617251  | 0,121143 | -0,347026239  | 0,470152495 | -0,077747368 | VDAC1         | ndent ane ÷in-coding ,th protein G00000213585    |
| 3140      | 0,00510052  | 0,00893286 | 0,150328838 | <b>-0,791041</b> | 6,592830183 | 7,383871537  | 0,327206 | 0,134535747   | 0,010313007 | -0,682006529 | MR1           | ibility com ÷in-coding ,th protein G00000153029  |
| 284632    | 0,001079441 | 0,00895182 | 0,150036328 | <b>3,098813</b>  | 3,09881303  | 0            | 0,046717 | 2,63372147    | 0,422649731 | 0,616410896  |               |                                                  |
| 3482      | 0,012392169 | 0,00896617 | 0,149871303 | <b>-0,632002</b> | 8,988477325 | 9,620479221  | 0,029453 | -0,426811843  | 0,799417512 | -0,034275821 | IGF2R         | rowth facte ÷in-coding ,th protein G00000197081  |
| 79628     | 0,011316967 | 0,00897818 | 0,14986981  | <b>-0,670819</b> | 6,199581943 | 6,870400936  | 0,029606 | -0,293040464  | 0,199155053 | -0,161323531 | SH3TC2        | tetratricop ÷in-coding ,th protein G00000169247  |
| 148930    | 0,010049615 | 0,00898472 | 0,149777112 | <b>0,6436623</b> | 5,768036574 | 5,124374316  | 0,068203 | 0,66653706    | 0,507286825 | 0,089775764  | KNCN          | kinocilin ÷in-coding ,th protein G00000162456    |
| 57761     | 0,012211887 | 0,0090216  | 0,149988155 | <b>0,8846791</b> | 9,122109471 | 8,237430363  | 0,008132 | 0,63210085    | 0,131162751 | 0,290507755  | TRIB3         | s pseudoki ÷in-coding ,th protein G00000101255   |
| 5796      | 0,010906232 | 0,00905142 | 0,150080976 | <b>-0,813367</b> | 8,193253195 | 9,00662052   | 0,113009 | -0,404498337  | 0,228326504 | -0,210890981 | PTPRK         | hosphatas ÷in-coding ,th protein G00000152894    |
| 3073      | 0,007897933 | 0,00905267 | 0,14990104  | <b>-0,761981</b> | 9,333153392 | 10,09513449  | 0,069937 | -0,379783031  | 0,199294494 | -0,219620357 | HEXA          | nidase sub ÷in-coding ,th protein G00000213614   |
| 10255     | 0,004639711 | 0,00908204 | 0,15018662  | <b>0,7168715</b> | 6,444227789 | 5,72735626   | 0,109529 | 0,439805803   | 0,981808215 | -0,001329662 | HCG9          | oup 9 (nonn-coding Rlong non-cG00000204625       |
| 119395    | 0,00240464  | 0,00911289 | 0,149896272 | <b>-0,568562</b> | 9,342895617 | 9,911457262  | 0,517899 | -0,196204999  | 0,370127928 | -0,279959456 | CALHM3        | neostasis ÷in-coding ,th protein G00000183128    |
| 4494      | 0,002332429 | 0,00913931 | 0,150131448 | <b>-1,684571</b> | 8,522713028 | 10,20728434  | 0,082188 | -0,932308347  | 0,755027595 | -0,100075146 | MT1F          | allothione ÷in-coding ,th protein G00000198417   |
| 390439    | 0,001122998 | 0,00914181 | 0,149973594 | <b>2,8466812</b> | 2,846681237 | 0            | 0,42265  | 1,487741181   | 0           | 0            | OR11G2        | imily 11 sub ÷in-coding ,th protein G00000196832 |
| 221710    | 0,003564931 | 0,00918289 | 0,150448296 | <b>0,8989355</b> | 9,466404625 | 8,56746909   | 0,865317 | 0,052881023   | 0,765975306 | -0,038299079 | SMIM13        | il membrar ÷in-coding ,th protein G00000224531   |
| 100652762 | 0,008461317 | 0,00921544 | 0,150583209 | <b>-1,611041</b> | 7,675654257 | 9,286694869  | 0,035095 | -0,840313838  | 0,086902616 | -0,588148028 |               |                                                  |
| 79947     | 0,011599331 | 0,00921652 | 0,150402372 | <b>0,6082675</b> | 8,497480495 | 7,889213027  | 0,454927 | 0,147218054   | 0,269102381 | 0,167887746  | DHDS          | iphosphate ÷in-coding ,th protein G00000117682   |
| 51676     | 0,002963847 | 0,00923063 | 0,150039662 | <b>-1,137747</b> | 6,709467341 | 7,847214169  | 0,963889 | 0,009219794   | 0,067792026 | -0,345681246 | ASB2          | and SOCS ÷in-coding ,th protein G00000106628     |
| 58515     | 0,011120281 | 0,00933544 | 0,150754062 | <b>0,6093743</b> | 12,86757384 | 12,25819949  | 0,127636 | 0,468149239   | 0,135976159 | 0,225326643  | SELENOK       | selenoprotein K(SELENOK)                         |
| 283554    | 0,012403228 | 0,00933748 | 0,150590724 | <b>-1,840433</b> | 2,816181526 | 4,656614649  | 0,123464 | -0,2029484651 | 0,062294428 | 0,944653492  | GPR137C       | oupled rec ÷in-coding ,th protein G00000180998   |
| 88745     | 0,00353299  | 0,00934002 | 0,150435777 | <b>0,8026664</b> | 11,61268115 | 10,81001473  | 0,141841 | 0,200346881   | 0,024903354 | 0,487526464  | RRP36         | il RNA pro ÷in-coding ,th protein G00000124541   |
| 377677    | 0,002560385 | 0,00934416 | 0,150307032 | <b>-0,700637</b> | 7,018691065 | 7,719327824  | 0,001546 | -0,48552906   | 0,181172536 | 0,165950701  | CA13          | nic anhydr ÷in-coding ,th protein G00000185015   |
| 127495    | 0,002878865 | 0,0093487  | 0,150184989 | <b>-1,899232</b> | 1,351016182 | 3,250248289  | 0,917923 | 0,068652584   | 0,031259771 | -1,073969619 | LRRC39        | repeat co ÷in-coding ,th protein G00000122477    |
| 2249      | 0,007833042 | 0,00937612 | 0,150430371 | <b>0,7185767</b> | 4,711947359 | 3,993700662  | 0,552181 | 0,175570985   | 0,411887886 | 0,17414101   | ALDOB         | lctose-bisph ÷in-coding ,th protein G00000136872 |
| 23503     | 0,006718787 | 0,00939808 | 0,150587574 | <b>-0,504808</b> | 6,694014937 | 7,198822551  | 0,0627   | -0,374046428  | 0,680770434 | -0,039540801 | ZFYV26        | YVE-type ce ÷in-coding ,th protein G00000072121  |
| 56479     | 0,002251487 | 0,00942098 | 0,150565094 | <b>0,6245181</b> | 7,824027145 | 7,199509013  | 0,059646 | 0,344672635   | 0,329494819 | 0,13112356   | KCNQ5         | sd channel ÷in-coding ,th protein G00000185760   |
| 284422    | 0,013005036 | 0,00942848 | 0,150490762 | <b>0,5068473</b> | 6,094597896 | 5,587750599  | 0,011673 | 0,626515063   | 0,409964186 | -0,122291148 | SMIM24        | il membrar ÷in-coding ,th protein G00000095932   |
| 10002     | 0,012878043 | 0,00944172 | 0,150508024 | <b>0,5178621</b> | 4,900622285 | 4,382760151  | 0,250915 | 0,365441573   | 0,384405006 | 0,097890914  | NR2E3         | ubfamily 2 ÷in-coding ,th protein G00000278570   |

|           |             |            |             |                  |              |             |          |              |             |              |                 |                                                 |
|-----------|-------------|------------|-------------|------------------|--------------|-------------|----------|--------------|-------------|--------------|-----------------|-------------------------------------------------|
| 3113      | 0,00159057  | 0,00947228 | 0,150607602 | <b>-0,962089</b> | 9,800962878  | 10,77115212 | 0,253523 | -0,071054052 | 0,008664856 | -0,787752696 | HLA-DPA1        | ility complein-coding.th protein G00000231389   |
| 121053    | 0,011808107 | 0,00951505 | 0,150707126 | <b>0,7071294</b> | 10,29950118  | 9,592371822 | 0,036652 | 0,245609754  | 0,081507037 | 0,334197223  | C12orf45        | l2 open reain-coding.th protein G00000151131    |
| 29087     | 0,001533326 | 0,00955812 | 0,151195963 | <b>0,5371988</b> | 9,266126231  | 8,728927457 | 0,282162 | -0,070060885 | 0,447271526 | -0,062701618 | THYN1           | te nuclear ain-coding.th protein G00000151500   |
| 100507436 | 0,009267306 | 0,00958782 | 0,151472352 | <b>0,6547563</b> | 12,39786015  | 11,74310389 | 0,018303 | 0,315478009  | 0,118024211 | 0,167690703  | MICA            | peptide-reain-coding.th protein G00000204520    |
| 65258     | 0,006699404 | 0,00962553 | 0,151681171 | <b>0,5958096</b> | 5,968279711  | 5,372470081 | 0,043033 | 0,270627399  | 0,08912688  | -0,001402278 | MPPE1           | phosphoesain-coding.th protein G00000154889     |
| 79714     | 0,012683692 | 0,00967145 | 0,151441446 | <b>0,6305092</b> | 7,259633603  | 6,62912441  | 0,526068 | -0,105153497 | 0,07972953  | 0,320612314  | CCDC51          | domain coain-coding.th protein G00000164051     |
| 9792      | 0,013146111 | 0,00977586 | 0,152306257 | <b>0,5712314</b> | 10,16443191  | 9,593200512 | 0,030601 | 0,326858456  | 0,67040281  | 0,04781777   | SERTAD2         | omain conin-coding.th protein G00000179833      |
| 27324     | 0,011941304 | 0,00980674 | 0,152403932 | <b>1,4422962</b> | 4,559430873  | 3,117134713 | 0,024482 | 1,382545589  | 0,676177943 | -0,148168581 | TOX3            | 'group boxin-coding.th protein G00000103460     |
| 10419     | 0,002622854 | 0,00984919 | 0,152680379 | <b>0,6395111</b> | 9,717478724  | 9,077967619 | 0,319654 | 0,125085742  | 0,162026142 | 0,163500474  | PRMT5           | ine methylain-coding.th protein G00000100462    |
| 80017     | 0,002350858 | 0,00992743 | 0,152936274 | <b>-0,716542</b> | 6,7422230811 | 7,458772855 | 0,001512 | -0,291410029 | 0,001304013 | -0,297447971 | C14orf1594      | open reain-coding.th protein G00000133943       |
| 4358      | 0,009950884 | 0,00993965 | 0,152934244 | <b>-0,60651</b>  | 8,556211874  | 9,162722274 | 0,116038 | -0,456491597 | 0,291213147 | -0,168113495 | MPV17           | rial inner ein-coding.th protein G00000115204   |
| 55762     | 0,013568426 | 0,00998786 | 0,152916308 | <b>-0,886904</b> | 7,340196866  | 8,227100404 | 0,328973 | -0,752621401 | 0,236506363 | -0,502376285 | ZNF701          | nger proteain-coding.th protein G00000167562    |
| 4893      | 0,003627394 | 0,00999522 | 0,152840014 | <b>-0,567675</b> | 9,442371994  | 10,01004732 | 0,000877 | -0,600802883 | 0,154311952 | 0,162783454  | NRAS            | AS viral onain-coding.th protein G00000213281   |
| 83861     | 0,011789421 | 0,01006206 | 0,153106005 | <b>-0,784595</b> | 6,090114387  | 6,874709309 | 0,28523  | -0,136769693 | 0,050063691 | -0,45927165  | RSPH3           | spoke 3 hoain-codign.th protein G00000130363    |
| 134548    | 0,012015065 | 0,01006849 | 0,153015835 | <b>0,7159698</b> | 6,651587322  | 5,935617557 | 0,122902 | 0,382965322  | 0,495104339 | 0,105318008  | SOWAHA          | repeat domain-coding.th protein G00000198944    |
| 55035     | 0,010843892 | 0,01007604 | 0,152942897 | <b>0,5300386</b> | 8,9339065    | 8,403867859 | 0,915732 | 0,021659967  | 0,185594232 | 0,172725256  | NOL8            | eolar protein-coding.th protein G00000198000    |
| 81894     | 0,013407388 | 0,01011283 | 0,153313471 | <b>0,5813251</b> | 7,973311662  | 7,391986595 | 0,203836 | 0,235634063  | 0,028100296 | 0,366666221  | SLC25A28        | r family 25ain-coding.th protein G00000155287   |
| 23223     | 0,012021417 | 0,0102259  | 0,154649045 | <b>0,5984214</b> | 7,952045437  | 7,353624038 | 0,428785 | 0,16730971   | 0,462426057 | 0,131671611  | RRP12           | A processinain-coding.th protein G00000052749   |
| 10939     | 0,002798754 | 0,01030244 | 0,154861162 | <b>-0,537841</b> | 8,616494141  | 9,154334885 | 0,096072 | -0,31414414  | 0,433789792 | 0,104543905  | AFG3L2          | x AAA peptin-coding.th protein G00000141385     |
| 3486      | 0,012104972 | 0,01034915 | 0,155186606 | <b>0,7705508</b> | 8,463142669  | 7,692591852 | 0,025925 | 0,60187054   | 0,724753545 | -0,062106333 | IGFBP3          | th factor bain-coding.th protein G00000146674   |
| 26227     | 0,007109191 | 0,01040164 | 0,155409315 | <b>1,0158204</b> | 5,707125088  | 4,691304681 | 0,155717 | 0,066137981  | 0,007841038 | 0,741539484  | PHGDH           | cerate dehin-coding.th protein G00000092621     |
| 3875      | 0,008602701 | 0,0104489  | 0,155927364 | <b>0,6180708</b> | 12,92919937  | 12,31112856 | 0,66213  | 0,083297317  | 0,252608159 | -0,213342272 | KRT18           | keratin 18ain-coding.th protein G00000111057    |
| 27238     | 0,006565546 | 0,01046394 | 0,155963894 | <b>0,5786153</b> | 9,577808353  | 8,99919306  | 0,030784 | 0,344010198  | 0,798687194 | 0,02714695   | GPLOW           | main and kein-coding.th protein G00000068394    |
| 4775      | 0,013409641 | 0,01048095 | 0,155842234 | <b>0,5257781</b> | 7,155042638  | 6,629264583 | 0,307158 | 0,178319553  | 0,243913757 | 0,166534235  | NFATC3          | or of activain-coding.th protein G00000072736   |
| 8291      | 0,010137635 | 0,01054191 | 0,156186285 | <b>-0,579053</b> | 6,969977803  | 7,549030727 | 0,948769 | 0,005510588  | 0,032173057 | -0,273660054 | DYSF            | dysferlin ain-coding.th protein G00000135636    |
| 23753     | 0,009316358 | 0,01057648 | 0,156324402 | <b>1,1756366</b> | 12,03772009  | 10,86208349 | 0,023535 | 0,677103599  | 0,099498956 | 0,508781514  | SDF2L1          | derived faain-coding.th protein G00000128228    |
| 9764      | 0,008801532 | 0,01061482 | 0,156331444 | <b>0,8533803</b> | 6,935711024  | 6,082330757 | 0,003221 | 0,575237512  | 0,54659438  | 0,103836235  | KIAA0513        | KIAA0513 ain-coding.th protein G00000135709     |
| 360205    | 0,010506008 | 0,01063339 | 0,156048292 | <b>-0,500331</b> | 6,631278361  | 7,131609428 | 0,599309 | 0,085987906  | 0,007808467 | -0,360311692 | PRAC2           | 'susceptibein-coding.th protein G00000229637    |
| 222223    | 0,010408256 | 0,01065644 | 0,156201528 | <b>-0,910526</b> | 5,046303095  | 4,929030395 | 0,968934 | -0,010458878 | 0,01162444  | -0,72320041  | KIAA1324LAA1324 | likein-coding.th protein G00000164659           |
| 55068     | 0,009934967 | 0,01068623 | 0,156268244 | <b>0,5733862</b> | 4,502468902  | 4,920282732 | 0,080041 | -0,350754098 | 0,011867923 | 0,570279436  | ENOX1           | ulfide-thioain-coding.th protein G00000120658   |
| 10687     | 0,009177841 | 0,01069563 | 0,156221325 | <b>-0,954545</b> | 6,143679436  | 7,098224711 | 0,036015 | -0,797035075 | 0,21938854  | 0,173505053  | PNMA2           | lastic Ma ain-coding.th protein G00000240694    |
| 25874     | 0,012722912 | 0,0107236  | 0,156077718 | <b>0,5289416</b> | 11,87651204  | 11,34757044 | 0,056634 | 0,343968007  | 0,343775369 | -0,145374494 | MPC2            | rial pyruvain-coding.th protein G00000141318    |
| 414328    | 0,013598395 | 0,01074001 | 0,15595005  | <b>-0,554815</b> | 7,663214379  | 8,218029162 | 0,465349 | -0,139322703 | 0,019031585 | -0,424334928 | IDNK            | , gluconokinain-coding.th protein G00000148051  |
| 348645    | 0,013816228 | 0,01074564 | 0,155849028 | <b>1,1059257</b> | 4,759091371  | 3,653165649 | 0,611751 | 0,248043035  | 0,862864539 | 0,07565259   | C22orf34        | l2 open re: other unknown G00000188511          |
| 65977     | 0,01316446  | 0,01075757 | 0,155839527 | <b>0,7122439</b> | 9,858045237  | 9,145801343 | 0,060282 | 0,332666942  | 0,239776006 | 0,206499148  | PLEKHA3         | logy domaain-coding.th protein G00000116095     |
| 5271      | 0,01300658  | 0,01080965 | 0,156228551 | <b>0,7010169</b> | 8,545670865  | 7,844654    | 0,318439 | 0,333813625  | 0,315811755 | 0,228370801  | SERPINB8        | amily B meain-coding.th protein G00000166401    |
| 645460    | 0,008951939 | 0,01086743 | 0,156880543 | <b>-0,724923</b> | 8,934938587  | 9,659861684 | 0,304337 | -0,305406319 | 0,736600158 | 0,05649163   |                 |                                                 |
| 2308      | 0,014608642 | 0,01088361 | 0,15674875  | <b>0,7811364</b> | 7,9535506    | 7,172414228 | 0,135645 | 0,317231216  | 0,118457273 | 0,307646903  | FOXO1           | khead box ain-coding.th protein G00000150907    |
| 1846      | 0,007556123 | 0,01088497 | 0,15658636  | <b>0,5686577</b> | 9,099307857  | 8,530650136 | 0,240967 | 0,198275168  | 0,158778241 | -0,192827633 | DUSP4           | ificity phosain-coding.th protein G00000120875  |
| 4504      | 0,003729232 | 0,01093976 | 0,157009802 | <b>-1,369133</b> | 10,24874054  | 11,61787351 | 0,998809 | -0,724881032 | 0,003995122 | -0,55894594  | MT3             | tallothionein-coding.th protein G00000082750    |
| 353144    | 0,013045189 | 0,01099434 | 0,157428233 | <b>0,906893</b>  | 4,320374117  | 3,413481096 | 0,563695 | 0,507575168  | 0,983119736 | 0,014221923  | LCE3C           | nified enveain-coding.th protein G00000244057   |
| 8460      | 0,007585644 | 0,01100365 | 0,157198132 | <b>0,5016816</b> | 9,139393975  | 8,637658206 | 0,019081 | 0,49288989   | 0,078641255 | 0,265774849  | TPST1           | ein sulfotrain-coding.th protein G00000169902   |
| 144165    | 0,010686627 | 0,01105989 | 0,157637927 | <b>-0,848593</b> | 6,866562135  | 7,715155526 | 0,407322 | -0,17399403  | 0,065412313 | -0,523734389 | PRICKLE1        | ir cell polarein-coding.th protein G00000139174 |
| 10785     | 0,013992728 | 0,01106328 | 0,157505016 | <b>0,5859607</b> | 7,766847189  | 7,180886509 | 0,361771 | 0,129502889  | 0,571845184 | -0,084059289 | WDR4            | repeat domain-coding.th protein G00000160193    |
| 5094      | 0,01394172  | 0,01109849 | 0,157824902 | <b>-0,62997</b>  | 11,70392151  | 12,33389158 | 0,165838 | -0,232946489 | 0,481281273 | -0,112360801 | PCBP2           | ) binding peain-coding.th protein G00000197111  |
| 10953     | 0,009610902 | 0,01110727 | 0,157768608 | <b>-0,69835</b>  | 8,802379372  | 9,500728969 | 0,080892 | -0,525199649 | 0,261413631 | 0,106916149  | TOMM34          | r mitochondrain-coding.th protein G00000025772  |
| 2519      | 0,00344717  | 0,01112629 | 0,157857717 | <b>-1,36804</b>  | 8,925332768  | 10,29337269 | 0,047058 | -0,415328351 | 0,069478847 | 0,19995521   | FUCA2           | e, alpha-L ain-coding.th protein G0000001036    |
| 164592    | 0,005056455 | 0,01115699 | 0,15775113  | <b>1,0133939</b> | 5,188613929  | 4,175220031 | 0,000476 | 1,215520002  | 0,850868222 | 0,033792219  | CCDC116         | omain corain-coding.th protein G00000161180     |
| 283911    | 0,013977834 | 0,01118786 | 0,157827306 | <b>1,9909152</b> | 3,843116389  | 1,85210123  | 0,77947  | -0,242610961 | 0,217804996 | 1,291005922  |                 |                                                 |
| 3624      | 0,005445681 | 0,01127726 | 0,158187634 | <b>0,6511792</b> | 6,32935497   | 5,678175759 | 0,190691 | 0,447698652  | 0,656655005 | -0,12736126  | INHBA           | n beta A slain-coding.th protein G00000122641   |
| 84293     | 0,006048812 | 0,01128529 | 0,158121203 | <b>-0,996616</b> | 9,122525869  | 10,11914184 | 0,06725  | -0,299942592 | 0,227161983 | -0,114406798 | FAM213A         | n ce similarain-coding.th protein G00000122378  |
| 100129069 | 0,002041097 | 0,01129548 | 0,157906728 | <b>0,5825042</b> | 7,190669223  | 6,608165019 | 0,276104 | 0,231367696  | 0,117906157 | 0,316846255  |                 |                                                 |
| 171391    | 0,004935836 | 0,01130525 | 0,157687372 | <b>-0,830639</b> | 5,238264465  | 6,068903107 | 0,227979 | -0,718600731 | 0,055584667 | 0,159140106  |                 |                                                 |
| 6856      | 0,009053568 | 0,01134106 | 0,157831436 | <b>0,6566305</b> | 11,00680104  | 10,35017051 | 0,093697 | 0,417702185  | 0,077525312 | 0,346230122  | SYPL1           | ptophysin lain-coding.th protein G00000008282   |
| 554251    | 0,006482928 | 0,01136791 | 0,158027471 | <b>-1,221164</b> | 5,666676587  | 6,887840256 | 0,009498 | -0,796497589 | 0,042871477 | 0,348960349  | FBXO48          | ox proteinain-coding.th protein G00000204923    |
| 3606      | 0,009843793 | 0,01136811 | 0,157853056 | <b>-1,170071</b> | 6,84808188   | 8,018152698 | 0,06964  | -0,867652209 | 0,059125525 | -0,390379006 | IL18            | terleukin lain-coding.th protein G00000150782   |
| 23157     | 0,011612965 | 0,01137877 | 0,157824204 | <b>-0,522886</b> | 7,307100919  | 7,829986566 | 0,203626 | -0,363395837 | 0,111215882 | -0,259259481 | SEPT6           | r septin 6 ain-coding.th protein G00000125354   |
| 11345     | 0,010519692 | 0,01146718 | 0,158164813 | <b>-1,309256</b> | 9,416227283  | 10,72548374 | 0,016608 | -0,857892899 | 0,596890628 | -0,123551499 | ABARAPL         | gto, associain-coding.th protein G000000034713  |
| 55529     | 0,01495706  | 0,01147313 | 0,158070961 | <b>0,5381672</b> | 9,53438817   | 8,996220923 | 0,012222 | 0,285970662  | 0,373967976 | -0,097182159 | TMEM55A         | nbrane preain-coding.th protein G00000155099    |

|           |             |            |             |            |             |              |          |              |             |              |              |                                                 |
|-----------|-------------|------------|-------------|------------|-------------|--------------|----------|--------------|-------------|--------------|--------------|-------------------------------------------------|
| 80146     | 0,00753796  | 0,01149451 | 0,157838748 | -0,976146  | 8,549951851 | 9,526098249  | 0,008737 | -0,511303549 | 0,406049047 | -0,162968868 | UXS1         | onate decasin-coding.th protein G00000115652    |
| 118812    | 0,012115851 | 0,0114961  | 0,157685755 | 0,5914211  | 7,185004376 | 6,593583257  | 0,382851 | 0,122963098  | 0,233843621 | 0,1893228    | MORNA        | repeat contain-coding.th protein G00000171160   |
| 221079    | 0,013704338 | 0,01149974 | 0,157561162 | -0,6390777 | 7,547526632 | 8,186603733  | 0,056076 | -0,66391087  | 0,842328959 | -0,021222417 | ARL5B        | ion factor la-in-coding.th protein G00000165997 |
| 286480    | 0,004863925 | 0,01150657 | 0,157480597 | 1,1954476  | 11,72531681 | 10,525986291 | 0,026449 | 0,693336181  | 0,406364527 | -0,213591491 | UBE2E4P      | ng enzymesseudogenseudogene                     |
| 284865    | 0,012858428 | 0,01150761 | 0,157320997 | 2,0007859  | 2,251297787 | 0,250511894  | 0,497808 | 0,791975157  | 0,114899091 | 0,82608913   |              |                                                 |
| 3137      | 0,010663107 | 0,01150766 | 0,157148266 | -0,751481  | 14,19326573 | 14,94474675  | 0,227674 | -0,307067183 | 0,104937066 | -0,338127172 | HLA-J        | ly complexseudogenseudogenG00000204622          |
| 56990     | 0,005438129 | 0,01151756 | 0,157110116 | 0,9395942  | 8,974326551 | 8,034768385  | 0,051974 | 0,630600974  | 0,202918426 | 0,252908519  | CDC42SE21    | small effein-coding.th protein G00000158985     |
| 51251     | 0,014692969 | 0,01154543 | 0,15731712  | -0,61696   | 8,309023389 | 8,925983563  | 0,004866 | -0,554960135 | 0,580845795 | 0,075738901  | NT5C3A       | tidase, cytein-coding.th protein G0000012643    |
| 865       | 0,003663399 | 0,01157054 | 0,15748605  | -0,885897  | 7,919643202 | 8,805539844  | 0,067749 | -0,441955103 | 0,097254702 | 0,328978497  | CBFB         | ng factor bein-coding.th protein G00000067955   |
| 4232      | 0,002593292 | 0,01157624 | 0,157390574 | -0,869265  | 6,039913331 | 6,909178664  | 0,002503 | -0,795661101 | 0,072063463 | 0,361874173  | MEST         | m specific tein-coding.th protein G00000106484  |
| 7700      | 0,012362702 | 0,01160025 | 0,157199407 | -0,548696  | 6,931682304 | 7,480378698  | 0,023099 | -0,68382607  | 0,275196064 | 0,224624516  | ZNF141       | nger proteain-coding.th protein G00000131127    |
| 100129110 | 0,001842868 | 0,01160226 | 0,157054769 | -2,53007   | 2,864149713 | 5,394220184  | 0,000133 | -5,608084664 | 0,059494385 | 0,21386448   |              |                                                 |
| 125963    | 0,00994505  | 0,01161511 | 0,157057035 | 0,6215591  | 6,390150467 | 5,768591407  | 0,046109 | 0,848892782  | 0,792060015 | -0,060645598 | OR1M1        | amily 1 subin-coding.th protein G00000170929    |
| 100128942 | 0,015306397 | 0,01162592 | 0,15669005  | 0,7936601  | 6,058346494 | 5,264686417  | 0,047634 | 0,708815675  | 0,979346987 | -0,006388035 |              |                                                 |
| 728113    | 0,015389488 | 0,01165508 | 0,156912358 | -0,797666  | 7,066560769 | 7,864227123  | 0,360371 | -0,207403754 | 0,197746815 | -0,340473169 | ANXA8L1      | lexin A8-likein-coding.th protein G00000264230  |
| 65078     | 0,015485118 | 0,01165883 | 0,156622392 | 0,9020841  | 10,25879515 | 9,356787515  | 0,067564 | -0,014841615 | 0,357899028 | -0,179492815 | RTN4R        | ulon 4 recein-coding.th protein G0000004608     |
| 10456     | 0,015223436 | 0,01168654 | 0,156654838 | 0,5542033  | 11,46767979 | 10,91347651  | 0,118485 | 0,263595333  | 0,184106662 | 0,164393044  | HAX1         | sociated prein-coding.th protein G00000143575   |
| 285150    | 0,001567844 | 0,01169668 | 0,156621251 | 3,3113482  | 3,311348196 | 0            | 0,782933 | 0,427780647  | 0,186276581 | 1,759578356  |              |                                                 |
| 283464    | 0,007014161 | 0,01170969 | 0,15662607  | -0,994123  | 6,143054326 | 7,137177231  | 0,215667 | -0,519253377 | 0,554655997 | 0,153872929  | GXYLT1       | xylosyltrarin-coding.th protein G00000151233    |
| 386685    | 0,010824448 | 0,01174281 | 0,156561883 | 0,6025899  | 6,730813767 | 6,128223829  | 0,94896  | 0,010842569  | 0,101957279 | 0,312650857  | RTAP10-1     | ociated prein-coding.th protein G00000189169    |
| 63939     | 0,012120297 | 0,0118115  | 0,15629993  | -0,535671  | 7,271807212 | 7,80747803   | 0,19003  | -0,74353007  | 0,114545044 | -0,475172789 | FAM217B      | nce similarain-coding.th protein G00000196227   |
| 80256     | 0,01440338  | 0,01183692 | 0,156135859 | 0,5992348  | 6,614343436 | 6,014199514  | 0,138407 | 0,360281736  | 0,90063774  | 0,023799429  | FAM214B      | nce similarain-coding.th protein G0000005238    |
| 978       | 0,002001391 | 0,01185906 | 0,156261483 | -1,000974  | 11,24852202 | 12,2494963   | 0,011048 | -0,522560259 | 0,015973592 | -0,640452737 | CDA          | line deamin-coding.th protein G00000158825      |
| 90580     | 0,013268286 | 0,01186583 | 0,156018762 | 0,757611   | 7,83971514  | 7,082104091  | 0,864225 | 0,026290408  | 0,024373222 | 0,572557799  | C19orf52     | l9 open reain-coding.th protein G00000142444    |
| 124801    | 0,014119218 | 0,01186858 | 0,1558895   | 0,6260923  | 10,79223502 | 10,79223502  | 0,308096 | 0,150119853  | 0,164842269 | 0,230866415  | LSM12        | V12 homolain-coding.th protein G00000161654     |
| 55527     | 0,010234754 | 0,01186931 | 0,15573389  | 0,6106255  | 7,114166675 | 6,503541193  | 0,169962 | 0,145307049  | 0,101188119 | 0,167063689  | FEM1A        | -1 homolain-coding.th protein G00000141965      |
| 5049      | 0,008236383 | 0,01189345 | 0,155720697 | -1,305916  | 9,645016806 | 10,95093325  | 0,016187 | -0,905411486 | 0,897780276 | -0,036626657 | PAFAH1B2     | cetylhydrocin-coding.th protein G00000168092    |
| 84691     | 0,0134263   | 0,0119347  | 0,15609586  | 0,7806374  | 6,277699631 | 5,497062201  | 0,003187 | 0,819596822  | 0,774525741 | -0,049486588 | FAM71F1      | nce similarain-coding.th protein G00000135248   |
| 23642     | 0,010828643 | 0,01195582 | 0,155878183 | 0,8078164  | 9,932425835 | 9,124609447  | 0,234307 | 0,158224599  | 0,376275226 | 0,160973526  | SNHG1        | olar RNA rn-coding Rlong non-cG00000255717      |
| 7754      | 0,012635294 | 0,01196682 | 0,155857601 | -0,7919    | 6,462629392 | 7,254529808  | 0,634015 | -0,219640083 | 0,028245226 | -0,939563157 | ZNF204P      | rotein 204, pseudogenseudogenG00000204789       |
| 23408     | 0,008115685 | 0,01198597 | 0,15594297  | -0,901897  | 6,671734347 | 7,57363115   | 0,077061 | -0,339112063 | 0,944215439 | -0,006860998 | SIRT5        | sirtuin 5 ain-coding.th protein G00000124523    |
| 644246    | 0,013788125 | 0,01201601 | 0,155842791 | -1,100154  | 7,86490774  | 8,965062171  | 0,14131  | -0,377395323 | 0,079154821 | -0,42811782  | CANSL1-AS1   | antisensin-coding Rlong non-cG00000214401       |
| 11118     | 0,013027023 | 0,01204682 | 0,155753094 | -0,855423  | 6,45415404  | 7,309577372  | 0,226252 | -0,597930591 | 0,154031123 | -0,453547909 | BTN3A2       | subfamily ain-coding.th protein G00000186470    |
| 255626    | 0,015608197 | 0,01205249 | 0,155663864 | 2,214288   | 5,383015108 | 3,168727154  | 0,913706 | 0,065786996  | 0,086220515 | 1,281465967  | HIST1H2BAR 1 | H2B famin-coding.th protein G00000146047        |
| 26958     | 0,002296647 | 0,01206364 | 0,155645562 | -0,759909  | 7,639420343 | 8,399329529  | 0,045963 | -0,401219543 | 0,380826183 | -0,101872476 | COPG2        | 1 complex ain-coding.th protein G00000158623    |
| 51531     | 0,011656814 | 0,01207565 | 0,155638379 | -0,553933  | 6,913079954 | 7,467012506  | 0,217103 | -0,403073689 | 0,580432644 | 0,045854625  | TRMO         | ethyltransain-coding.th protein G00000136932    |
| 1901      | 0,014735115 | 0,01207776 | 0,155503757 | -0,837539  | 6,259021767 | 7,096560355  | 0,227601 | -0,418600166 | 0,883156755 | -0,025082775 | S1PR1        | 1-phosphain-coding.th protein G00000170989      |
| 51014     | 0,014962446 | 0,01208076 | 0,155380972 | 0,6300015  | 11,08501856 | 10,45501707  | 0,167836 | 0,191739379  | 0,050058272 | 0,330566644  | TMED7        | e p24 traffain-coding.th protein G00000134970   |
| 23215     | 0,005085213 | 0,01211303 | 0,155634396 | 0,6043204  | 10,8071396  | 10,20281917  | 0,001846 | 0,528312927  | 0,543246968 | 0,066611848  | PRRC2C       | rich coiledain-coding.th protein G00000117523   |
| 5092      | 0,01278192  | 0,01215882 | 0,155899206 | -0,691356  | 9,43830833  | 10,12966411  | 0,132877 | -0,47748461  | 0,877226823 | -0,015861637 | PCBD1        | rbinolamain-coding.th protein G00000166228      |
| 347902    | 0,006891156 | 0,01217299 | 0,155919505 | -0,717041  | 9,067996386 | 9,785037004  | 0,579865 | -0,131621619 | 0,14931985  | -0,426217103 | AMIGO2       | cule with lpin-coding.th protein G00000139211   |
| 349114    | 0,016184548 | 0,01221353 | 0,15611591  | -0,858436  | 10,61150081 | 11,46993669  | 0,002805 | -0,671094047 | 0,517603335 | 0,110909373  | LINC00265    | ion-protein-coding Rlong non-cG00000188185      |
| 90417     | 0,004393291 | 0,01222345 | 0,155920856 | 0,6355912  | 9,015546624 | 8,379955427  | 0,157772 | 0,206485408  | 0,051991913 | 0,356426237  | KNSTRN       | d astrin/SPain-coding.th protein G00000128944   |
| 1535      | 0,012327348 | 0,01228532 | 0,15606714  | -0,650121  | 11,47156915 | 12,1216902   | 0,144847 | -0,533553491 | 0,174999243 | -0,229731871 | CYBA         | ne b-245 alain-coding.th protein G00000051523   |
| 6041      | 0,00350478  | 0,01230139 | 0,156111208 | -2,094962  | 3,612211937 | 5,707173489  | 0,233472 | -1,373243991 | 0,586956871 | -0,067991394 | RNASEL       | bonucleasain-coding.th protein G00000135828     |
| 1317      | 0,012520984 | 0,0123474  | 0,156214976 | 0,6955281  | 8,521387733 | 7,825859654  | 0,388312 | 0,167524128  | 0,01944771  | 0,667209933  | SLC31A1      | er family 3ain-coding.th protein G00000136868   |
| 64837     | 0,00318666  | 0,01235731 | 0,156021618 | 0,945211   | 8,598426398 | 7,653215401  | 0,029754 | 0,27875435   | 0,004869783 | 0,345381628  | KLC2         | sin light chain-coding.th protein G00000174996  |
| 94121     | 0,007220727 | 0,01246031 | 0,156365672 | -0,590917  | 6,293070358 | 6,883987028  | 0,228862 | -0,414090606 | 0,29706222  | 0,144941384  | SYTL4        | totagmin ain-coding.th protein G00000102362     |
| 253558    | 0,005834948 | 0,01247482 | 0,156389291 | 0,8185131  | 8,692591991 | 7,874078921  | 0,153202 | 0,193435711  | 0,032934593 | 0,516727414  | LCLAT1       | lipin acyltrain-coding.th protein G00000172954  |
| 440766    | 0,014782142 | 0,01247791 | 0,156269869 | 0,5953421  | 6,718597216 | 6,123255096  | 0,621423 | 0,269444782  | 0,492555802 | 0,373831107  |              |                                                 |
| 685       | 0,015568905 | 0,01249747 | 0,156356701 | -0,758768  | 5,294002679 | 6,052770632  | 0,314695 | -0,86925969  | 0,387589104 | 0,159199454  | BTC          | betacellulirain-coding.th protein G00000174808  |
| 7594      | 0,016148143 | 0,01253029 | 0,156293792 | -0,902584  | 6,951229056 | 7,853813193  | 0,086561 | -0,758665949 | 0,395415438 | -0,16588094  | ZNF43        | inger proteain-coding.th protein G00000198521   |
| 100130889 | 0,01568718  | 0,01253252 | 0,156164277 | 0,8128296  | 7,544898142 | 6,732068532  | 0,153253 | 0,324587859  | 0,268916327 | 0,265855839  | PSORS1C31    | candidaten-coding Rlong non-cG00000204528       |
| 51540     | 0,006100639 | 0,01255896 | 0,156179487 | 0,6708222  | 7,889216487 | 7,218394328  | 0,111856 | 0,150941251  | 0,027252452 | 0,458295093  | SCLY         | ocysteine ain-coding.th protein G00000132330    |
| 127933    | 0,008278216 | 0,01256903 | 0,155991482 | -0,756802  | 7,948151358 | 8,704953319  | 0,028446 | -0,508568422 | 0,49572383  | 0,120900191  | UHMK1        | ology motain-coding.th protein G00000152332     |
| 388730    | 0,015451198 | 0,01260737 | 0,155998408 | 2,7059368  | 3,180063788 | 0,47412701   | 0,756229 | 0,3678838    | 0,091677292 | 2,487197612  | TMEM81       | mbrane prein-coding.th protein G00000174529     |
| 6624      | 0,006342657 | 0,01262033 | 0,156002866 | -1,605285  | 5,528738673 | 7,134023389  | 0,033502 | -0,992980824 | 0,166997113 | -0,277657381 | FSCN1        | in-bundlingin-coding.th protein G00000075618    |
| 375057    | 0,014353159 | 0,01265128 | 0,156229522 | 0,6387443  | 5,50390889  | 4,865164562  | 0,746024 | 0,128109755  | 0,626585178 | -0,057302244 | STUM         | y transductain-coding.th protein G00000203685   |
| 51390     | 0,004723592 | 0,01266923 | 0,15598473  | -1,104963  | 8,7982292   | 9,903192018  | 0,03226  | -0,367170829 | 0,025334377 | -0,310199653 | AIG1         | ogen inducin-coding.th protein G00000146416     |

|        |             |            |             |           |             |             |          |              |              |              |           |                                                                            |
|--------|-------------|------------|-------------|-----------|-------------|-------------|----------|--------------|--------------|--------------|-----------|----------------------------------------------------------------------------|
| 23678  | 0,003620953 | 0,01270697 | 0,156138966 | -1,010139 | 5,361118229 | 6,371256942 | 0,268894 | -0,495082017 | 0,282081079  | 0,197698622  | SGK3      | regulated kinase-coding, th protein G00000102205                           |
| 27336  | 0,008180005 | 0,01273067 | 0,156275099 | -0,604745 | 8,295774062 | 8,900518942 | 0,260789 | -0,552464302 | 0,391272043  | 0,068138978  | HTATS1F1  | at specific kinase-coding, th protein G00000102241                         |
| 148046 | 0,013978063 | 0,01275401 | 0,156406612 | 2,1147799 | 5,567093259 | 3,452313317 | 0,532567 | 0,30874359   | 0,077084753  | 1,182384024  | CIRBP-AS1 | antisense non-coding Rlong non-cG00000267493                               |
| 5029   | 0,009051198 | 0,01276602 | 0,156399068 | 0,6932464 | 6,307509212 | 5,614262821 | 0,18612  | 0,283883587  | 0,021742711  | 0,291446148  | P2RY2     | ATP-gamma receptor-coding, th protein G00000175591                         |
| 79683  | 0,011856979 | 0,01278595 | 0,156488456 | 0,6498963 | 6,648775436 | 5,998879111 | 0,762483 | 0,032643701  | 0,0401095329 | 0,346756571  | ZDHHC14   | HHC-type zinc finger-coding, th protein G00000175048                       |
| 1855   | 0,007259458 | 0,01279313 | 0,156421715 | 0,6655909 | 8,748179968 | 8,082589086 | 0,39332  | 0,126452105  | 0,121099671  | 0,256735706  | DVL1      | Wnt signaling protein-coding, th protein G00000107404                      |
| 3937   | 0,016121542 | 0,01290336 | 0,156994595 | 0,5374623 | 5,530862281 | 4,993400009 | 0,360464 | 0,257967016  | 0,412742615  | 0,126078067  | LCP2      | cytosolic protein-coding, th protein G00000043462                          |
| 1427   | 0,005351003 | 0,01293663 | 0,15693691  | -1,115145 | 4,866505047 | 5,981649973 | 0,306849 | -0,112633463 | 0,602364919  | 0,058777887  | CRYGS     | talin gamma-coding, th protein G00000213139                                |
| 136853 | 0,016987656 | 0,01295219 | 0,156665368 | 0,5714197 | 6,426331721 | 5,854912058 | 0,004638 | 0,742455949  | 0,281170742  | -0,1660576   | SSCAD     | lysine rich family-coding, th protein G00000146700                         |
| 728591 | 0,003260834 | 0,01296324 | 0,156646022 | -0,914585 | 4,978915326 | 5,893500437 | 0,383002 | -0,297448309 | 0,705974779  | 0,074466038  | CCDC169   | domain protein-coding, th protein G00000242715                             |
| 57486  | 0,003107093 | 0,01297212 | 0,156600527 | -1,11406  | 7,302112006 | 8,416172263 | 0,032053 | -0,894700733 | 0,491771328  | 0,121617928  | NLN       | neurolysin-coding, th protein G00000123213                                 |
| 11020  | 0,016795651 | 0,01297753 | 0,156513312 | -0,588962 | 7,551093723 | 8,140055295 | 0,695515 | -0,053806525 | 0,449759835  | 0,120612957  | IFT27     | cellular protein-coding, th protein G00000100360                           |
| 7057   | 0,005591929 | 0,01298012 | 0,156392316 | -1,093744 | 11,31318261 | 12,40692624 | 0,002435 | -0,486673577 | 0,08244954   | -0,512324317 | THBS1     | hemidesmosome protein-coding, th protein G00000137801                      |
| 728431 | 0,002883698 | 0,01301209 | 0,156625089 | -1,830403 | 5,674868144 | 7,505271355 | 0,003322 | -1,432522906 | 0,119079699  | -0,396169941 | LINC01137 | non-protein-coding Rlong non-cG00000233621                                 |
| 2870   | 0,011517358 | 0,01307753 | 0,15695523  | 0,6890146 | 8,957661375 | 8,268646611 | 0,546751 | -0,031745103 | 0,130821695  | 0,285779376  | GRK6      | coupled receptor-coding, th protein G00000198055                           |
| 9419   | 0,00809594  | 0,01313394 | 0,157240693 | 0,6412968 | 10,21749473 | 9,576197875 | 0,270076 | 0,285151511  | 0,166608342  | 0,15060648   | CRIP1     | ring interaction protein-coding, th protein G00000119878                   |
| 58525  | 0,016452048 | 0,01314887 | 0,157202079 | 0,5233311 | 6,819501185 | 6,296170099 | 0,495769 | -0,263457197 | 0,326797866  | 0,403323258  | WIZ       | zinc finger protein-coding, th protein G00000011451                        |
| 158801 | 0,010715403 | 0,01319093 | 0,157401083 | -0,522533 | 6,28593521  | 6,808486548 | 0,996853 | 0,002293041  | 0,26798743   | -0,676265897 | NKAPP1    | apoptosis-inducing protein-coding, th protein G00000233382                 |
| 27436  | 0,017139226 | 0,01319569 | 0,157306371 | 0,5046657 | 8,420463113 | 8,20463113  | 0,041441 | 0,289648705  | 0,028639166  | 0,348577074  | EMLA      | ubiquitin-associated protein-coding, th protein G00000143924               |
| 7294   | 0,01647002  | 0,01321049 | 0,157331393 | 0,6986855 | 5,079884685 | 4,381199137 | 0,233124 | 0,293090973  | 0,056374125  | 0,361981629  | TXK       | tyrosine kinase-coding, th protein G00000074966                            |
| 26002  | 0,013714065 | 0,01327684 | 0,157666731 | -0,765937 | 4,288797954 | 5,054790744 | 0,683412 | -0,088699749 | 0,226573122  | -0,307164229 | MOXD1     | deoxygenase Dbeta-coding, th protein G00000079931                          |
| 400221 | 0,015581195 | 0,01335096 | 0,158243525 | -0,935766 | 6,562126519 | 7,497892125 | 0,11085  | -0,503069057 | 0,018750337  | -0,839883996 |           |                                                                            |
| 114883 | 0,017505546 | 0,01335951 | 0,158193487 | 0,57686   | 9,302442104 | 8,725582082 | 0,052892 | 0,394762516  | 0,199104727  | 0,181854617  | OSBPL9    | binding protein-coding, th protein G00000117859                            |
| 128338 | 0,002960713 | 0,01343989 | 0,158841607 | -0,520646 | 8,378492957 | 8,899139429 | 0,397084 | -0,208930874 | 0,105330431  | -0,173974013 | DRAM2     | delayed apoptosis protein-coding, th protein G00000156171                  |
| 10905  | 0,017293511 | 0,01345808 | 0,158753577 | 0,6699539 | 9,507684209 | 8,837730317 | 0,244253 | 0,277292259  | 0,059905634  | 0,392357308  | MAN1A2    | alpha class III phosphatase-coding, th protein G00000198162                |
| 10011  | 0,010744467 | 0,01348408 | 0,158908879 | 0,6442399 | 10,72423767 | 10,07999777 | 0,046924 | 0,298365468  | 0,205881325  | 0,206708366  | SRA1      | deceptor RNA-coding, th protein G00000213523                               |
| 55157  | 0,004032579 | 0,01349049 | 0,158833334 | -0,766474 | 7,134699464 | 7,901173163 | 0,074212 | -0,396717058 | 0,004732913  | -0,525446708 | DARS2     | aminoacyl-tRNA synthetase-coding, th protein G00000117593                  |
| 4153   | 0,013235799 | 0,01350352 | 0,158835771 | 0,7121364 | 5,096325945 | 4,384189496 | 0,010467 | 0,667344418  | 0,673235718  | -0,076018117 | MBL2      | mannose binding protein-coding, th protein G00000165471                    |
| 57834  | 0,010594988 | 0,01350941 | 0,158754261 | 0,5870904 | 6,2671616   | 5,680071153 | 0,083795 | 0,663564583  | 0,901957634  | -0,021885191 | CYP4F11   | limp4 subunit-coding, th protein G00000171903                              |
| 171546 | 0,01155955  | 0,01352908 | 0,158834695 | 0,5535114 | 11,01005158 | 10,45654021 | 0,013298 | 0,406457437  | 0,054421316  | 0,213911805  | SPTSAS    | transferase-coding, th protein G00000165389                                |
| 55556  | 0,013794966 | 0,01362763 | 0,159086934 | -0,51417  | 7,900267195 | 8,144437561 | 0,083929 | -0,310835976 | 0,546299651  | 0,076651332  | ENOSF1    | perforin family protein-coding, th protein G00000132199                    |
| 11031  | 0,005762312 | 0,0136337  | 0,159008028 | -0,564241 | 10,18847991 | 10,75272139 | 0,015005 | -0,407393871 | 0,054687682  | -0,137675419 | RAB31     | small GTPase RAS oncogene family-coding, th protein G00000168461           |
| 440712 | 0,01635884  | 0,01363973 | 0,158928622 | 0,8164892 | 7,908283797 | 7,091794605 | 0,093473 | 0,39617675   | 0,430224461  | 0,180503156  | C1orf186  | open reading frame protein-coding, th protein G00000263961                 |
| 1845   | 0,017614178 | 0,01367191 | 0,158855316 | -0,524256 | 9,032116165 | 9,556371678 | 0,044563 | -0,330017748 | 0,238529831  | -0,151818629 | DUSP3     | mitogen-activated protein phosphatase-coding, th protein G00000108861      |
| 51335  | 0,002313606 | 0,0137223  | 0,159142242 | 0,8155655 | 9,378933508 | 8,563368053 | 0,188859 | 0,133572036  | 0,070373139  | 0,309371853  | NGRN      | neurogranin-coding, th protein G00000182768                                |
| 116151 | 0,011006186 | 0,01378907 | 0,159766939 | -0,583219 | 8,273816382 | 8,857035657 | 0,052763 | -0,67875384  | 0,605884419  | -0,082197778 | FAM210B   | family 2 member B-like protein-coding, th protein G00000124098             |
| 5817   | 0,004030767 | 0,01381106 | 0,159722926 | 0,5811618 | 9,276002868 | 8,694841088 | 0,117425 | 0,217046771  | 0,142917233  | 0,185395383  | PVR       | parvovirus receptor-coding, th protein G00000073008                        |
| 54979  | 0,016168923 | 0,01386693 | 0,160070106 | 0,5546514 | 6,553018727 | 5,998367302 | 0,010201 | 0,277507244  | 0,592833259  | -0,050290848 | HRASL2    | like suppressor of tumorigenesis-coding, th protein G00000133328           |
| 23345  | 0,009115917 | 0,01388029 | 0,160075181 | 0,5001103 | 4,711283168 | 4,211172842 | 0,005682 | 0,472413755  | 0,226996973  | -0,150451593 | SYNE1     | synaptic protein-coding, th protein G00000131018                           |
| 1586   | 0,018197221 | 0,01388725 | 0,160006456 | 0,5519707 | 5,468436853 | 4,916466183 | 0,096525 | 0,493349277  | 0,484849516  | -0,101590291 | CYP17A1   | limp17 subunit-coding, th protein G00000148795                             |
| 53940  | 0,014483631 | 0,01390758 | 0,159943079 | -1,174639 | 13,39730703 | 14,57194586 | 0,227828 | -0,612512314 | 0,333196904  | -0,44245561  | FTHL17    | heavy chain-coding, th protein G00000132446                                |
| 27077  | 0,002375802 | 0,01390871 | 0,159807742 | 1,0815563 | 9,505252733 | 8,423696392 | 0,316511 | 0,286967272  | 0,197343426  | 0,248875386  | B9D1      | beta9 domain-containing protein-coding, th protein G00000108641            |
| 340260 | 0,011393387 | 0,0139093  | 0,159666414 | 0,7190645 | 7,254679082 | 6,535614574 | 0,075368 | 0,714640557  | 0,392585382  | -0,182661013 | UNCX      | UNCX homeobox-coding, th protein G00000164853                              |
| 11014  | 0,00249555  | 0,01391078 | 0,159535479 | 0,9130691 | 12,05933366 | 11,14626746 | 0,002655 | 0,549565433  | 0,039136617  | 0,453252101  | KDELR2    | luminal protein-coding, th protein G00000136240                            |
| 64854  | 0,01525974  | 0,01391742 | 0,159463975 | -1,064367 | 6,577127649 | 7,641494228 | 0,067564 | -0,84237259  | 0,188495321  | 0,276004402  | USP46     | ubiquitin-specific proteinase-coding, th protein G00000109189              |
| 3914   | 0,017360295 | 0,01393675 | 0,159537921 | 0,5127557 | 10,23127123 | 9,718515567 | 0,423959 | 0,07962164   | 0,071103654  | -0,11914961  | LAMB3     | lambda3 subunit-coding, th protein G00000196878                            |
| 6574   | 0,016313721 | 0,01402158 | 0,159477303 | 0,7411476 | 11,9286268  | 11,18747915 | 0,118633 | 0,384551705  | 0,254156101  | 0,46736063   | SLC20A1   | solute carrier family 20 member A1-coding, th protein G00000144136         |
| 83647  | 0,017917921 | 0,01407802 | 0,159825703 | 0,6788536 | 4,015417407 | 3,33653838  | 0,045368 | 1,114764587  | 0,440115202  | -0,281574588 | LINC00529 | non-protein-coding Rlong non-cG00000236827                                 |
| 22841  | 0,00243671  | 0,01411817 | 0,159841966 | 0,6956856 | 9,104410077 | 8,408724514 | 0,179508 | 0,206725842  | 0,137909486  | 0,251680528  | RAB11FIP2 | pleckstrin domain-containing protein-coding, th protein G00000107560       |
| 80760  | 0,0168668   | 0,01412132 | 0,159731642 | 0,7633878 | 3,977292487 | 3,213904724 | 0,066245 | 1,02777322   | 0,605280214  | -0,197682359 | ITIH5     | immunoglobulin heavy chain-binding protein-coding, th protein G00000123243 |
| 55175  | 0,003978091 | 0,0142085  | 0,160132829 | 0,862415  | 7,957764407 | 7,095349444 | 0,027848 | 0,352153038  | 0,070113101  | 0,381630248  | KLHL11    | kelch family member-coding, th protein G00000178502                        |
| 280636 | 0,003313586 | 0,01421532 | 0,160063973 | -0,711583 | 11,43781655 | 12,14939999 | 0,002402 | -0,304731419 | 0,027256241  | -0,147036052 | C11orf31  | L1 open reading frame protein-coding, th protein G00000211450              |
| 6373   | 0,01793685  | 0,01423224 | 0,160108909 | 2,9992695 | 5,554773619 | 2,555504107 | 0,228983 | 1,718300115  | 0,40211026   | 0,999057082  | CXCL11    | chemokine-coding, th protein G00000169248                                  |
| 391211 | 0,002232647 | 0,01426329 | 0,160312603 | 3,4377935 | 3,43779355  | 0           | 0,186972 | 2,092415159  | 0            | 0            | OR2G6     | family 2 subunit-coding, th protein G00000188558                           |
| 84449  | 0,016177164 | 0,01430641 | 0,160506036 | 0,5684469 | 7,17718126  | 6,60873433  | 0,005373 | 0,199949376  | 0,572474935  | 0,070722853  | ZNF333    | zinc finger protein-coding, th protein G00000160961                        |
| 2296   | 0,003328573 | 0,01431194 | 0,160422702 | 0,8429199 | 9,059012644 | 8,21609276  | 0,075528 | 0,314760934  | 0,040685165  | 0,444337239  | FOXC1     | forkhead box C1-coding, th protein G00000054598                            |
| 9732   | 0,012271316 | 0,01439001 | 0,160716094 | 0,6383265 | 7,816147123 | 7,17820586  | 0,425634 | 0,144492866  | 0,123676198  | 0,331802743  | DOCK4     | effector of cytoskeleton-coding, th protein G00000128512                   |
| 375287 | 0,004590268 | 0,01443067 | 0,161024994 | -0,794028 | 7,679172516 | 8,473200304 | 0,980654 | -0,006747632 | 0,053639933  | -0,526092232 | RBM43     | ring motif protein-coding, th protein G00000184898                         |
| 646268 | 0,008392847 | 0,01444432 | 0,160887379 | 1,865764  | 3,347704101 | 1,481940071 | 0,207579 | 2,153538231  | 0,837559603  | -0,284039951 |           |                                                                            |

|           |             |            |             |                   |             |             |          |               |             |              |                                                         |
|-----------|-------------|------------|-------------|-------------------|-------------|-------------|----------|---------------|-------------|--------------|---------------------------------------------------------|
| 23576     | 0,006939298 | 0,01455103 | 0,161639872 | <b>0,7057346</b>  | 8,97156617  | 8,265831556 | 0,212159 | 0,332861405   | 0,106083751 | 0,306910591  | DDAH1 dimethylarginine-coding, th protein G00000153904  |
| 286234    | 0,003734572 | 0,01457239 | 0,161732156 | <b>0,9988398</b>  | 5,249952253 | 4,251112485 | 0,010045 | 1,12022849    | 0,388234732 | -0,198542184 | SPATA31E1ubfamily E3in-coding, th protein G00000177992  |
| 54922     | 0,004241217 | 0,01457621 | 0,161629688 | <b>-0,6466939</b> | 5,331927579 | 5,978866861 | 0,664393 | -0,10045937   | 0,09374841  | -0,269948342 | RASIP1 eracting prain-coding, th protein G00000105538   |
| 346653    | 0,004596157 | 0,01464832 | 0,161994213 | <b>0,6447976</b>  | 6,608636602 | 5,963838975 | 0,494341 | -0,180171653  | 0,593999215 | 0,094750015  | FAM71F2 nce similarain-coding, th protein G00000205085  |
| 100129427 | 0,014503978 | 0,01465641 | 0,161939046 | <b>1,4110535</b>  | 5,323511214 | 3,912457759 | 0,23902  | 0,470899704   | 0,038619658 | 0,922703958  | DDC-AS1 antisense Fn-coding, Rl long non-cG00000226122  |
| 493856    | 0,019053506 | 0,01466235 | 0,161860381 | <b>-1,007401</b>  | 8,886548018 | 9,893948831 | 0,233841 | -0,632425824  | 0,941593135 | 0,022197936  | CISD2 ron sulfur ein-coding, th protein G00000145354    |
| 6734      | 0,005043715 | 0,01468342 | 0,161804472 | <b>0,7547122</b>  | 10,04389048 | 9,289178238 | 0,025708 | 0,3180602     | 0,060060478 | 0,397286954  | SRPRA ptor alphaain-coding, th protein G00000182934     |
| 3164      | 0,014216015 | 0,01468407 | 0,161667813 | <b>0,8084938</b>  | 6,365393631 | 5,556899793 | 0,057317 | 0,474750739   | 0,863633491 | -0,025931778 | NR4A1 ubfamily 4 ain-coding, th protein G00000123358    |
| 10139     | 0,018093782 | 0,01470772 | 0,161497534 | <b>0,5043174</b>  | 9,323145309 | 8,818827955 | 0,152778 | 0,244110622   | 0,865428352 | 0,024786511  | ARFRP1 n factor reain-coding, th protein G00000101246   |
| 5272      | 0,018649639 | 0,01471105 | 0,161384955 | <b>0,6299462</b>  | 8,035889666 | 7,405943431 | 0,502984 | 0,272855797   | 0,60789994  | 0,118190466  | SERPINB9 amily B meain-coding, th protein G00000170542  |
| 4670      | 0,002399064 | 0,01471598 | 0,161302275 | <b>0,5121329</b>  | 10,3225268  | 9,810393883 | 0,125815 | 0,205454884   | 0,007341962 | 0,257234539  | HNRNP nuclear ribosain-coding, th protein G00000099783  |
| 128602    | 0,010874444 | 0,01480957 | 0,161898246 | <b>0,5951509</b>  | 5,397067541 | 4,801916634 | 0,268453 | 0,497840325   | 0,108662908 | 0,285576029  | C2orf85 20 open reain-coding, th protein G00000124237   |
| 26038     | 0,00783536  | 0,01485671 | 0,162127428 | <b>0,5478656</b>  | 5,997929498 | 5,450063889 | 0,113031 | 0,418116071   | 0,578772085 | 0,063988866  | CHD5 hlicase DNain-coding, th protein G00000116254      |
| 283143    | 0,019196481 | 0,01487027 | 0,162132579 | <b>0,6959085</b>  | 8,29873343  | 7,602824969 | 0,148182 | 0,575873772   | 0,627289493 | 0,071855456  | LINC009000on-proteinn-coding, Rl long non-cG00000246100 |
| 84275     | 0,002746893 | 0,01489424 | 0,162251025 | <b>0,7016808</b>  | 8,471540161 | 7,769893885 | 0,012903 | 0,37894869    | 0,0252593   | 0,384912856  | SLC25A33r family 25ain-coding, th protein G00000171612  |
| 7094      | 0,01828523  | 0,01490938 | 0,162130846 | <b>0,5575577</b>  | 9,584051268 | 9,026493571 | 0,178874 | 0,234239431   | 0,287004997 | 0,193806614  | TLN1 talin 1 ain-coding, th protein G00000137076        |
| 5806      | 0,00587069  | 0,01492136 | 0,162118753 | <b>0,9887832</b>  | 7,364125773 | 6,375342593 | 0,869808 | 0,041991684   | 0,455823395 | 0,176256898  | PTX3 pentraxin 3in-coding, th protein G00000163661      |
| 6456      | 0,014771351 | 0,014935   | 0,162124733 | <b>0,6698036</b>  | 4,923712825 | 4,253909528 | 0,81077  | 0,117287532   | 0,060352689 | 0,421712327  | SH3GL2 iing GRB2 lain-coding, th protein G00000107295   |
| 55171     | 0,007492829 | 0,01497149 | 0,162236424 | <b>-0,514041</b>  | 6,25502263  | 7,13906404  | 0,352461 | -0,256274451  | 0,341519375 | 0,156133935  | TBCCD1 main contain-coding, th protein G00000113838     |
| 47        | 0,004779369 | 0,01500202 | 0,162000335 | <b>0,9162086</b>  | 10,0478432  | 9,131634549 | 0,008046 | 0,416731271   | 0,189879315 | 0,253766101  | ACLY P citrate lyain-coding, th protein G00000131473    |
| 29968     | 0,014418133 | 0,01500779 | 0,161921459 | <b>0,7817719</b>  | 8,528133883 | 7,746362022 | 0,185577 | -0,169294568  | 0,023876516 | 0,839668094  | PSAT1 ine aminotain-coding, th protein G00000135069     |
| 5680      | 0,018026498 | 0,01504768 | 0,162210623 | <b>-1,898226</b>  | 4,728686727 | 6,62691243  | 0,200977 | -0,535941848  | 0,203639166 | -0,686222763 | PSG1 ific beta-1-ain-coding, th protein G00000243130    |
| 57584     | 0,01942162  | 0,01505223 | 0,162118498 | <b>-0,802432</b>  | 8,838910214 | 9,641342316 | 0,064628 | -0,575627352  | 0,469278464 | -0,127242605 | ARHGAP21 activatingain-coding, th protein G00000107863  |
| 55924     | 0,019375676 | 0,01507079 | 0,162036591 | <b>0,789639</b>   | 5,991170936 | 5,201531907 | 0,003673 | 0,710132793   | 0,467958955 | 0,133209158  | FAM212B nce similarain-coding, th protein G00000197852  |
| 403341    | 0,019251781 | 0,01511195 | 0,162197614 | <b>0,5345721</b>  | 9,199266998 | 8,664694862 | 0,015422 | 0,515080489   | 0,320561727 | -0,148809249 | ZBTB34 BTB domainin-coding, th protein G00000171215     |
| 29766     | 0,007009191 | 0,01515331 | 0,162219815 | <b>-1,402704</b>  | 9,046821422 | 10,44952587 | 0,000891 | -1,180731894  | 0,691249227 | -0,107681673 | TMOD3 pmodulilain-coding, th protein G00000138594       |
| 259232    | 0,01879203  | 0,01515491 | 0,162096829 | <b>0,549295</b>   | 4,914143551 | 4,364848559 | 0,16074  | 0,400035375   | 0,688126213 | 0,08005163   | NALCN channel, nain-coding, th protein G00000102452     |
| 7525      | 0,017993639 | 0,01516219 | 0,162034803 | <b>-0,842443</b>  | 7,992935304 | 8,835378542 | 0,035893 | -0,669098156  | 0,215509174 | -0,231723019 | YES1 e 1, Src farain-coding, th protein G00000176105    |
| 23478     | 0,009808937 | 0,01518911 | 0,162182556 | <b>-0,806555</b>  | 10,65088234 | 11,45743712 | 0,147192 | -0,361390298  | 0,364796842 | -0,222307706 | SEC11A gnal peptidain-coding, th protein G00000140612   |
| 55163     | 0,008764989 | 0,01521373 | 0,162026359 | <b>-0,602104</b>  | 8,340211855 | 8,942513715 | 0,213052 | -0,133559707  | 0,93606583  | 0,010428157  | PNPO e 5'-phosphain-coding, th protein G00000108439     |
| 23630     | 0,009242933 | 0,01523208 | 0,161804422 | <b>1,1394251</b>  | 8,185300369 | 7,045875238 | 0,036418 | 0,424438336   | 0,217535592 | 0,343446919  | KCNES annel subfain-coding, th protein G00000176076     |
| 3196      | 0,01730151  | 0,01530798 | 0,162332235 | <b>0,614853</b>   | 6,843438751 | 6,228585753 | 0,777827 | 0,113843859   | 0,329912615 | 0,363042263  | TLX2 ikemia homain-coding, th protein G00000115297      |
| 100289388 | 0,019795565 | 0,01539903 | 0,162879357 | <b>-0,812811</b>  | 5,93498179  | 6,747792689 | 0,031949 | -0,2399262011 | 0,228053116 | 0,352495975  | CTD21-AS1 antisense-coding, Rl long non-cG00000246174   |
| 7428      | 0,011279866 | 0,01541733 | 0,162933818 | <b>0,5688872</b>  | 9,255436155 | 8,868548924 | 0,340836 | 0,098163724   | 0,245079465 | 0,16436317   | VHL ndau tumcain-coding, th protein G00000134086        |
| 115509    | 0,014618407 | 0,01547505 | 0,163404386 | <b>0,7121229</b>  | 8,269604652 | 7,557481714 | 0,340053 | 0,188565021   | 0,354472951 | 0,19029902   | ZNF689 nger proteain-coding, th protein G00000156853    |
| 91319     | 0,019153236 | 0,01549014 | 0,163424463 | <b>0,6551977</b>  | 7,718540069 | 7,063342414 | 0,036592 | 0,664165749   | 0,919978568 | -0,01273343  | DERL3 derlin 3 ain-coding, th protein G00000099958      |
| 2118      | 0,018779733 | 0,01549423 | 0,163328396 | <b>0,7734492</b>  | 8,264864338 | 7,491415142 | 0,030454 | 0,488740469   | 0,097330684 | 0,386471475  | ETV4 TS variant ain-coding, th protein G00000175832     |
| 51182     | 0,005379853 | 0,01551109 | 0,163367091 | <b>-0,701695</b>  | 8,968329528 | 9,670024266 | 0,012883 | -0,404152201  | 0,086063689 | 0,18041039   | HSPA14 family A (ain-coding, th protein G00000187522    |
| 50854     | 0,019357318 | 0,01552713 | 0,163397151 | <b>0,8159474</b>  | 12,19365158 | 11,37770416 | 0,119669 | 0,389181554   | 0,502303395 | -0,116462069 | C6orf48 6 open reain-coding, th protein G00000204387    |
| 10866     | 0,0083462   | 0,01552975 | 0,163285952 | <b>-0,561762</b>  | 9,121611008 | 9,773733052 | 0,633469 | -0,072425007  | 0,243353514 | -0,123846281 | HCP5 P5 (non-prn-coding, Rl long non-cG00000206337      |
| 28964     | 0,01213054  | 0,01561306 | 0,163883725 | <b>-0,56392</b>   | 7,380590192 | 7,944510299 | 0,135886 | -0,382766997  | 0,904210314 | -0,022352793 | GIT1 iIT ArfGAP ain-coding, th protein G00000108262     |
| 826       | 0,016651479 | 0,01564927 | 0,163847199 | <b>-0,520377</b>  | 12,2509983  | 12,77137482 | 0,25227  | -0,147188016  | 0,740517894 | -0,044917563 | CAPNS1 n small subtain-coding, th protein G00000126247  |
| 80129     | 0,020040464 | 0,0156542  | 0,163622145 | <b>1,4019488</b>  | 3,7725583   | 2,370609461 | 0,010343 | 0,683164932   | 0,080783562 | 0,746318083  | CCDC170 lomain corain-coding, th protein G00000120262   |
| 11328     | 0,007285532 | 0,01565698 | 0,16337549  | <b>-0,68447</b>   | 8,359980589 | 9,044450843 | 0,083873 | -0,254226184  | 0,174281918 | -0,238284107 | FKBP9 binding prein-coding, th protein G00000122642     |
| 84100     | 0,017335272 | 0,01567574 | 0,163296158 | <b>0,9175924</b>  | 7,20558061  | 6,287988188 | 0,490711 | 0,286832587   | 0,314754229 | 0,22213798   | ARL6 ion factor ain-coding, th protein G00000113966     |
| 26686     | 0,011530837 | 0,01568826 | 0,16315213  | <b>1,5845005</b>  | 4,213414581 | 2,628914064 | 0,142018 | 1,032323905   | 0,942387774 | -0,041689636 | OR4E2 amily 4 subtain-coding, th protein G00000221977   |
| 728763    | 0,019132279 | 0,01569215 | 0,163055662 | <b>0,675544</b>   | 5,750641668 | 4,900097718 | 0,729958 | 0,080106129   | 0,524082315 | 0,101717541  | CROCC2 coil, rootleain-coding, th protein G00000226321  |
| 152503    | 0,003062304 | 0,01571454 | 0,163151453 | <b>-0,740419</b>  | 8,228813604 | 8,969232224 | 0,084713 | -0,252081152  | 0,560334002 | -0,069863089 | SH3D19 nain contain-coding, th protein G00000109686     |
| 121512    | 0,016450829 | 0,01573953 | 0,16327399  | <b>-0,959242</b>  | 4,550310135 | 5,509551792 | 0,038246 | -0,668710543  | 0,608221354 | -0,09091582  | FGD4 nd PH domain-coding, th protein G00000139132       |
| 1829      | 0,014227579 | 0,01579421 | 0,163567239 | <b>-1,208435</b>  | 7,37112533  | 8,579560069 | 0,027138 | -0,72384799   | 0,461752223 | -0,217587983 | DSG2 esmoglein ain-coding, th protein G00000046604      |
| 2230      | 0,018524309 | 0,01588999 | 0,164284482 | <b>-0,622202</b>  | 8,895739603 | 9,517941866 | 0,019825 | -0,47179552   | 0,505692672 | -0,094931912 | FDX1 erredoxin 3in-coding, th protein G00000137714      |
| 7407      | 0,006132549 | 0,01590579 | 0,164310668 | <b>0,6874105</b>  | 10,00855012 | 9,321139653 | 0,071175 | 0,259154921   | 0,130537629 | 0,264158119  | VARS tRNA synthain-coding, th protein G00000204394      |
| 1509      | 0,009703387 | 0,01599207 | 0,164926823 | <b>-0,527492</b>  | 12,64102739 | 13,16851928 | 0,224774 | -0,160941251  | 0,078047187 | -0,273303306 | CTSD athepsin 1ain-coding, th protein G00000117984      |
| 729967    | 0,018495088 | 0,01609028 | 0,165801591 | <b>-0,925565</b>  | 8,275895855 | 9,20146131  | 0,283729 | -0,394761583  | 0,260371537 | -0,438570412 | MORN2 epeat contain-coding, th protein G000001188010    |
| 8687      | 0,018842704 | 0,01610384 | 0,165665671 | <b>1,66014</b>    | 4,135610137 | 2,47560137  | 0,037048 | 1,140669704   | 0,108139821 | 0,781745871  | KRT38 keratin 38 ain-coding, th protein G00000171360    |
| 144100    | 0,011566678 | 0,01610639 | 0,165554428 | <b>-0,694224</b>  | 6,711384975 | 7,405608658 | 0,580184 | -0,084013309  | 0,059587498 | -0,350874374 | PLEKHA7 logy domain-coding, th protein G00000166689     |
| 6349      | 0,017214067 | 0,0161715  | 0,165810932 | <b>0,5264754</b>  | 7,145603306 | 6,619127875 | 0,122743 | 0,619767968   | 0,511014488 | -0,124831436 | CCL3L1 emokine liain-coding, th protein product         |
| 91768     | 0,004031681 | 0,01618734 | 0,165836067 | <b>-0,815699</b>  | 6,776205159 | 7,591904324 | 0,159038 | -0,459699691  | 0,984571467 | -0,003323856 | CABLES1 bl enzyme ain-coding, th protein G00000134508   |
| 387882    | 0,006922047 | 0,01619753 | 0,165803326 | <b>0,7464955</b>  | 9,045472622 | 8,298977125 | 0,061475 | 0,521240013   | 0,33608389  | 0,186621095  | C12orf75 12 open reain-coding, th protein G00000235162  |

|           |             |            |             |                  |             |             |           |              |             |              |           |                                       |           |                         |
|-----------|-------------|------------|-------------|------------------|-------------|-------------|-----------|--------------|-------------|--------------|-----------|---------------------------------------|-----------|-------------------------|
| 4295      | 0,01970593  | 0,01626116 | 0,166180167 | <b>0,7747323</b> | 6,002275842 | 5,227543576 | 0,071116  | 0,377619662  | 0,158679797 | 0,262319507  | MLN       | motilin                               | in-coding | th protein G00000096395 |
| 2271      | 0,018548735 | 0,01626376 | 0,166069485 | <b>0,7019243</b> | 10,76139043 | 10,05946613 | 0,986601  | 0,003387764  | 0,085530847 | 0,381298426  | FH        | urate hydratase                       | in-coding | th protein G00000091483 |
| 10069     | 0,019551666 | 0,01630576 | 0,166087617 | <b>-0,509989</b> | 7,782946858 | 8,292935724 | 0,193675  | -0,121758893 | 0,181958016 | 0,192575363  | RWDD2B    | main component                        | in-coding | th protein G00000156253 |
| 399818    | 0,004833242 | 0,01630645 | 0,165958107 | <b>-0,64213</b>  | 8,04872548  | 6,980855711 | 0,145422  | -0,310349577 | 0,64826302  | 0,058375243  | METTL10   | transferase                           | in-coding | th protein G00000203791 |
| 56204     | 0,02030969  | 0,01632617 | 0,165886184 | <b>-0,750348</b> | 6,665625237 | 2,740042    | -0,270042 | -0,339328946 | 0,592220832 | -0,079808449 | FAM214A   | nucleosome similar                    | in-coding | th protein G00000047346 |
| 55663     | 0,006522509 | 0,01632864 | 0,165775288 | <b>0,5771398</b> | 7,023755348 | 6,446615565 | 0,490059  | 0,138145742  | 0,150574855 | 0,242162202  | ZNF446    | zinc finger protein                   | in-coding | th protein G00000083838 |
| 254295    | 0,020475307 | 0,0163442  | 0,165526272 | <b>-0,671977</b> | 9,215484531 | 9,887461505 | 0,415548  | -0,261059971 | 0,151420561 | -0,295143694 | PHYHD1    | cytoglycogenase                       | in-coding | th protein G00000175287 |
| 98        | 0,004108558 | 0,01634442 | 0,165393264 | <b>1,3297797</b> | 10,69705826 | 9,367278533 | 0,012811  | 0,566162792  | 0,140308637 | 0,426542147  | ACYP2     | phosphatase                           | in-coding | th protein G00000170634 |
| 2512      | 0,005817912 | 0,01634857 | 0,165165359 | <b>-0,529547</b> | 15,90342034 | 16,43296732 | 0,666179  | -0,042549442 | 0,003911957 | -0,482951282 | FTL       | light chain                           | in-coding | th protein G00000087086 |
| 231       | 0,019361691 | 0,01645985 | 0,165883638 | <b>-1,325125</b> | 11,91331559 | 13,23844084 | 0,063986  | -0,755139391 | 0,497030954 | -0,188623248 | AKR1B1    | phosphatase                           | in-coding | th protein G00000085662 |
| 23228     | 0,006065475 | 0,01651893 | 0,165804558 | <b>-2,418074</b> | 4,661966499 | 7,080040038 | 0,055675  | -1,903821112 | 0,627737558 | 0,21670803   | PLCL2     | phospholipase C                       | in-coding | th protein G00000154822 |
| 3726      | 0,006618497 | 0,01657315 | 0,166214057 | <b>0,5345978</b> | 8,712087817 | 8,177490025 | 0,103327  | 0,364727152  | 0,249166304 | 0,220110394  | JUNB      | AP-1 transcription factor             | in-coding | th protein G00000171223 |
| 11199     | 0,004134609 | 0,0165888  | 0,166236466 | <b>0,674213</b>  | 5,576194525 | 4,901981546 | 0,258104  | 0,4272822    | 0,238202796 | -0,448738322 | ANXA10    | annexin A1                            | in-coding | th protein G00000109511 |
| 9448      | 0,007852171 | 0,01659564 | 0,166170502 | <b>-1,086561</b> | 9,335012712 | 10,42157378 | 0,033097  | -0,492042031 | 0,909172328 | -0,025241778 | MAP4K4    | protein kinase                        | in-coding | th protein G00000071054 |
| 92162     | 0,020901425 | 0,01661159 | 0,166061775 | <b>0,6829544</b> | 7,292628039 | 6,609673599 | 0,014285  | 0,536897528  | 0,491093818 | 0,116389811  | TMEM88    | membrane protein                      | in-coding | th protein G00000167874 |
| 55454     | 0,019322677 | 0,01667844 | 0,166193531 | <b>0,7457233</b> | 8,5261425   | 7,780419249 | 0,278373  | 0,217070554  | 0,080191108 | 0,442914032  | SGALNACT  | acetylglucosylase                     | in-coding | th protein G00000116826 |
| 59284     | 0,019097294 | 0,01673402 | 0,166613316 | <b>0,7760293</b> | 5,789302518 | 5,013273171 | 0,093132  | 0,49022893   | 0,254264198 | 0,274132093  | CACNG7    | channel                               | in-coding | th protein G00000105605 |
| 55916     | 0,00473081  | 0,01674183 | 0,166557159 | <b>-0,506234</b> | 6,859476683 | 7,36218173  | 0,23489   | -0,140129736 | 0,223839079 | -0,140979292 | NXT2      | transcription factor 2                | in-coding | th protein G00000101888 |
| 10863     | 0,008637712 | 0,0167934  | 0,166668621 | <b>-1,102139</b> | 5,422623488 | 6,524262348 | 0,80617   | -0,742590953 | 0,055352874 | -0,863652356 | ADAM28    | metalloproteinase                     | in-coding | th protein G00000042980 |
| 1437      | 0,019434946 | 0,01679894 | 0,166590062 | <b>-0,962778</b> | 9,510707445 | 10,47348565 | 0,085495  | -0,477089265 | 0,477083957 | 0,174520332  | CSF2      | stimulating factor                    | in-coding | th protein G00000164400 |
| 7980      | 0,004236914 | 0,01680554 | 0,166522178 | <b>0,8207677</b> | 12,24745716 | 11,42668946 | 0,003422  | 0,593430032  | 0,637782936 | -0,071211281 | TFPI2     | transforming growth factor pathway    | in-coding | th protein G00000105825 |
| 10383     | 0,017796291 | 0,01681062 | 0,166439374 | <b>0,5476248</b> | 11,43600074 | 11,98362553 | 0,848979  | 0,038208157  | 0,140916508 | 0,247170021  | TUBB4B    | beta 4 tubulin                        | in-coding | th protein G00000188229 |
| 3777      | 0,007232524 | 0,01687511 | 0,166811243 | <b>0,5020032</b> | 7,016929794 | 6,514926556 | 0,01765   | 0,638418949  | 0,235939848 | -0,137508246 | KCNK3     | potassium channel                     | in-coding | th protein G00000171303 |
| 120863    | 0,018179853 | 0,01689064 | 0,166698608 | <b>-0,868847</b> | 3,192392257 | 4,061238994 | 0,228958  | -1,123934054 | 0,17253883  | 0,41004708   | DEPDC4    | domain containing                     | in-coding | th protein G00000166153 |
| 1519      | 0,012193911 | 0,01689593 | 0,16809561  | <b>-1,821356</b> | 4,630450758 | 6,451806782 | 0,108826  | -0,899915935 | 0,067149507 | -1,171044145 | CTS0      | cathepsin C                           | in-coding | th protein G00000256043 |
| 401505    | 0,020674127 | 0,01706919 | 0,16805907  | <b>0,7026253</b> | 8,440106855 | 7,737454566 | 0,240051  | 0,16767977   | 0,462973125 | 0,136910292  | TOMM5     | mitochondrial                         | in-coding | th protein G00000175768 |
| 81606     | 0,017028846 | 0,01708161 | 0,168047778 | <b>0,5569567</b> | 7,563354397 | 7,006397649 | 0,057703  | 0,417066399  | 0,34586825  | 0,110206688  | LBH       | left heart                            | in-coding | th protein G00000213626 |
| 4883      | 0,018932918 | 0,01708573 | 0,16795489  | <b>1,890183</b>  | 3,521993159 | 1,631810197 | 0,137995  | 2,135035943  | 0,546189537 | -0,688998163 | NPR3      | receptor peptide                      | in-coding | th protein G00000113389 |
| 400673    | 0,014030521 | 0,01713146 | 0,167769522 | <b>-0,748255</b> | 6,340861061 | 7,089115933 | 0,015669  | -0,970300478 | 0,830056637 | -0,022138224 | VMAC      | filament associated                   | in-coding | th protein G00000187650 |
| 11009     | 0,018352872 | 0,01713875 | 0,167545327 | <b>0,8404696</b> | 6,689483318 | 6,89433318  | 0,110614  | 0,870033825  | 0,304384671 | 0,322775242  | IL24      | interleukin 24                        | in-coding | th protein G00000162892 |
| 10236     | 0,01983324  | 0,01715586 | 0,167580312 | <b>0,6587242</b> | 11,04786422 | 10,38914    | 0,805351  | 0,035954085  | 0,150621639 | 0,239104134  | HNRNRP    | nuclear ribonucleoprotein             | in-coding | th protein G00000125944 |
| 8892      | 0,007533825 | 0,01717368 | 0,167622154 | <b>0,597914</b>  | 10,26532852 | 9,66741449  | 0,05183   | 0,303450521  | 0,291413469 | 0,143784923  | EIF2B2    | translation initiation factor         | in-coding | th protein G00000119718 |
| 221442    | 0,00517695  | 0,01718261 | 0,167577295 | <b>1,3066888</b> | 4,350144522 | 5,656833353 | 0,981577  | -0,006304067 | 0,04025674  | 0,765591989  | ADCY10P1e | adenylyl cyclase 10                   | in-coding | th protein G00000161912 |
| 5132      | 0,007263539 | 0,01721162 | 0,167728157 | <b>1,1600986</b> | 5,337804801 | 4,177706213 | 0,126315  | 0,563014691  | 0,503356606 | -0,188392599 | PDC       | phosphodiesterase                     | in-coding | th protein G00000116703 |
| 401285    | 0,009034616 | 0,01721996 | 0,167677438 | <b>0,5596798</b> | 5,458543419 | 4,898863636 | 0,074534  | 0,426881908  | 0,821411982 | 0,029427933  | TCP10L2   | complex 10                            | in-coding | th protein G00000166984 |
| 84769     | 0,020492389 | 0,01722521 | 0,167596816 | <b>0,7150866</b> | 8,834053077 | 8,11896645  | 0,021441  | 0,432756669  | 0,266220261 | 0,216673605  | MPV17L2   | inner membrane                        | in-coding | th protein G00000254858 |
| 64940     | 0,003824079 | 0,01725069 | 0,167581438 | <b>0,8680085</b> | 8,321054964 | 7,453046428 | 0,110429  | 0,245610269  | 0,074425027 | 0,368869348  | STAG3L4   | chromatin associated protein 3-like 4 | in-coding | th protein G00000106610 |
| 30061     | 0,01943962  | 0,0173149  | 0,167941803 | <b>-1,346539</b> | 3,848702558 | 5,195241351 | 0,189937  | -0,655056396 | 0,338889207 | 0,268305776  | SLC40A1   | solute carrier family 40              | in-coding | th protein G00000138449 |
| 246184    | 0,006453853 | 0,01733214 | 0,167977478 | <b>-0,900191</b> | 9,286015723 | 10,18620672 | 0,252515  | -0,306071961 | 0,816052441 | -0,036371729 | CDC26     | cell division cycle                   | in-coding | th protein G00000176386 |
| 27129     | 0,013859716 | 0,01734092 | 0,167931147 | <b>0,6950786</b> | 4,785489232 | 4,090410667 | 0,16592   | 0,667210991  | 0,537958209 | -0,23704825  | HSPB7     | heat shock protein family B           | in-coding | th protein G00000173641 |
| 79633     | 0,020652744 | 0,01734815 | 0,167869908 | <b>-0,9351</b>   | 7,321038203 | 8,256138181 | 0,138876  | -0,432435515 | 0,023733404 | -0,70886701  | FAT4      | typical cadherin                      | in-coding | th protein G00000196159 |
| 647024    | 0,01668691  | 0,01743304 | 0,168428184 | <b>0,5496178</b> | 8,738582667 | 8,188964884 | 0,137795  | 0,34843284   | 0,466798624 | 0,095987412  | C6orf132  | chromosome 6 open reading frame       | in-coding | th protein G00000188112 |
| 151963    | 0,009855068 | 0,01746069 | 0,168563894 | <b>-0,849141</b> | 5,760341573 | 6,609482277 | 0,168317  | -0,425034039 | 0,925438688 | 0,022175184  | MB21D2    | myosin domain                         | in-coding | th protein G00000180611 |
| 85315     | 0,010390514 | 0,01748567 | 0,168542243 | <b>-0,746007</b> | 4,761804469 | 5,507811154 | 0,277608  | -0,237155829 | 0,674946012 | 0,057773458  | PAQR8     | oligomeric receptor                   | in-coding | th protein G00000170915 |
| 27131     | 0,019061506 | 0,01756545 | 0,169179638 | <b>-0,570459</b> | 9,442967065 | 10,01342578 | 0,301833  | -0,184709961 | 0,838576684 | -0,0373525   | SNX5      | sorting nexin                         | in-coding | th protein G00000089006 |
| 51076     | 0,021754231 | 0,01757691 | 0,169158465 | <b>0,5758315</b> | 9,215877619 | 8,640046105 | 0,029699  | 0,276308563  | 0,071027593 | 0,322481654  | CUTC      | cupper                                | in-coding | th protein G00000119929 |
| 400684    | 0,003229335 | 0,01760118 | 0,169129202 | <b>0,8742399</b> | 7,39905062  | 6,524810684 | 0,514738  | -0,137727448 | 0,026729031 | 0,551737404  |           |                                       |           |                         |
| 55164     | 0,021770862 | 0,01773644 | 0,169770364 | <b>-0,631657</b> | 6,363179734 | 6,994837159 | 0,200171  | -0,506055427 | 0,127830783 | 0,261041818  | SHQ1      | nucleoprotein                         | in-coding | th protein G00000144736 |
| 553       | 0,003375427 | 0,01779048 | 0,169893755 | <b>0,5487457</b> | 5,24413035  | 4,695384684 | 0,041111  | 0,785474793  | 0,38745883  | -0,204496485 | AVPR1B    | vasopressin                           | in-coding | th protein G00000198049 |
| 5420      | 0,017959561 | 0,01783664 | 0,170203307 | <b>-0,618014</b> | 8,994443733 | 9,612457425 | 0,006423  | -0,504069646 | 0,572974333 | 0,06715902   | PODXL     | dolichalxin                           | in-coding | th protein G00000128567 |
| 29916     | 0,00843029  | 0,01784464 | 0,17014859  | <b>0,5674271</b> | 7,319245244 | 6,751818138 | 0,938907  | 0,007535017  | 0,030447803 | 0,17885233   | SNX11     | sorting nexin                         | in-coding | th protein G00000002919 |
| 650368    | 0,01777073  | 0,01784609 | 0,170031526 | <b>0,5050894</b> | 9,213011419 | 8,707922024 | 0,165159  | 0,190499363  | 0,315535419 | 0,151819162  | TSSC2     | transmembrane signaling               | in-coding | th protein G00000223756 |
| 54885     | 0,021970654 | 0,01795014 | 0,170760185 | <b>-0,977294</b> | 4,755094973 | 5,732388909 | 0,185555  | -0,649066112 | 0,447173076 | -0,20562505  | TBC1D8B   | phosphatase                           | in-coding | th protein G00000131338 |
| 3658      | 0,007535797 | 0,01798014 | 0,170783249 | <b>-0,968313</b> | 7,071786073 | 8,040099565 | 0,038775  | -0,653714923 | 0,870851945 | -0,03036911  | IREB2     | element                               | in-coding | th protein G00000136381 |
| 5861      | 0,003814321 | 0,01802311 | 0,170929211 | <b>0,5433278</b> | 10,39387537 | 10,39387537 | 0,259103  | 0,187686551  | 0,097174783 | 0,212494604  | RAB1A     | small GTPase RAS                      | in-coding | th protein G00000138069 |
| 100128364 | 0,02204585  | 0,01812549 | 0,171637268 | <b>-0,787853</b> | 9,122578011 | 9,910430759 | 0,514186  | -0,066984403 | 0,037671651 | -0,550459107 |           |                                       |           |                         |
| 6482      | 0,016121751 | 0,01812683 | 0,171518866 | <b>0,5402628</b> | 7,503940292 | 6,96367731  | 0,242044  | 0,167429051  | 0,616926842 | -0,07402117  | ST3GAL1   | alpha-2,3-galactosyltransferase       | in-coding | th protein G00000008513 |
| 152559    | 0,007229716 | 0,01820588 | 0,171742004 | <b>0,6266579</b> | 7,077312855 |             |           |              |             |              |           |                                       |           |                         |

|           |              |            |             |                  |              |             |          |              |              |              |             |                                                  |
|-----------|--------------|------------|-------------|------------------|--------------|-------------|----------|--------------|--------------|--------------|-------------|--------------------------------------------------|
| 2819      | 0,022352865  | 0,01827872 | 0,172036066 | <b>0,686434</b>  | 4,837106311  | 4,150672356 | 0,814441 | -0,047045517 | 0,045577544  | 0,591861123  | GPD1        | osphate dehisin-coding, th protein G00000167588  |
| 64374     | 0,022143288  | 0,01828507 | 0,171965154 | <b>0,5355834</b> | 9,65440222   | 9,118818783 | 0,07094  | 0,199450229  | 0,125958044  | 0,244659299  | SIL1        | otide exchasin-coding, th protein G00000120725   |
| 9023      | 0,005685877  | 0,01833556 | 0,17230919  | <b>1,3648873</b> | 8,347045412  | 6,982158161 | 0,012098 | 1,283851421  | 0,570122436  | 0,189758564  | CH25H       | rol 25-hydrasin-coding, th protein G00000138135  |
| 9823      | 0,008567654  | 0,0183553  | 0,172363939 | <b>0,7391904</b> | 6,670318691  | 5,931128333 | 0,019045 | 0,466694689  | 0,19289348   | -0,117324361 | ARMCX2      | at containasin-coding, th protein G00000184867   |
| 8422      | 0,022121677  | 0,01837098 | 0,172380448 | <b>0,6999122</b> | 4,395650586  | 3,695738393 | 0,641119 | 0,143265313  | 0,221362907  | 0,35762048   | SFRP1       | zzled relatasin-coding, th protein G00000104332  |
| 84223     | 0,017760357  | 0,01840711 | 0,172458201 | <b>-0,797956</b> | 5,221368287  | 6,019324136 | 0,038664 | -0,630091336 | 0,426435787  | -0,171999672 | IQCG        | otif containasin-coding, th protein G00000114473 |
| 144608    | 0,0222121688 | 0,01854588 | 0,172973277 | <b>-0,907296</b> | 4,351931878  | 5,259228144 | 0,186905 | -0,645134462 | 0,806447092  | 0,075224512  | C12orf60    | L2 open resasin-coding, th protein G00000182993  |
| 4673      | 0,011589828  | 0,01859079 | 0,173261685 | <b>-0,632522</b> | 11,87653183  | 12,5090539  | 0,051036 | -0,620900426 | 0,067798711  | -0,267317459 | NAP1L1      | sssembly psin-coding, th protein G00000187109    |
| 3535      | 0,015230623  | 0,01860031 | 0,173220103 | <b>2,7667993</b> | 3,131535833  | 0,364736518 | 0,294819 | 1,567795632  | 0,262562248  | 1,706088466  | IGL         | lobulin lamasin-coding, th protein product       |
| 833       | 0,006162063  | 0,01867198 | 0,173366087 | <b>0,5158682</b> | 9,393011114  | 8,877142868 | 0,004709 | 0,327137986  | 0,165333709  | 0,172252762  | CARS        | /l-trNA synein-coding, th protein G00000110619   |
| 6038      | 0,015658356  | 0,01871751 | 0,17365869  | <b>0,823305</b>  | 8,510614041  | 7,687309049 | 0,062035 | 0,728800585  | 0,358291729  | 0,192915143  | RNASE4      | se A familysin-coding, th protein G00000258818   |
| 54790     | 0,022502728  | 0,01872678 | 0,173484744 | <b>-0,90717</b>  | 5,592199776  | 6,499369973 | 0,098499 | -0,548249253 | 0,84431087   | -0,037495629 | TET2        | ytosine dicasin-coding, th protein G00000168769  |
| 85009     | 0,014331647  | 0,01880599 | 0,174088382 | <b>-3,533742</b> | 0,685101087  | 4,218843166 | 0,177599 | -2,318468566 | 0,429738612  | 0,38206441   |             |                                                  |
| 310       | 0,023093006  | 0,01893558 | 0,174505506 | <b>0,5642618</b> | 10,29354941  | 9,729287606 | 0,158802 | 0,22506603   | 0,124495179  | 0,252008198  | ANXA7       | annexin A7asin-coding, th protein G00000138279   |
| 116512    | 0,009726172  | 0,01899204 | 0,174635996 | <b>1,086395</b>  | 4,963070321  | 3,876675273 | 0,661884 | 0,081896113  | 0,114347186  | 0,51095999   | MRGPRD1     | GPR familasin-coding, th protein G00000172938    |
| 84191     | 0,022605121  | 0,0191034  | 0,17476232  | <b>-0,769409</b> | 10,09942537  | 10,86842576 | 0,187352 | -0,376219691 | 0,0404768    | -0,751247884 | FAM96A      | nce similasin-coding, th protein G00000166797    |
| 836       | 0,022701207  | 0,01904413 | 0,174725783 | <b>-0,794274</b> | 6,443815287  | 7,238089102 | 0,279705 | -0,596848147 | 0,755229928  | 0,056538294  | CASP3       | caspace 3asin-coding, th protein G00000164305    |
| 29925     | 0,01024099   | 0,01907014 | 0,174834967 | <b>0,7569017</b> | 9,081327192  | 8,324425461 | 0,013677 | 0,494273013  | 0,078641631  | 0,406761799  | GMPBP       | se pyrophoasin-coding, th protein G00000173540   |
| 137392    | 0,01498562   | 0,01912703 | 0,175097305 | <b>-0,535214</b> | 8,4611445    | 8,996358019 | 0,141377 | -0,2608058   | 0,54614647   | -0,103452062 | FAM92A1     | nce similasin-coding, th protein G00000188343    |
| 445328    | 0,023163418  | 0,01916697 | 0,17533338  | <b>-1,077185</b> | 7,527947872  | 8,605132991 | 0,033712 | -0,55328866  | 0,071636618  | -0,59950417  | ARHGEF35    | leotide exein-coding, th protein G00000213214    |
| 8503      | 0,017118668  | 0,01920997 | 0,175467478 | <b>0,8955837</b> | 6,172539472  | 5,276955787 | 0,380046 | -0,616579092 | 0,007952928  | 0,770205093  | PIK3R3      | 3-kinase resin-coding, th protein G00000117461   |
| 55660     | 0,008039765  | 0,01923399 | 0,17555743  | <b>-0,823082</b> | 10,22976049  | 11,05284282 | 0,09255  | -0,314662213 | 0,853378626  | -0,034987904 | PRPF40A     | essing factasin-coding, th protein G00000196504  |
| 5373      | 0,009250695  | 0,01925784 | 0,17538737  | <b>1,0354912</b> | 9,411393566  | 8,375902379 | 0,109399 | 0,462162175  | 0,019015214  | 0,458779063  | PM2M        | omannomasin-coding, th protein G00000140650      |
| 6396      | 0,020477928  | 0,01928715 | 0,175396405 | <b>0,5563931</b> | 10,67063042  | 10,11423731 | 0,653682 | 0,054550078  | 0,097645094  | 0,301855157  | SEC13       | re and COFasin-coding, th protein G00000157020   |
| 5368      | 0,02195694   | 0,019307   | 0,175448108 | <b>0,5393076</b> | 5,058136212  | 5,058828619 | 0,392595 | 0,451799066  | 0,894752891  | 0,021155446  | PNOC        | pronociceptasin-coding, th protein G00000168081  |
| 100216546 | 0,023484027  | 0,01937439 | 0,175931408 | <b>-0,662434</b> | 5,4169089    | 6,07934329  | 0,033228 | -0,351047607 | 0,350271944  | 0,152810293  | LINC010040n | -protein n-coding Rlong non-cG00000228393        |
| 6549      | 0,016706894  | 0,01937952 | 0,175849063 | <b>1,2607406</b> | 4,145260905  | 2,884520259 | 0,059431 | 0,580383827  | 0,027647488  | 0,665167333  | SLC9A2      | er family 9asin-coding, th protein G00000115616  |
| 3868      | 0,014145832  | 0,01946693 | 0,176126099 | <b>0,57953</b>   | 6,165598015  | 5,586068063 | 0,177737 | 0,332316108  | 0,799383171  | -0,05045474  | KRT16       | keratin 16asin-coding, th protein G00000186832   |
| 56950     | 0,004586459  | 0,01950424 | 0,176077775 | <b>-0,675825</b> | 8,754400602  | 9,430230887 | 0,036185 | -0,396070744 | 0,033802432  | -0,407123391 | SMYD2       | JD domain asin-coding, th protein G00000143499   |
| 57447     | 0,013494397  | 0,01952358 | 0,175995843 | <b>-0,645598</b> | 5,722167844  | 6,367766806 | 0,185221 | -0,220427294 | 0,182935681  | -0,164095503 | NDRG2       | family mersin-coding, th protein G00000165795    |
| 55319     | 0,023394147  | 0,01954183 | 0,175776559 | <b>0,5328949</b> | 9,370315425  | 8,837420526 | 0,021815 | 0,334626365  | 0,133661625  | 0,225915661  | TMA16       | nery assocasin-coding, th protein G00000198498   |
| 113675    | 0,018722347  | 0,01955215 | 0,1757418   | <b>0,5265349</b> | 8,215835507  | 7,689300558 | 0,156206 | 0,168727026  | 0,121765346  | 0,258505854  | SDSL        | dehydrataasin-coding, th protein G00000139410    |
| 3151      | 0,013321303  | 0,01955536 | 0,175643129 | <b>-0,565731</b> | 12,379219274 | 12,94494984 | 0,180004 | -1,118035233 | 0,201787179  | -0,230130427 | HMGNC       | nucleosomasin-coding, th protein G00000198830    |
| 1459      | 0,011362057  | 0,0196034  | 0,1756924   | <b>0,5440887</b> | 9,19786224   | 8,65377351  | 0,2601   | 0,101827906  | 0,507973072  | -0,08185725  | CSNK2A2     | kinase 2asin-coding, th protein G00000070770     |
| 1048      | 0,023790971  | 0,0196173  | 0,175436182 | <b>0,5010974</b> | 5,042057868  | 4,540960478 | 0,284189 | 0,59200565   | 0,931814484  | -0,037230589 | CEACAM5     | n related ein-coding, th protein G00000105388    |
| 2218      | 0,020738108  | 0,01964166 | 0,175527289 | <b>-0,703796</b> | 6,867610419  | 7,570506598 | 0,093363 | -0,43586231  | 0,410329513  | -0,153632512 | FKTN        | fukutin asin-coding, th protein G00000106692     |
| 347730    | 0,006855877  | 0,019666   | 0,17561813  | <b>0,556645</b>  | 6,101443166  | 5,544798172 | 0,561338 | 0,203541754  | 0,762934124  | 0,101695196  | LRRTM1      | t transmemasin-coding, th protein G00000162951   |
| 4653      | 0,023086727  | 0,01971892 | 0,175584315 | <b>1,5216995</b> | 3,446682016  | 1,924982565 | 0,265452 | 1,153922938  | 0,293127035  | -0,405112305 | MYOC        | myocilin asin-coding, th protein G00000034971    |
| 6183      | 0,022198466  | 0,01973907 | 0,17551137  | <b>0,5286145</b> | 8,514203148  | 7,985588654 | 0,821996 | 0,021924662  | 0,052219782  | 0,325976893  | MRPS12      | l ribosomasin-coding, th protein G00000128626    |
| 284029    | 0,018753956  | 0,01976119 | 0,175582047 | <b>0,8996187</b> | 6,48298436   | 5,583365612 | 0,009038 | 0,718855506  | 0,896082473  | 0,022846688  | LINC003240n | -protein n-coding Rlong non-cG00000178977        |
| 2115      | 0,01104063   | 0,01976806 | 0,175517106 | <b>0,6125392</b> | 7,421770794  | 6,809231581 | 0,030807 | 0,406446756  | 0,328024975  | 0,125093388  | ETV1        | TS variant asin-coding, th protein G00000006468  |
| 127833    | 0,012784638  | 0,01979738 | 0,175651554 | <b>0,6036322</b> | 6,459051595  | 5,85541936  | 0,659273 | 0,197531651  | 0,286876078  | 0,190773202  | SYT2        | laptotagmiasin-coding, th protein G00000143858   |
| 1310      | 0,007049154  | 0,01990017 | 0,176184912 | <b>0,8997939</b> | 4,493305212  | 3,593511358 | 0,415955 | 0,150253562  | 0,089259537  | 0,415492661  | COL19A1     | ype XIX alpsin-coding, th protein G00000082293   |
| 63036     | 0,02008732   | 0,01990499 | 0,176101699 | <b>0,5807456</b> | 6,108050905  | 5,527305291 | 0,028301 | 0,427412088  | 0,596279055  | -0,069658226 | CELA2A      | elastase fain-coding, th protein G00000142615    |
| 92086     | 0,006294467  | 0,01993849 | 0,17627218  | <b>1,2352077</b> | 4,558852552  | 3,323644821 | 0,791569 | -0,24111593  | 0,290731247  | 1,124246489  | GGTLC1      | yltransferasin-coding, th protein G00000149435   |
| 254170    | 0,013080147  | 0,01998877 | 0,176331145 | <b>0,6193897</b> | 8,640607771  | 8,021218035 | 0,111016 | 0,305971051  | 0,024740757  | 0,280000181  | FBX033      | ox proteinasin-coding, th protein G00000165355   |
| 202051    | 0,010741656  | 0,02000547 | 0,17636079  | <b>0,5439368</b> | 7,4793069883 | 6,935369883 | 0,11051  | 0,123385341  | 0,6998909712 | -0,046653828 | SPATA24     | genesis assasin-coding, th protein G00000170469  |
| 58189     | 0,021211224  | 0,02003526 | 0,176372399 | <b>0,7146499</b> | 5,208786246  | 4,494136352 | 0,347901 | -0,414129784 | 0,169677148  | 0,690300925  | WFDC1       | lisulfide coasin-coding, th protein G00000103175 |
| 29098     | 0,00567706   | 0,0200642  | 0,176376409 | <b>0,6098581</b> | 10,57593725  | 9,966079153 | 0,11702  | 0,21726888   | 0,417235968  | 0,116965448  | RANGRF      | nucleotide asin-coding, th protein G00000108961  |
| 401233    | 0,022093243  | 0,02009904 | 0,17643227  | <b>-0,65741</b>  | 8,360332108  | 9,017741632 | 0,205588 | -0,211480026 | 0,718630793  | 0,067458279  | HTATSF1P2f  | factor 1seudogenseudogenG00000271361             |
| 9854      | 0,004664863  | 0,02012835 | 0,1765644   | <b>0,5792587</b> | 7,554103854  | 6,974845123 | 0,005378 | 0,377349815  | 0,113011353  | 0,218216306  | C2CD2L      | C2CD2 likein-coding, th protein G00000172375     |
| 219537    | 0,011091599  | 0,02016211 | 0,176735364 | <b>0,7951577</b> | 5,95208615   | 4,606908499 | 0,346379 | 0,217231534  | 0,204953428  | 0,27253067   | SMTNL1      | oothelin likein-coding, th protein G00000214872  |
| 55536     | 0,011250463  | 0,02016599 | 0,176644379 | <b>-0,719127</b> | 8,731732198  | 9,450859622 | 0,034367 | -0,46535952  | 0,343985386  | -0,085489239 | CDC47L      | ycle assoasin-coding, th protein G00000164649    |
| 51605     | 0,024003384  | 0,02019122 | 0,176740404 | <b>0,5732383</b> | 9,367982505  | 8,794744188 | 0,023651 | 0,382148367  | 0,174770232  | 0,213188129  | TRMT6       | ethyltransasin-coding, th protein G00000089195   |
| 648691    | 0,022706813  | 0,02019264 | 0,176627995 | <b>-0,637705</b> | 5,381135915  | 6,018840799 | 0,882907 | -0,072071756 | 0,196775549  | -0,505423907 |             |                                                  |
| 644656    | 0,018842436  | 0,02019378 | 0,176388792 | <b>0,7853134</b> | 8,295849649  | 7,510536289 | 0,955118 | 0,009268647  | 0,146010893  | 0,366552468  |             |                                                  |
| 115273    | 0,004893178  | 0,02022753 | 0,176434799 | <b>-0,738851</b> | 6,626720745  | 7,365571451 | 0,886848 | -0,022222392 | 0,027054862  | 0,22984433   | RAB42       | er RAS onein-coding, th protein G00000188060     |
| 644975    | 0,023536358  | 0,02029333 | 0,176387619 | <b>0,7077278</b> | 7,277331109  | 6,569603292 | 0,209103 | 0,463567013  | 0,708009125  | 0,076492812  |             |                                                  |
| 64087     | 0,015996591  | 0,02030063 | 0,176327348 | <b>-0,63857</b>  | 7,262597412  | 7,901167808 | 0,023359 | -0,43727746  | 0,127323119  | 0,311745456  | MCCC2       | noyl-CoA esin-coding, th protein G00000131844    |

|           |             |            |             |                  |              |             |          |              |              |              |                      |                                    |                                    |                                    |
|-----------|-------------|------------|-------------|------------------|--------------|-------------|----------|--------------|--------------|--------------|----------------------|------------------------------------|------------------------------------|------------------------------------|
| 751071    | 0,015650762 | 0,0203275  | 0,176313466 | <b>0,7579277</b> | 8,005809063  | 7,247881331 | 0,041411 | 0,598739341  | 0,441013933  | 0,137808356  | METT12 transferase   | in-coding, th protein G00000214756 |                                    |                                    |
| 9245      | 0,014306313 | 0,02036265 | 0,176125    | <b>0,5051132</b> | 4,821826464  | 4,316713286 | 0,553963 | 0,396064158  | 0,340604222  | -0,533114237 | GCNT3 (styl) transfe | in-coding, th protein G00000140297 |                                    |                                    |
| 1413      | 0,008691863 | 0,02047914 | 0,176762228 | <b>0,9990251</b> | 4,183270164  | 3,184245061 | 0,305675 | 0,672527524  | 0,900098892  | 0,068327865  | CRYB4                | stallin beta                       | in-coding, th protein G00000196431 |                                    |
| 253782    | 0,01295945  | 0,02048183 | 0,176662359 | <b>-0,608407</b> | 7,682694515  | 7,682694515 | 0,049775 | -0,520676487 | 0,0490562463 | 0,23324743   | CERS6                | nide synth                         | in-coding, th protein G00000172292 |                                    |
| 23596     | 0,007592884 | 0,02050788 | 0,176763956 | <b>-0,849816</b> | 6,618518189  | 6,618518189 | 0,620293 | -0,081263444 | 0,002867465  | -0,642122486 | OPN3                 | opsin 3                            | in-coding, th protein G0000054277  |                                    |
| 57494     | 0,011731817 | 0,02052675 | 0,176557959 | <b>-0,517293</b> | 5,650283068  | 6,167576387 | 0,107676 | -0,608220565 | 0,092568287  | 0,270788394  | RIMKLB               | protein rim                        | in-coding, th protein G00000166532 |                                    |
| 7576      | 0,024308868 | 0,02054599 | 0,176600809 | <b>-1,210331</b> | 5,259392838  | 6,46972406  | 0,167156 | -0,243155783 | 0,374652377  | -0,243927566 | ZNF28                | inger protein                      | in-coding, th protein G00000198538 |                                    |
| 4338      | 0,005952847 | 0,02054865 | 0,176501197 | <b>-0,587943</b> | 9,220770014  | 9,808712755 | 0,088347 | -0,245996204 | 0,662926334  | 0,02380756   | MOC52                | m cofactor                         | in-coding, th protein G00000164172 |                                    |
| 4189      | 0,024766322 | 0,02059744 | 0,176552979 | <b>1,4255543</b> | 9,520390324  | 8,094836002 | 0,054605 | 0,960781834  | 0,294498938  | 0,376424366  | DNAJB9               | tein family                        | in-coding, th protein G00000128590 |                                    |
| 23262     | 0,009729482 | 0,02062354 | 0,176410464 | <b>-0,739001</b> | 7,907152659  | 8,646153258 | 0,046875 | -0,371038945 | 0,496619126  | -0,112656917 | PPIP5K2              | pentakisph                         | in-coding, th protein G00000145725 |                                    |
| 3884      | 0,025005509 | 0,02064423 | 0,176465555 | <b>0,7105765</b> | 5,834949352  | 5,124372802 | 0,768328 | 0,072000635  | 0,08575385   | 0,424059733  | KRT33B               | keratin 33B                        | in-coding, th protein G00000131738 |                                    |
| 285958    | 0,007112308 | 0,02078902 | 0,177336103 | <b>0,6567143</b> | 10,82107813  | 10,16436383 | 0,553889 | 0,171038275  | 0,227242879  | 0,190071878  | SNHG15               | olar RNA hn-                       | in-coding, Rlong non-cG00000232956 |                                    |
| 54863     | 0,024806974 | 0,0208672  | 0,177880492 | <b>0,5559943</b> | 8,759457019  | 8,203462678 | 0,588473 | 0,181898119  | 0,326964337  | 0,130540544  | TOR4A                | amily 4 me                         | in-coding, th protein G00000198113 |                                    |
| 6500      | 0,023938098 | 0,02089548 | 0,177999066 | <b>-1,246775</b> | 9,423293891  | 10,67006895 | 0,319906 | -0,529278346 | 0,955932361  | -0,025122474 | SKP1                 | se-associat                        | in-coding, th protein G00000113558 |                                    |
| 56652     | 0,025230817 | 0,02091991 | 0,178084621 | <b>0,5102827</b> | 7,715020012  | 7,204737345 | 0,458674 | 0,087606609  | 0,246834913  | 0,15892582   | C10orf2              | 10 open re                         | in-coding, th protein G00000107815 |                                    |
| 353141    | 0,018219316 | 0,02093971 | 0,178130789 | <b>0,9521342</b> | 5,859347008  | 4,907212768 | 0,01529  | 1,025434506  | 0,778321095  | -0,08228521  | LCE2D                | nified enve                        | in-coding, th protein G00000187223 |                                    |
| 129401    | 0,019782954 | 0,02098816 | 0,17842043  | <b>0,6927876</b> | 8,27777934   | 7,584991758 | 0,016129 | 0,276918881  | 0,033144189  | 0,385687135  | NUP35                | icleoporin                         | in-coding, th protein G00000163002 |                                    |
| 5578      | 0,017328081 | 0,02101099 | 0,178247481 | <b>0,6396873</b> | 9,01008943   | 8,370402086 | 0,09036  | 0,305416541  | 0,22507291   | 0,245900966  | PRKCA                | in kinase C                        | in-coding, th protein G00000154229 |                                    |
| 8535      | 0,024398757 | 0,0211484  | 0,179045321 | <b>0,8653781</b> | 7,412703957  | 6,547325852 | 0,007815 | 0,421570658  | 0,404374434  | 0,156441855  | CBX4                 | hromobox                           | in-coding, th protein G00000141582 |                                    |
| 10455     | 0,004857701 | 0,02120241 | 0,179135179 | <b>-0,77426</b>  | 10,68300052  | 11,45726071 | 0,072023 | -0,317949022 | 0,115382806  | -0,097855341 | ECI2                 | A delta iso                        | in-coding, th protein G00000198721 |                                    |
| 202865    | 0,022173233 | 0,02121836 | 0,17902573  | <b>0,9350351</b> | 4,08181543   | 3,146780325 | 0,223627 | 0,723665993  | 0,30424676   | 0,578505257  | C7orf33              | 7 open re                          | in-coding, th protein G00000170279 |                                    |
| 2274      | 0,008836525 | 0,02127129 | 0,17935012  | <b>0,9707414</b> | 8,849264021  | 7,878522611 | 0,257554 | 0,341408359  | 0,950187556  | -0,014285262 | FHL2                 | 3 half LIM                         | in-coding, th protein G00000115641 |                                    |
| 65083     | 0,023881192 | 0,02130039 | 0,179229445 | <b>0,5795949</b> | 8,20108189   | 7,621486894 | 0,338443 | 0,199463938  | 0,517920833  | 0,103889373  | NOL6                 | eolar prote                        | in-coding, th protein G00000165271 |                                    |
| 219347    | 0,019315026 | 0,02131538 | 0,179112282 | <b>-0,842073</b> | 4,32193115   | 5,16400368  | 0,244866 | -0,854707596 | 0,137506533  | -0,398924361 | MEM254-A54           | antisens                           | in-coding, Rlong non-cG00000230091 |                                    |
| 360       | 0,021372535 | 0,02132505 | 0,179072043 | <b>0,7629964</b> | 6,299742311  | 6,092738676 | 0,206103 | 0,456624047  | 0,101969602  | -0,422104634 | AQP3                 | 13 (Gill blo                       | in-coding, th protein G00000165272 |                                    |
| 126205    | 0,018614259 | 0,02134925 | 0,179032445 | <b>1,8077241</b> | 2,71864589   | 0,910921802 | 0,9122   | -0,158832914 | 0,403995843  | 1,195557767  | NLRP8                | rin domai                          | in-coding, th protein G00000179709 |                                    |
| 5818      | 0,007447791 | 0,02142649 | 0,179437207 | <b>0,8844969</b> | 7,949709155  | 7,065212243 | 0,086647 | 0,318012557  | 0,371841943  | 0,172810363  | TECTIN1              | adhesion re                        | in-coding, th protein G00000110400 |                                    |
| 84909     | 0,009390644 | 0,0214576  | 0,179576374 | <b>0,644439</b>  | 7,634342309  | 6,989903304 | 0,669795 | 0,116855322  | 0,900315712  | -0,020378214 | C9orf3               | 9 open re                          | in-coding, th protein G00000148120 |                                    |
| 645249    | 0,02104269  | 0,02147861 | 0,179630801 | <b>0,6966165</b> | 6,66238983   | 5,965772311 | 0,790046 | 0,049764921  | 0,215107408  | 0,260997624  | MXN1-AS1             | se RNA 1                           | (n-coding, Rlong non-cG00000243479 |                                    |
| 5567      | 0,02402144  | 0,02150091 | 0,179695938 | <b>-0,861317</b> | 6,969430167  | 7,829466351 | 0,177116 | -0,520552178 | 0,4937541    | -0,19361349  | PRKACB               | activated                          | in-coding, th protein G00000142875 |                                    |
| 79963     | 0,008593988 | 0,02151568 | 0,179698158 | <b>-0,671229</b> | 6,49660858   | 7,167837308 | 0,383506 | -0,131426283 | 0,003107112  | -0,343664507 | ABCA11P              | bfamily A                          | mseudogen                          | in-coding, th protein G00000251595 |
| 10247     | 0,019379063 | 0,02152847 | 0,179562786 | <b>-0,624329</b> | 7,842615355  | 8,466944193 | 0,486123 | -0,095790762 | 0,239772916  | -0,140867216 | RIDA                 | te imine de                        | in-coding, th protein G00000132541 |                                    |
| 6683      | 0,019766703 | 0,02173757 | 0,180804223 | <b>-0,767597</b> | 6,478984815  | 7,246581352 | 0,156374 | -0,589382135 | 0,149437254  | -0,248597922 | SPAST                | spastin                            | in-coding, th protein G0000021574  |                                    |
| 8445      | 0,017264243 | 0,02174866 | 0,180427328 | <b>0,6365829</b> | 8,210311764  | 7,573728831 | 0,002315 | 0,752231878  | 0,959986878  | -0,007898098 | DYRK2                | phosphory                          | in-coding, th protein G00000127334 |                                    |
| 162963    | 0,022448851 | 0,02176639 | 0,180453605 | <b>-0,555806</b> | 4,966587552  | 5,522393941 | 0,735705 | 0,021736518  | 0,634856737  | -0,068337578 | ZNF610               | nger prote                         | in-coding, th protein G00000167554 |                                    |
| 56265     | 0,006270414 | 0,02179398 | 0,180561479 | <b>0,5505595</b> | 5,667549489  | 5,116990007 | 0,150978 | 0,488077876  | 0,959320028  | 0,006246086  | CPXM1                | ie X, M14                          | in-coding, th protein G00000088882 |                                    |
| 6776      | 0,02595805  | 0,02182167 | 0,180549349 | <b>-2,012649</b> | 5,553543097  | 7,567991809 | 0,443054 | -0,264606812 | 0,284236414  | -0,607225382 | PSG7                 | ly-glycop                          | in-coding, th protein G00000221878 |                                    |
| 6772      | 0,006032624 | 0,02205816 | 0,181174695 | <b>-0,612027</b> | 8,146640044  | 8,758667122 | 0,443862 | -0,09981316  | 0,028766104  | -0,49096217  | STAT1                | nd activat                         | in-coding, th protein G00000115415 |                                    |
| 55012     | 0,007972764 | 0,02206912 | 0,181144672 | <b>0,6884143</b> | 9,907611668  | 9,219197408 | 0,066713 | 0,230157207  | 0,245427     | 0,196587582  | PPP2R3C              | 2 regulato                         | in-coding, th protein G00000092020 |                                    |
| 89894     | 0,020946889 | 0,02213419 | 0,181198409 | <b>-0,618255</b> | 6,849995597  | 7,468250291 | 0,953079 | 0,007852286  | 0,966340349  | -0,00621246  | TMEM116              | mbrane pr                          | in-coding, th protein G00000198270 |                                    |
| 1499      | 0,017252497 | 0,02226584 | 0,182035498 | <b>0,9348765</b> | 10,630835732 | 9,673480775 | 0,045131 | 0,450026235  | 0,474878912  | 0,168239267  | CTNNB1               | tenin beta                         | in-coding, th protein G00000168036 |                                    |
| 152789    | 0,013321118 | 0,02227292 | 0,182024637 | <b>0,6845521</b> | 3,849722035  | 3,165169912 | 0,469602 | 0,23726166   | 0,055440123  | 0,586736749  | JAKMIP1              | rotubule                           | in-coding, th protein G00000152969 |                                    |
| 259       | 0,012935391 | 0,02228297 | 0,181935359 | <b>0,6879264</b> | 5,294727819  | 4,606801443 | 0,597618 | 0,159588313  | 0,361397773  | 0,288899149  | AMBP                 | lobulin/bi                         | in-coding, th protein G00000106927 |                                    |
| 912       | 0,00479068  | 0,02233865 | 0,182149886 | <b>1,9103273</b> | 4,065996413  | 2,155669139 | 0,177362 | 1,189765804  | 0,791743017  | 0,188318651  | CD1D                 | 11d molecu                         | in-coding, th protein G00000158473 |                                    |
| 5651      | 0,023094214 | 0,02240424 | 0,182564456 | <b>1,4500227</b> | 1,867388639  | 0,417365896 | 0,082359 | 1,671452149  | 0,79079347   | 0,181922433  | TMPPRS15             | ane prote                          | in-coding, th protein G00000154646 |                                    |
| 389123    | 0,020573524 | 0,02241705 | 0,182548796 | <b>1,0339074</b> | 3,495635212  | 2,46172785  | 0,230217 | 1,340427808  | 0,384701022  | -0,877657932 | IQCF2                | atif contain                       | in-coding, th protein G00000184345 |                                    |
| 85025     | 0,008028975 | 0,02244683 | 0,182551234 | <b>-0,681085</b> | 8,1445499503 | 8,25684307  | 0,172595 | -0,259987121 | 0,024626003  | 0,237477238  | TMEM60               | mbrane pr                          | in-coding, th protein G00000135211 |                                    |
| 9240      | 0,011358114 | 0,02245889 | 0,182529468 | <b>0,753571</b>  | 9,807707025  | 9,054135989 | 0,508938 | 0,156762816  | 0,07908072   | 0,426471027  | PNMA1                | lastic Ma                          | in-coding, th protein G00000176903 |                                    |
| 100528007 | 0,005461564 | 0,02245938 | 0,182413753 | <b>-0,55423</b>  | 5,599238664  | 6,153454339 | 0,227695 | -0,24127124  | 0,528446035  | -0,073578652 | JRC57-AS             | Madthrough                         | other eadth                        | in-coding, th protein G00000270316 |
| 284293    | 0,023730923 | 0,0224607  | 0,182304908 | <b>0,5711292</b> | 8,647084277  | 8,075955064 | 0,048444 | 0,257500716  | 0,33260443   | -0,126449681 | HMSD                 | inor serpi                         | in-coding, th protein G00000221887 |                                    |
| 160140    | 0,00561259  | 0,02256201 | 0,1827679   | <b>-0,967316</b> | 3,91424612   | 4,881562002 | 0,065859 | -0,335643296 | 0,568393793  | 0,049508394  | C11orf65             | 11 open re                         | in-coding, th protein G00000166323 |                                    |
| 448834    | 0,006159214 | 0,02257118 | 0,182727246 | <b>2,388912</b>  | 3,815373525  | 1,426461477 | 0,063284 | 2,045228566  | 0,797499235  | 0,177720447  | KRP                  | te proline                         | in-coding, th protein G00000203786 |                                    |
| 279       | 0,025196241 | 0,02257125 | 0,182603956 | <b>-0,848799</b> | 5,048876554  | 5,897675517 | 0,037546 | -0,515759957 | 0,445456361  | -0,186450222 | AMY2A                | alpha 2A                           | (p                                 | in-coding, th protein G00000243480 |
| 11146     | 0,020227043 | 0,02261512 | 0,182601018 | <b>-0,598594</b> | 7,85462903   | 8,453222993 | 0,021795 | -0,479414862 | 0,474111262  | -0,093773072 | GLMN                 | <BP assoc                          | in-coding, th protein G00000174842 |                                    |
| 116984    | 0,026833447 | 0,02266291 | 0,182748652 | <b>-0,85678</b>  | 4,638996272  | 5,495776412 | 0,057564 | -0,656204124 | 0,659895478  | 0,103321647  | ARAP2                | ain, ankyr                         | in-coding, th protein G00000047365 |                                    |
| 497258    | 0,015097052 | 0,02267432 | 0,18260286  | <b>-1,212068</b> | 3,857796956  | 5,069865407 | 0,242513 | -0,68252326  | 0,690837633  | -0,063074352 | BDNF-AS              | antisens                           | in-coding, Rlong non-cG00000245573 |                                    |
| 23240     | 0,025749571 | 0,02268058 | 0,182534575 | <b>-0,776237</b> | 6,181816016  | 6,958052771 | 0,107381 | -0,369542146 | 0,89361448   | -0,021016051 | KIAA0922             | KIAA0922                           | in-coding, th protein G00000121210 |                                    |
| 134701    | 0,005565536 | 0,02272366 | 0,182525485 | <b>0,6245704</b> | 5,129999257  | 4,950428891 | 0,043099 | 0,846214345  | 0,610641595  | -0,039887017 | RIPPLY2              | criptional                         | in-coding, th protein G00000203877 |                                    |
| 284071    | 0,01751242  | 0,02272475 | 0,182415947 | <b>0,8439296</b> | 4,785914372  |             |          |              |              |              |                      |                                    |                                    |                                    |



|           |             |            |             |           |             |             |          |              |             |              |                |                                                 |
|-----------|-------------|------------|-------------|-----------|-------------|-------------|----------|--------------|-------------|--------------|----------------|-------------------------------------------------|
| 140690    | 0,015840643 | 0,02273176 | 0,182236004 | 0,5732587 | 5,674945013 | 5,101686331 | 0,280073 | 0,399549606  | 0,886683228 | -0,044647153 | CTCFL          | binding facin-coding, th protein G00000124092   |
| 7334      | 0,012114905 | 0,02273353 | 0,182132364 | 0,5708628 | 9,014224697 | 8,443361923 | 0,279093 | 0,123068244  | 0,048541668 | 0,399949174  | UBE2N          | njugating ein-coding, th protein G00000177889   |
| 146513    | 0,004902552 | 0,02277854 | 0,182022026 | -3,3262   | 0           | 3,326200381 | 0,1841   | -2,369701646 | 0,518066048 | -0,956498735 |                |                                                 |
| 10384     | 0,024997369 | 0,02277982 | 0,181914887 | -0,662367 | 7,080064475 | 7,742431357 | 0,530409 | -0,197639864 | 0,092243939 | -0,393464629 | BTN3A3         | subfamily ain-coding, th protein G00000111801   |
| 644852    | 0,016810293 | 0,0228222  | 0,182018594 | 0,8948424 | 2,757471684 | 1,862629329 | 0,261403 | 0,793061257  | 0,068355465 | 0,306897963  |                |                                                 |
| 22977     | 0,014413516 | 0,02285199 | 0,182138934 | -0,831633 | 7,5675388   | 8,399172197 | 0,078285 | -0,595608982 | 0,64620338  | -0,055114665 | AKR7A3         | ctase familain-coding, th protein G00000162482  |
| 84288     | 0,023057087 | 0,0229282  | 0,182394207 | 0,546188  | 6,220371319 | 5,674183296 | 0,457677 | -0,29651413  | 0,037478884 | 0,4759878    | EFCAB2         | cium bindiain-coding, th protein G00000203666   |
| 1152      | 0,023098735 | 0,02294821 | 0,182319227 | 0,710959  | 8,757063367 | 8,046104365 | 0,401567 | 0,251930464  | 0,105688686 | 0,398808882  | CKB            | atine kinasain-coding, th protein G00000166165  |
| 401250    | 0,023120316 | 0,02298871 | 0,18252388  | 0,5197349 | 6,694665537 | 6,17493064  | 0,068303 | 0,639364686  | 0,233230011 | -0,185083991 | MCCD1          | ial coiled-cein-coding, th protein G00000204511 |
| 389860    | 0,010857747 | 0,02307109 | 0,182826395 | -1,859938 | 3,722787898 | 5,582725989 | 0,649278 | -0,139120411 | 0,186794431 | -0,427717902 | PAGE2B         | amily memrain-coding, th protein G00000238269   |
| 129607    | 0,019386187 | 0,02310516 | 0,182862393 | 0,747104  | 4,752734861 | 4,005630837 | 0,642426 | 0,427664319  | 0,631068352 | 0,231201305  | CMPK2          | monophosain-coding, th protein G00000134326     |
| 387712    | 0,013513514 | 0,0231086  | 0,182772822 | -0,77277  | 4,103476767 | 4,87624695  | 0,084735 | -0,387891944 | 0,019046352 | -0,441925463 | ENO4           | family meain-coding, th protein G00000188316    |
| 79981     | 0,025515764 | 0,02317704 | 0,182730647 | 0,7286974 | 5,197258759 | 4,68561355  | 0,092673 | 0,404704718  | 0,67683417  | 0,072302101  | FRMD1          | omain contain-coding, th protein G00000153303   |
| 388963    | 0,01455161  | 0,02322252 | 0,182740287 | 0,5459407 | 7,531526092 | 6,985585359 | 0,305174 | 0,261716555  | 0,10690382  | -0,301409832 | C2orf81        | 2 open reain-coding, th protein G00000159239    |
| 28597     | 0,023094661 | 0,02324026 | 0,18264778  | 0,6043851 | 4,968702182 | 4,364317065 | 0,45274  | 0,339768119  | 0,669709025 | -0,181086935 | C16orf54       | L6 open reain-coding, th protein G00000185905   |
| 54534     | 0,00513493  | 0,02326134 | 0,182697567 | 0,6289556 | 11,06336316 | 10,43440755 | 0,022633 | 0,414208145  | 0,193560732 | 0,167812885  | MRPL50         | l ribosomain-coding, th protein G00000136897    |
| 51109     | 0,0179677   | 0,02332515 | 0,1829667   | 1,1301469 | 10,02259276 | 8,8924459   | 0,002093 | 0,808578948  | 0,14001032  | 0,545376718  | RDH11          | ase 11 (all)ain-coding, th protein G00000072042 |
| 913       | 0,015639562 | 0,02335926 | 0,183002428 | 0,5035383 | 5,437656094 | 4,934117771 | 0,261112 | 0,300245964  | 0,348959869 | -0,105170759 | CD1E           | 21e molecain-coding, th protein G00000158488    |
| 79084     | 0,020364803 | 0,02336117 | 0,182901702 | 0,5439764 | 8,976947825 | 9,520924227 | 0,138026 | 0,135495746  | 0,110735736 | 0,293392204  | WDR77          | peat domain-coding, th protein G00000116455     |
| 339291    | 0,026426559 | 0,02336467 | 0,182813582 | 0,6708472 | 6,966416589 | 6,295569406 | 0,024574 | 0,849612976  | 0,691922115 | 0,076931748  | LRR30          | repeat coain-coding, th protein G00000206422    |
| 6777      | 0,018451039 | 0,02338784 | 0,182879329 | 0,6149757 | 8,235910846 | 7,620935177 | 0,512385 | 0,126899814  | 0,146430268 | 0,283492213  | STAT5B         | id activatoin-coding, th protein G00000173757   |
| 148738    | 0,008086509 | 0,02343711 | 0,183033488 | 1,0364335 | 4,961823688 | 3,925390175 | 0,232587 | 0,518708485  | 0,478287527 | 0,269281432  | HFE2           | atosis typain-coding, th protein G00000168509   |
| 333926    | 0,015866793 | 0,02344677 | 0,182993568 | -0,557146 | 6,091368682 | 6,648514437 | 0,124896 | -0,257022352 | 0,104168085 | -0,310518725 | PPM1J          | se, Mg2+/hain-coding, th protein G00000155367   |
| 3620      | 0,016314825 | 0,02354963 | 0,183680564 | -1,544109 | 2,792270938 | 4,336379817 | 0,196661 | -1,982988121 | 0,084288359 | -0,484383021 | IDO1           | ne 2,3-dioxain-coding, th protein G00000131203  |
| 63901     | 0,022115906 | 0,02384894 | 0,184851087 | -0,746773 | 5,897238704 | 6,640111345 | 0,02339  | -0,591598985 | 0,348134583 | 0,199864408  | FAM111A        | nce similarain-coding, th protein G00000166801  |
| 125476    | 0,017185326 | 0,0238829  | 0,184882897 | 0,687737  | 10,28603366 | 9,598296698 | 0,082213 | 0,415781576  | 0,174612626 | 0,178886785  | INO80C         | complex suain-coding, th protein G00000153391   |
| 90167     | 0,028113029 | 0,02390336 | 0,184925721 | 1,788185  | 2,93466031  | 1,146475359 | 0,115738 | 1,578396639  | 0,893330256 | 0,105532475  | FRMD7          | omain contain-coding, th protein G00000165694   |
| 11221     | 0,018931207 | 0,02394301 | 0,185116829 | -0,582    | 8,720487508 | 9,302487548 | 0,264671 | 0,156309597  | 0,019407802 | -0,611143523 | DUSP10         | ficity phosain-coding, th protein G00000143507  |
| 28978     | 0,015745055 | 0,02394842 | 0,184927775 | -0,73324  | 9,85462924  | 10,58786954 | 0,000133 | -0,433881984 | 0,220807354 | -0,125692686 | TMEM14A        | nbrane prein-coding, th protein G0000090692     |
| 100131454 | 0,026688638 | 0,02395233 | 0,184842758 | -1,621627 | 3,668435577 | 5,290062774 | 0,287036 | -1,920295894 | 0,967948314 | 0,015929648  | DBIL5P         | inhibitor-lisueudogenosudogenG00000231784       |
| 1040      | 0,021480132 | 0,02405487 | 0,185518482 | -0,894251 | 5,585732153 | 6,479982825 | 0,515197 | -0,346607294 | 0,055076351 | -0,709282682 | CD51           | /glycerol sain-coding, th protein G00000163624  |
| 9496      | 0,021959604 | 0,02405897 | 0,1854346   | 0,5366319 | 5,268270725 | 4,731638824 | 0,295493 | 0,206782856  | 0,654857889 | 0,063646098  | TBX4           | T-box 4 ain-coding, th protein G00000121075     |
| 25849     | 0,013305911 | 0,02410556 | 0,185678155 | 0,8456472 | 5,928495099 | 5,083811902 | 0,502554 | 0,125172791  | 0,029737947 | 0,301422931  | PARM1          | regulated rain-coding, th protein G00000169116  |
| 81553     | 0,020470416 | 0,02416173 | 0,185879648 | -0,581133 | 4,556702563 | 5,137835587 | 0,782168 | -0,054036865 | 0,597070554 | -0,089622891 | FAM49A         | nce similarain-coding, th protein G00000197872  |
| 23285     | 0,028160582 | 0,02416428 | 0,185783887 | -0,880547 | 5,463136779 | 6,343684004 | 0,471433 | -0,188571967 | 0,266796453 | -0,328001936 | KIAA1107       | KIAA1107 ain-coding, th protein G00000069712    |
| 4103      | 0,026916829 | 0,02417379 | 0,185741728 | 1,948711  | 3,558741569 | 1,610030543 | 0,388185 | 1,090541727  | 0,92841888  | -0,057895971 | MAGEA4         | family memrain-coding, th protein G00000147381  |
| 441733    | 0,00599062  | 0,02418142 | 0,185570072 | -1,224862 | 6,359644069 | 7,584505701 | 0,004316 | -1,072312185 | 0,090164999 | 0,318102342  | PRKXP1         | , X-linked, useudogenosudogenG00000259205       |
| 9455      | 0,027500942 | 0,02421671 | 0,185725838 | -0,551988 | 5,584443173 | 6,136431388 | 0,051697 | -0,481670346 | 0,990036137 | 0,002284803  | HOMER2         | caffolding ain-coding, th protein G00000103942  |
| 221424    | 0,028435078 | 0,024244   | 0,185820045 | 0,6929374 | 6,782094649 | 6,089157292 | 0,130249 | 0,361574877  | 0,237677843 | 0,26467949   | LRR37          | repeat coain-coding, th protein G00000204052    |
| 55742     | 0,011676774 | 0,0242459  | 0,185719715 | -0,6216   | 8,774024833 | 9,395624977 | 0,381767 | -0,205872743 | 0,276288884 | 0,138089543  | PARVA          | arvin alphain-coding, th protein G00000197702   |
| 29947     | 0,028465176 | 0,02426002 | 0,185598328 | -0,691659 | 5,030480931 | 5,722139837 | 0,898325 | 0,049184175  | 0,225629874 | -0,259794951 | DNMT3L         | hyltransferain-coding, th protein G00000142182  |
| 90673     | 0,028470368 | 0,02438827 | 0,186119662 | -0,884846 | 6,18513139  | 7,069976928 | 0,13824  | -0,744851457 | 0,573622923 | -0,125886585 | PPP1R3E        | tase 1 reguain-coding, th protein G00000235194  |
| 23400     | 0,005967316 | 0,02441459 | 0,186205753 | -0,71352  | 7,472039171 | 8,185559384 | 0,534901 | -0,120068602 | 0,949444443 | 0,009620794  | ATP13A2        | (TPase 13A)ain-coding, th protein G00000159363  |
| 171220    | 0,021542572 | 0,02442378 | 0,186161252 | 0,6598425 | 13,76713662 | 13,10729415 | 0,116006 | 0,489595472  | 0,492521999 | -0,107792524 | DSTNP2         | ymerizing fseudogenosudogenG00000248593         |
| 4207      | 0,011780306 | 0,02448234 | 0,186263676 | 0,7075427 | 8,739596231 | 8,032035354 | 0,045951 | 0,334706842  | 0,252046396 | 0,223199832  | IRCS8-MEFMEF2B | rea other eadthrougG0000064489                  |
| 219972    | 0,006529432 | 0,02450183 | 0,186297567 | 1,5682899 | 4,100913712 | 2,5326239   | 0,733141 | 0,194620674  | 0,28731361  | 0,673579627  | MPEG1          | hage expreain-coding, th protein G00000197629   |
| 10611     | 0,005638533 | 0,02450269 | 0,186189812 | 0,7553379 | 10,05678404 | 9,301466118 | 0,018467 | 0,376905464  | 0,194105511 | -0,231167922 | PDLIM5         | nd LIM dorain-coding, th protein G00000163110   |
| 5999      | 0,010037331 | 0,02453601 | 0,186328698 | 1,028811  | 7,849905039 | 6,821093994 | 0,303363 | 0,200967981  | 0,262247118 | -0,127948541 | RG54           | f G-proteain-coding, th protein G00000117152    |
| 158401    | 0,018703647 | 0,02454506 | 0,186283181 | -1,49487  | 2,91824865  | 4,413118915 | 0,565215 | -0,415275614 | 0,039690773 | -1,452164203 | C9orf84        | 9 open reain-coding, th protein G00000165181    |
| 22864     | 0,02054738  | 0,02455371 | 0,186234693 | -0,509681 | 7,376088353 | 7,885769387 | 0,02598  | -0,275315047 | 0,198724577 | -0,136504637 | R3HDM2         | main contain-coding, th protein G00000179912    |
| 5226      | 0,015151866 | 0,02460511 | 0,186396258 | -0,651111 | 9,781821429 | 10,43292341 | 0,019692 | -0,406916797 | 0,88254163  | 0,015106464  | PGD            | conate defain-coding, th protein G00000142657   |
| 55830     | 0,020045955 | 0,02468015 | 0,186736359 | -0,5481   | 7,913536843 | 8,461636741 | 0,05821  | -0,336483436 | 0,223337298 | 0,219152958  | GLT8D1         | ase 8 domain-coding, th protein G00000016864    |
| 84918     | 0,025949775 | 0,02468599 | 0,186666492 | -0,602703 | 6,741855846 | 7,344558929 | 0,758259 | -0,046752136 | 0,527240957 | -0,085787311 | LRP11          | or related ain-coding, th protein G00000120256  |
| 133746    | 0,024909977 | 0,02472267 | 0,186602097 | 0,6323144 | 7,945418796 | 7,313104428 | 0,389401 | 0,302046951  | 0,694202178 | 0,07989073   | JMY            | regulatorain-coding, th protein G00000152409    |
| 9928      | 0,027591412 | 0,02474093 | 0,186626188 | 0,5575449 | 8,239936284 | 7,682793151 | 0,722407 | 0,062786965  | 0,021200762 | 0,47793985   | KIF14          | family merain-coding, th protein G00000118193   |
| 55207     | 0,028773542 | 0,02475356 | 0,186607779 | 0,6385366 | 10,40858803 | 9,770051417 | 0,066135 | 0,23656334   | 0,037034017 | 0,508750091  | ARL8B          | ion factor lain-coding, th protein G00000134108 |
| 6383      | 0,014019063 | 0,02482896 | 0,186835047 | 1,0666238 | 7,775712492 | 6,709088669 | 0,098087 | 0,687715226  | 0,653175056 | 0,136451466  | SDC2           | syndecan 2ain-coding, th protein G00000169439   |
| 7278      | 0,029071701 | 0,02490035 | 0,18691805  | -0,697272 | 4,001969244 | 6,989868048 | 0,985961 | 0,010311332  | 0,703944024 | -0,200749334 | TUBA3C         | ulin alphaain-coding, th protein G00000198033   |
| 7053      | 0,028709033 | 0,0249307  | 0,187032542 | 0,6915302 | 5,625286525 | 4,933756296 | 0,677068 | 0,113231486  | 0,273945572 | 0,253705456  | TGM3           | sglutaminain-coding, th protein G00000125780    |

|           |             |            |             |                  |             |             |          |              |             |              |                                                         |
|-----------|-------------|------------|-------------|------------------|-------------|-------------|----------|--------------|-------------|--------------|---------------------------------------------------------|
| 399904    | 0,026794425 | 0,02493467 | 0,186949087 | <b>0,7647663</b> | 4,352712511 | 3,587946197 | 0,268886 | -0,763547665 | 0,167480996 | 0,63857335   |                                                         |
| 3108      | 0,009119679 | 0,02493752 | 0,186857345 | <b>-0,636201</b> | 10,7491108  | 11,38531172 | 0,055505 | -0,241233707 | 0,201183535 | -0,563405911 | HLA-DMA5 ility complein-coding ,th protein G00000204257 |
| 149351    | 0,020484855 | 0,02497448 | 0,187021152 | <b>-0,82832</b>  | 6,06588247  | 6,894202373 | 0,109392 | -0,846967743 | 0,068494796 | 0,714754559  |                                                         |
| 4214      | 0,007909013 | 0,02500119 | 0,186882183 | <b>-0,990891</b> | 6,614676053 | 7,605566865 | 0,004056 | -0,571708641 | 0,107041115 | -0,464755085 | MAP3K1 protein kinin-coding ,th protein G00000095015    |
| 54477     | 0,010258214 | 0,02505001 | 0,18702135  | <b>-0,555217</b> | 7,703975102 | 8,259191856 | 0,172614 | -0,471919938 | 0,028564465 | -0,182631368 | PLEKHA5 logy domain-coding ,th protein G0000052126      |
| 3077      | 0,008650388 | 0,02519915 | 0,187795235 | <b>-0,844918</b> | 6,756874368 | 7,601792617 | 0,064933 | -0,285899167 | 0,042455845 | -0,575718899 | HFE ochromatin-coding ,th protein G00000010704          |
| 7905      | 0,009886942 | 0,02521887 | 0,187829159 | <b>-0,514191</b> | 11,88591323 | 12,40010382 | 0,429089 | -0,113288688 | 0,190182099 | -0,233831257 | REEP5 accessory ain-coding ,th protein G00000129625     |
| 56344     | 0,021335639 | 0,02529255 | 0,188151702 | <b>2,8045231</b> | 3,167740605 | 3,632217459 | 0,921729 | 0,12106773   | 0,264073238 | 1,203852459  | CABP5 i binding pein-coding ,th protein G00000105507    |
| 54765     | 0,009121853 | 0,02529348 | 0,188045643 | <b>-0,584049</b> | 9,798036318 | 10,38208524 | 0,026185 | -0,375005635 | 0,096837901 | 0,165712893  | TRIM44 motif contain-coding ,th protein G00000166326    |
| 729879    | 0,026467248 | 0,02533288 | 0,188112771 | <b>0,8529898</b> | 5,127805521 | 4,274815693 | 0,034517 | 0,751107023  | 0,334528471 | 0,251263528  |                                                         |
| 727738    | 0,028500496 | 0,02554305 | 0,188880718 | <b>0,6005997</b> | 10,71350684 | 10,11290711 | 0,108723 | 0,798101255  | 0,401371128 | -0,268418758 |                                                         |
| 54474     | 0,016683793 | 0,02558778 | 0,188985842 | <b>0,5229892</b> | 4,033764088 | 3,510774843 | 0,005748 | 1,196800909  | 0,315652    | -0,21271188  | KRT20 keratin 20ain-coding ,th protein G00000171431     |
| 26530     | 0,025836737 | 0,02559612 | 0,188934765 | <b>-0,731082</b> | 9,108769652 | 9,839851574 | 0,02192  | -0,199722246 | 0,15506799  | -0,352669302 | SLC17A5 er family 1ain-coding ,th protein G00000119899  |
| 653857    | 0,012090324 | 0,02561362 | 0,188838888 | <b>-0,637997</b> | 8,527146405 | 9,16514373  | 0,039087 | -0,388523309 | 0,444833581 | -0,128862806 | ACTR3C ated proteain-coding ,th protein G00000106526    |
| 55814     | 0,010061642 | 0,02562129 | 0,188783016 | <b>-0,612992</b> | 7,692207745 | 8,305200027 | 0,141152 | -0,447618257 | 0,29326326  | -0,164832437 | BDP1 olymerase ain-coding ,th protein G00000145734      |
| 257194    | 0,021578497 | 0,02568733 | 0,188932428 | <b>0,5962505</b> | 6,792682191 | 6,1965757   | 0,36465  | 0,270471592  | 0,71515718  | -0,059425779 | NEGR1 l growth reain-coding ,th protein G00000172260    |
| 4175      | 0,01813791  | 0,02579233 | 0,1892552   | <b>-0,70696</b>  | 8,571069287 | 9,278029162 | 0,038803 | -0,360040018 | 0,70417479  | -0,048897157 | MCM6 intenance ein-coding ,th protein G00000076003      |
| 7879      | 0,010380752 | 0,02580244 | 0,189217268 | <b>-0,74372</b>  | 10,48379377 | 11,22751402 | 0,049991 | -0,374111488 | 0,545562644 | 0,105992992  | RAB7A 3er RAS onain-coding ,th protein G00000075785     |
| 54097     | 0,025067869 | 0,02587152 | 0,189499451 | <b>0,5703797</b> | 5,431397048 | 4,86101735  | 0,159658 | 0,599572579  | 0,88430794  | -0,049553247 | FAM3B ence similain-coding ,th protein G00000183844     |
| 652       | 0,017029641 | 0,02589182 | 0,189536075 | <b>-0,715318</b> | 10,27224784 | 10,98756579 | 0,243994 | -0,10838004  | 0,00214391  | -0,686401344 | BMP4 phogeneticin-coding ,th protein G00000125378       |
| 3460      | 0,027243663 | 0,0259275  | 0,189573193 | <b>-0,783133</b> | 8,274105185 | 9,057238059 | 0,169961 | -0,182741506 | 0,111711937 | -0,43773375  | IFNGR2 r 2 (interfein-coding ,th protein G00000159128   |
| 171568    | 0,015087606 | 0,02596319 | 0,189722159 | <b>0,6797085</b> | 9,539674009 | 8,859965484 | 0,886007 | 0,017358379  | 0,802205647 | -0,042057919 | POLR3H merase III ain-coding ,th protein G00000100413   |
| 84645     | 0,018573444 | 0,02597572 | 0,189701786 | <b>-0,663441</b> | 4,642589079 | 5,306030056 | 0,062779 | -1,346839825 | 0,911060265 | 0,02354662   | C22orf23 2 open reain-coding ,th protein G00000128346   |
| 339263    | 0,00847374  | 0,02609673 | 0,190025338 | <b>0,5847325</b> | 9,567018419 | 8,982285931 | 0,164925 | 0,219997823  | 0,027998264 | 0,50637927   | C17orf15 17 open reain-coding ,th protein G00000212719  |
| 730098    | 0,02612691  | 0,0261398  | 0,190115382 | <b>0,8026531</b> | 8,240500171 | 7,43784703  | 0,182929 | 0,239926966  | 0,909043599 | 0,026528533  |                                                         |
| 8516      | 0,014206103 | 0,02617748 | 0,190166121 | <b>1,6478344</b> | 1,984481482 | 3,36647077  | 0,002362 | 1,961148969  | 0,771817861 | -0,124963436 | ITGA8 n subunit ain-coding ,th protein G00000077943     |
| 705       | 0,012149108 | 0,02626803 | 0,190488778 | <b>0,7547729</b> | 10,51952914 | 9,764756228 | 0,091423 | 0,232126962  | 0,233644541 | 0,248629739  | BSYL bystin like ain-coding ,th protein G00000112578    |
| 8334      | 0,027958472 | 0,0264158  | 0,191112745 | <b>-0,776013</b> | 8,040517247 | 8,816530137 | 0,536803 | -0,272683025 | 0,125683807 | -0,448866417 | HIST1H2ACr 1 H2A farain-coding ,th protein G00000180573 |
| 100128252 | 0,026742351 | 0,02644225 | 0,191080924 | <b>1,531298</b>  | 4,776841725 | 3,245543767 | 0,036776 | 1,009636739  | 0,087831024 | 0,986302095  | 2NF667-ASense RNA 1 n-coding Rlong non-cG00000166770    |
| 11034     | 0,020150658 | 0,02645974 | 0,191095786 | <b>0,680191</b>  | 13,11855417 | 12,43836313 | 0,346877 | 0,308253386  | 0,645593112 | -0,099623615 | DNST nopolymerin-coding ,th protein G00000125868        |
| 254187    | 0,027292497 | 0,02651322 | 0,191258972 | <b>0,6968728</b> | 6,05677786  | 5,359905055 | 0,260395 | 0,387395557  | 0,829862144 | 0,04054978   | TSGA10IP c 10 interain-coding ,th protein G00000175513  |
| 5865      | 0,026669081 | 0,0265165  | 0,191171335 | <b>0,6095316</b> | 5,896681671 | 5,287150028 | 0,263631 | 0,328060706  | 0,37665233  | 0,113318541  | RAB3B 3er RAS onain-coding ,th protein G00000169213     |
| 100131897 | 0,01072024  | 0,02651938 | 0,191080876 | <b>0,965038</b>  | 5,197404702 | 4,235666663 | 0,248497 | 0,501456591  | 0,55679273  | -0,213096406 | FAM196B nce similairin-coding ,th protein G00000204767  |
| 9630      | 0,014629757 | 0,02652618 | 0,191018747 | <b>1,1710504</b> | 4,285374508 | 3,114324123 | 0,025622 | 0,637718604  | 0,876428595 | 0,045053372  | GNA14 in subunit ain-coding ,th protein G00000156049    |
| 56849     | 0,011687108 | 0,02652849 | 0,190924384 | <b>0,5173661</b> | 6,184596468 | 5,66723038  | 0,481943 | 0,2566827    | 0,748512413 | 0,110337954  | TCEAL7 elongation ain-coding ,th protein G00000182916   |
| 51293     | 0,014125402 | 0,02655105 | 0,190975747 | <b>0,5357306</b> | 11,46177627 | 10,92604568 | 0,231798 | -0,288200045 | 0,02997722  | 0,598693893  | CD320 320 molecain-coding ,th protein G00000167775      |
| 4100      | 0,030194085 | 0,02661262 | 0,191307506 | <b>0,8641941</b> | 5,068048629 | 4,203854538 | 0,106436 | 0,957784102  | 0,985943816 | -0,007820105 | MAGEA1 family mernin-coding ,th protein G00000198681    |
| 10553     | 0,028539172 | 0,02662087 | 0,191255842 | <b>-0,660297</b> | 8,700144915 | 9,360441941 | 0,399715 | -0,215112621 | 0,798716121 | -0,054672992 | HTATIP2 interactivein-coding ,th protein G00000109854   |
| 10215     | 0,029457407 | 0,02666959 | 0,191383852 | <b>2,3048334</b> | 2,727551561 | 0,42271813  | 0,004717 | 3,118075375  | 0,422649731 | -0,42271813  | OLIG2 ineage trrain-coding ,th protein G00000205927     |
| 112479    | 0,025770663 | 0,02667472 | 0,191309806 | <b>-0,806321</b> | 4,863166815 | 5,66948804  | 0,054994 | -1,21816232  | 0,327802125 | 0,235361893  | ER12 uclease farain-coding ,th protein G00000196678     |
| 57590     | 0,02920778  | 0,02672509 | 0,191338689 | <b>-0,616272</b> | 7,774287799 | 8,390559846 | 0,040452 | -0,326851153 | 0,086522231 | -0,433907763 | WDFY1 FYVE domain-coding ,th protein G00000085449       |
| 729658    | 0,018298232 | 0,02675209 | 0,191421357 | <b>1,3876004</b> | 4,594658263 | 3,207057878 | 0,006353 | 1,207137878  | 0,973090337 | -0,012493504 | PACRG-AS3 antisensein-coding Rlong non-cG00000225683    |
| 5189      | 0,02082392  | 0,02678898 | 0,191574636 | <b>-0,617636</b> | 6,570401838 | 7,188038117 | 0,311266 | -0,362869541 | 0,734324601 | 0,032288968  | PEX1 al biogenein-coding ,th protein G00000127980       |
| 88455     | 0,008903026 | 0,02681921 | 0,191680118 | <b>0,6086465</b> | 8,204747805 | 7,596101274 | 0,13521  | 0,306898158  | 0,28153531  | -0,218033575 | ANKRD13Arepeat domain-coding ,th protein G00000076513   |
| 6536      | 0,009866594 | 0,0268281  | 0,191633126 | <b>0,5722393</b> | 7,717657956 | 7,145418631 | 0,038045 | 0,463033645  | 0,521705269 | 0,093629008  | SLC6A9 ier family 6ain-coding ,th protein G00000196517  |
| 9641      | 0,008793886 | 0,02690155 | 0,191825855 | <b>-0,617244</b> | 7,548048638 | 8,165292594 | 0,112603 | -0,212421744 | 0,128066129 | -0,273837066 | IKBKE ide gene ein-coding ,th protein G00000263528      |
| 148213    | 0,013828123 | 0,02692717 | 0,191677541 | <b>-3,047114</b> | 2,954358502 | 6,001472964 | 0,110491 | -1,797203395 | 0,837237534 | 0,061443979  | ZNF681 nger proteain-coding ,th protein G00000191612    |
| 84176     | 0,011623378 | 0,02696135 | 0,191810586 | <b>-0,734474</b> | 5,203838136 | 5,938311869 | 0,284373 | -0,200919929 | 0,076468251 | -0,442667421 | MYH16 y chain 16 pseudogenseudogenG0000002079           |
| 90634     | 0,030996193 | 0,02697388 | 0,191789565 | <b>-0,788127</b> | 4,278071943 | 5,066199014 | 0,758839 | -0,138432453 | 0,859024408 | 0,045857409  | N4BP2L1 nding proteain-coding ,th protein G00000139597  |
| 29950     | 0,007295753 | 0,027003   | 0,19166653  | <b>0,6525649</b> | 8,494714341 | 7,842149423 | 0,002609 | 0,263386164  | 0,165127198 | 0,237934963  | SERTAD1 omain conain-coding ,th protein G00000197019    |
| 7056      | 0,013067416 | 0,02702559 | 0,191716984 | <b>0,5371329</b> | 14,22567255 | 13,68853967 | 0,128227 | 0,302625559  | 0,001311283 | -1,321008966 | THBD ombomodein-coding ,th protein G00000178726         |
| 81537     | 0,021047535 | 0,02711579 | 0,192136788 | <b>0,7167817</b> | 9,478139355 | 8,761357616 | 0,203076 | 0,232004737  | 0,162266306 | 0,334681728  | SGPP1 phosphateain-coding ,th protein G00000126821      |
| 3119      | 0,030831838 | 0,02715165 | 0,192280858 | <b>-0,671854</b> | 5,406413102 | 6,078267513 | 0,320012 | 0,143858381  | 0,024852411 | -0,607327974 | HLA-DQB1 ility complein-coding ,th protein G00000179344 |
| 343637    | 0,029739952 | 0,02716313 | 0,192252239 | <b>0,598426</b>  | 6,923849407 | 6,325423439 | 0,634    | 0,141567405  | 0,203532265 | 0,243057767  | RSPO4 r-spondin ain-coding ,th protein G000000101282    |
| 2671      | 0,019212727 | 0,02728872 | 0,192700716 | <b>0,5028886</b> | 7,370232628 | 7,370232628 | 0,089153 | 0,30506816   | 0,22258446  | 0,223369306  | GFER ymenter of ain-coding ,th protein G00000127554     |
| 26191     | 0,030752349 | 0,02735751 | 0,192746878 | <b>-1,280102</b> | 3,924579937 | 5,204682279 | 0,462998 | 0,098316349  | 0,129100839 | -0,577489061 | PTPN22 sphatase, ain-coding ,th protein G00000132422    |
| 3434      | 0,030949532 | 0,02736124 | 0,192663583 | <b>0,6601055</b> | 9,26142487  | 6,703139394 | 0,03363  | 0,639525424  | 0,387263068 | 0,200929564  | IFIT1 ain with tain-coding ,th protein G00000185745     |
| 83394     | 0,017829563 | 0,02737683 | 0,192554425 | <b>0,5467151</b> | 7,281164602 | 6,73444955  | 0,170064 | 0,237303711  | 0,440237001 | 0,133605059  | PITPNM3 1 family mernin-coding ,th protein G00000091622 |
| 140680    | 0,011384781 | 0,02740162 | 0,192619435 | <b>-0,588186</b> | 6,186498964 | 6,774685146 | 0,565764 | -0,134792256 | 0,336565316 | -0,191700018 | C20orf96 20 open reain-coding ,th protein G00000196476  |

|           |             |            |             |           |             |              |          |              |             |              |               |                                                 |
|-----------|-------------|------------|-------------|-----------|-------------|--------------|----------|--------------|-------------|--------------|---------------|-------------------------------------------------|
| 80757     | 0,007706035 | 0,02743803 | 0,192656651 | 0,8490121 | 7,525850495 | 6,676838436  | 0,231764 | 0,435896073  | 0,030223496 | 0,527800792  | TMEM121       | mbane prein-coding, th protein G00000184986     |
| 55194     | 0,029441184 | 0,02746122 | 0,192492131 | 0,7617579 | 5,460462251 | 4,698704313  | 0,474244 | 0,343113399  | 0,220473802 | 0,388877212  | EVA1B         | i-1 homologin-coding, th protein G00000142694   |
| 14        | 0,011045269 | 0,02753612 | 0,192798908 | 0,7301346 | 9,341192466 | 8,611057865  | 0,258381 | 0,162250891  | 0,182489647 | 0,274242264  | AAMP          | ed migratcin-coding, th protein G00000127837    |
| 11027     | 0,009408732 | 0,02764014 | 0,193090614 | 0,6881926 | 5,956934248 | 5,268741662  | 0,01989  | 0,791531376  | 0,744808248 | -0,062610264 | LILRA2        | noglobulinin-coding, th protein G00000233998    |
| 59269     | 0,014785566 | 0,02764019 | 0,19298214  | 0,690456  | 6,809156818 | 6,118700812  | 0,842813 | 0,050983986  | 0,085356088 | 0,42381044   | HIVEP3        | irus type 1in-coding, th protein G00000127124   |
| 1290      | 0,02803983  | 0,02765314 | 0,192746582 | 0,5093827 | 4,67403588  | 4,164653181  | 0,084271 | 0,468100443  | 0,803204454 | -0,050106921 | COL5A2        | type V alphin-coding, th protein G00000204262   |
| 91452     | 0,00952228  | 0,02765618 | 0,192659397 | -1,734473 | 8,172937656 | 9,907411098  | 0,239082 | -0,5847528   | 0,230982121 | -0,133975012 | ACBD5         | ling domainin-coding, th protein G00000107897   |
| 51451     | 0,014240998 | 0,02768284 | 0,19262843  | -0,653626 | 8,91092134  | 9,564546891  | 0,244746 | -0,153660889 | 0,098095914 | -0,38145544  | LCMT1         | xylyl methylin-coding, th protein G00000205629  |
| 4800      | 0,028125355 | 0,02769537 | 0,192607377 | 0,5329108 | 8,18244871  | 7,649537863  | 0,05317  | 0,346910014  | 0,261804396 | 0,191173797  | NFYA          | tion factoein-coding, th protein G00000001167   |
| 6301      | 0,030313714 | 0,02772628 | 0,192714181 | 0,5391875 | 11,40561547 | 10,86642795  | 0,10735  | 0,306605961  | 0,053367239 | 0,362860246  | SARS          | tRNA syntfin-coding, th protein G00000031698    |
| 28985     | 0,008345728 | 0,0277346  | 0,192663855 | 0,5256166 | 12,17111347 | 11,64549692  | 0,10344  | 0,260174913  | 0,31933532  | 0,156498549  | MCTS1         | iation and in-coding, th protein G00000232119   |
| 100289410 | 0,026487025 | 0,02778108 | 0,192878559 | -0,827182 | 5,919195497 | 6,746377361  | 0,537923 | -0,270605492 | 0,912992405 | -0,021416493 | MCF2L-AS1     | antisense n-coding Rlong non-cG00000235280      |
| 84858     | 0,025800388 | 0,02779011 | 0,192833163 | 0,5199566 | 6,138315385 | 5,61835875   | 0,118822 | 0,307036654  | 0,660069405 | -0,062071661 | ZNF503        | nger proteain-coding, th protein G00000165655   |
| 3315      | 0,017836039 | 0,02784756 | 0,192907603 | 0,5211003 | 11,26810829 | 10,74700794  | 0,401298 | 0,155004325  | 0,601527067 | 0,081725352  | HSPB1         | n family B in-coding, th protein G00000106211   |
| 10990     | 0,008955062 | 0,02788422 | 0,192945734 | 0,5336788 | 5,474030085 | 4,940351288  | 0,012313 | 0,561183174  | 0,593955586 | 0,072102831  | LILRB5        | noglobulinin-coding, th protein G00000105609    |
| 55231     | 0,031875649 | 0,0279153  | 0,193052905 | 0,6158936 | 7,013909019 | 6,39801541   | 0,32007  | 0,391329725  | 0,517122065 | 0,113670459  | CDC87         | domain coain-coding, th protein G00000182791    |
| 22925     | 0,02853058  | 0,02796187 | 0,1931593   | -0,67178  | 5,67325049  | 6,345030731  | 0,306581 | -0,433227533 | 0,146270247 | -0,338747201 | PLAZR1        | lipase A2 rein-coding, th protein G00000153246  |
| 4082      | 0,019306378 | 0,0279803  | 0,19317885  | -0,744312 | 10,92483759 | 11,66914962  | 0,281153 | -0,26543984  | 0,074144733 | -0,552574592 | MARCKS        | rich protein-coding, th protein G00000277443    |
| 7593      | 0,01165415  | 0,02798344 | 0,193092901 | 0,5720889 | 6,511491489 | 5,939402637  | 0,50508  | 0,143586337  | 0,924585947 | 0,013875182  | MZF1          | oid zinc finin-coding, th protein G00000099326  |
| 81610     | 0,025381546 | 0,02809927 | 0,193461084 | 0,5080923 | 9,217278225 | 8,709185926  | 0,002741 | 0,200186643  | 0,019693115 | 0,481272656  | FAM83D        | nce similain-coding, th protein G00000101447    |
| 85352     | 0,031620612 | 0,02811251 | 0,193444687 | -0,707785 | 4,810814835 | 5,518600247  | 0,180647 | -0,680244486 | 0,763435964 | 0,071679721  | KIAA1644      | KIAA1644 in-coding, th protein G00000138944     |
| 1051      | 0,014329957 | 0,02811906 | 0,193382346 | 0,9772992 | 13,7949248  | 12,81762561  | 0,052088 | 0,411112982  | 0,31933532  | 0,49528084   | CEBPB         | ncer bindingin-coding, th protein G00000172216  |
| 728228    | 0,029164678 | 0,02814227 | 0,193434561 | 0,646051  | 5,541305017 | 4,895253995  | 0,893422 | 0,088555464  | 0,237050663 | 0,335122196  | LINC01433on   | protein n-coding Rlong non-cG00000230176        |
| 84726     | 0,028611012 | 0,0282425  | 0,193800805 | 0,5593101 | 8,622686775 | 8,063376637  | 0,268629 | 0,165168283  | 0,230828009 | 0,214545165  | PRRC2B        | rich coiledin-coding, th protein G00000130723   |
| 79608     | 0,006830678 | 0,02827099 | 0,193781614 | 2,235102  | 2,235102031 | 0            | 0,858405 | -0,218950668 | 0,06282288  | 2,16697524   | RIC3          | hline recepin-coding, th protein G00000166405   |
| 286161    | 0,027044689 | 0,02831682 | 0,193881146 | -0,706793 | 6,801222167 | 7,508015093  | 0,059299 | -0,314796725 | 0,072734803 | -0,352899901 |               |                                                 |
| 375056    | 0,031754083 | 0,02842801 | 0,193999034 | 0,5992001 | 8,82482564  | 8,22562555   | 0,141024 | 0,322977925  | 0,253360214 | 0,183419938  | MIA3          | ember 3, Eain-coding, th protein G00000154305   |
| 643454    | 0,021557779 | 0,02842933 | 0,193901209 | -0,724867 | 8,894074672 | 9,618941382  | 0,055638 | -0,235721254 | 0,662340113 | -0,084953185 |               |                                                 |
| 134147    | 0,015697951 | 0,02844038 | 0,193869805 | -0,879952 | 7,541970058 | 8,421922455  | 0,060784 | -0,346316813 | 0,016856927 | -0,502800649 | CMBL          | enebutenoain-coding, th protein G00000164237    |
| 5671      | 0,032253515 | 0,02850502 | 0,194096768 | -1,187215 | 6,96837607  | 8,155592021  | 0,672756 | -0,13623332  | 0,331701229 | -0,386543913 | PSG3          | ific beta-1in-coding, th protein G00000221826   |
| 9181      | 0,032614954 | 0,02850683 | 0,194002481 | 0,5119549 | 7,511850083 | 6,9989895168 | 0,996501 | -0,001067074 | 0,139217089 | 0,244767873  | ARHGEF2       | nucleotide in-coding, th protein G00000116584   |
| 51284     | 0,016328342 | 0,02856497 | 0,193971793 | -1,48369  | 2,467537763 | 3,951227982  | 0,334955 | -0,443010598 | 0,501792814 | 0,264660147  | TLR7          | like receptin-coding, th protein G00000196664   |
| 7697      | 0,016144872 | 0,02856615 | 0,193873519 | -0,727    | 7,569513108 | 8,295132446  | 0,209905 | -0,669743294 | 0,937770909 | 0,018204299  | ZNF138        | nger proteain-coding, th protein G00000197008   |
| 80161     | 0,018507096 | 0,02869817 | 0,194449865 | 0,6922733 | 7,567678325 | 6,875405012  | 0,913125 | -0,01448559  | 0,176656854 | 0,299724969  | ASMTL-AS1     | antisense n-coding Rlong non-cG00000236017      |
| 400550    | 0,032808091 | 0,02871025 | 0,194319156 | 0,5471962 | 6,612786006 | 6,065589768  | 0,018415 | 0,949017654  | 0,167249565 | -0,360861148 | FENDRR        | ling develon-coding Rlong non-cG00000268388     |
| 29078     | 0,025226807 | 0,02873476 | 0,194378829 | 0,5225324 | 9,7310478   | 9,208515404  | 0,63172  | 0,066631911  | 0,120709795 | 0,223875593  | NDUFAP4       | eductase cain-coding, th protein G00000123545   |
| 10381     | 0,032241509 | 0,02881187 | 0,194581635 | 0,9181374 | 8,257195204 | 7,339057816  | 0,027714 | 0,481875361  | 0,901227183 | 0,027146106  | TUBB3         | in beta 3 clain-coding, th protein G00000258947 |
| 3475      | 0,029191156 | 0,02887699 | 0,194702896 | 0,5764219 | 9,519885774 | 8,94346389   | 0,136459 | 0,203013484  | 0,229862029 | 0,226705631  | IFRD1         | d developrain-coding, th protein G00000006652   |
| 6285      | 0,022148648 | 0,02887871 | 0,194608564 | 1,4114343 | 4,492106647 | 3,080672357  | 0,807146 | 0,141216196  | 0,31127037  | 0,701556863  | S100B         | um bindingin-coding, th protein G00000160307    |
| 5826      | 0,013667943 | 0,02892476 | 0,19460126  | -0,549643 | 7,196718549 | 7,746361382  | 0,253549 | -0,156659583 | 0,321427956 | -0,051671722 | ABCD4         | ette subfaain-coding, th protein G00000119688   |
| 202       | 0,029612108 | 0,02894953 | 0,194662194 | -0,918291 | 5,592375715 | 6,510666909  | 0,232982 | -0,480475605 | 0,851593217 | 0,033604882  | AIM1          | it in melanein-coding, th protein G00000112297  |
| 3029      | 0,024478598 | 0,02896371 | 0,194651857 | 0,5010343 | 10,35188079 | 9,850846514  | 0,199917 | 0,224674864  | 0,081867522 | 0,347040072  | HAGH          | lglutathionin-coding, th protein G00000063854   |
| 6279      | 0,012635491 | 0,02901426 | 0,194569304 | 0,7023802 | 5,114460956 | 4,412080732  | 0,779275 | 0,18932899   | 0,444804997 | -0,216289347 | S100A8        | im binding in-coding, th protein G00000143546   |
| 11231     | 0,010552754 | 0,02902775 | 0,19444923  | 0,5913829 | 9,671688655 | 9,080305725  | 0,300846 | 0,197474361  | 0,004181987 | 0,318223807  | SEC63         | rotein transin-coding, th protein G00000025796  |
| 3065      | 0,029215646 | 0,02906747 | 0,194610032 | 0,5297036 | 9,810866188 | 9,281162582  | 0,255247 | 0,190544086  | 0,717178647 | 0,063490081  | HDAC1         | ne deacetyin-coding, th protein G00000116478    |
| 92346     | 0,018642404 | 0,02906897 | 0,19451493  | -1,194898 | 3,568789343 | 4,763687441  | 0,504612 | -0,539743797 | 0,154398234 | -0,561242635 | C1orf105      | l open reacain-coding, th protein G00000180999  |
| 131375    | 0,02820307  | 0,02908209 | 0,194497648 | -1,016449 | 3,694165368 | 4,710614808  | 0,317479 | -0,337280013 | 0,006066169 | -1,156482413 | LYZ4          | sozyme likein-coding, th protein G00000157093   |
| 4807      | 0,033010662 | 0,02915072 | 0,194536456 | 1,2314303 | 4,603509446 | 3,372079117  | 0,112041 | 0,625322596  | 0,360565881 | 0,339894681  | NHLH1         | t helix-loopain-coding, th protein G00000171786 |
| 5587      | 0,020693425 | 0,02921431 | 0,19475098  | 0,6162964 | 3,995679332 | 3,379382906  | 0,094087 | 1,214756717  | 0,312714013 | -0,577507785 | PRKD1         | tein kinasein-coding, th protein G00000184304   |
| 731223    | 0,032198515 | 0,0293029  | 0,194608334 | 1,3186056 | 3,933444959 | 2,614839408  | 0,128307 | 2,488363989  | 0,241209282 | -1,618584219 | LINC01220n    | protein n-coding Rlong non-cG00000259687        |
| 91526     | 0,009472774 | 0,02932533 | 0,19465297  | 1,0398576 | 5,682373208 | 4,642579558  | 0,079318 | 0,240395755  | 0,077546453 | 0,623751705  | ANKRD44       | repeat doain-coding, th protein G00000065413    |
| 100526664 | 0,026791131 | 0,02937798 | 0,194897976 | -1,045491 | 5,614964946 | 5,614960808  | 0,081626 | -0,449589876 | 0,892214771 | -0,037757831 | .Y75-CD30D302 | readt other eadthroughG00000248672              |
| 161725    | 0,032120502 | 0,02945041 | 0,195169401 | 0,6169772 | 5,597725384 | 4,980748177  | 0,057605 | 0,607431151  | 0,5027127   | -0,160480334 | OTUD7A        | eubiquitinin-coding, th protein G00000169918    |
| 8970      | 0,012071503 | 0,02950156 | 0,195195068 | -0,711268 | 6,106981237 | 7,322249295  | 0,415808 | -0,200625961 | 0,654679239 | 0,051583158  | HIST1H2Bjr    | 1 H2B faain-coding, th protein G00000124635     |
| 65981     | 0,030268095 | 0,02950557 | 0,195117373 | 0,5692468 | 8,771237314 | 8,201990512  | 0,196821 | 0,275945737  | 0,104716282 | 0,279758415  | CAPRIN2       | family meain-coding, th protein G00000108888    |
| 5097      | 0,03216781  | 0,02952207 | 0,195122278 | 0,8427869 | 7,372538016 | 6,529751166  | 0,04346  | 0,816038831  | 0,614543115 | -0,097417692 | PCDH1         | stocaderherin-coding, th protein G00000156453   |
| 9791      | 0,010502951 | 0,02963024 | 0,195317167 | 0,5233761 | 9,81346563  | 9,290089572  | 0,049933 | 0,178035207  | 0,050998705 | 0,280456643  | PTDSS1        | idylserine sin-coding, th protein G00000156471  |
| 168667    | 0,015062064 | 0,02968215 | 0,195242635 | 0,5449964 | 5,797302733 | 5,25230332   | 0,19716  | 0,133015141  | 0,250333858 | 0,183709551  | BMPER         | g endothein-coding, th protein G00000164619     |
| 114786    | 0,032153757 | 0,02972385 | 0,195309517 | -2,331269 | 1,070106598 | 3,401375227  | 0,683558 | 0,560656345  | 0,259985776 | -0,979740255 | XKR4          | CK related in-coding, th protein G00000206579   |

|        |             |            |             |           |              |             |          |              |             |              |            |                                                  |
|--------|-------------|------------|-------------|-----------|--------------|-------------|----------|--------------|-------------|--------------|------------|--------------------------------------------------|
| 84984  | 0,013076427 | 0,02978972 | 0,195327832 | -0,620626 | 6,420887197  | 7,041513591 | 0,333636 | -0,552255502 | 0,034431902 | 0,20485496   | CEP19      | osomal protein-coding, th protein G00000174007   |
| 387890 | 0,01910265  | 0,0298007  | 0,195193184 | -1,004046 | 4,589855546  | 5,593901259 | 0,556871 | -0,436842607 | 0,16247829  | -0,354058282 | TMEM233    | mbrane protein-coding, th protein G00000224982   |
| 79937  | 0,024727681 | 0,02990242 | 0,195342962 | -0,590032 | 5,594526954  | 6,184558465 | 0,050919 | -0,786976804 | 0,159722263 | -0,299158583 | CNTNAP3    | sociated protein-coding, th protein G00000106714 |
| 9260   | 0,021251961 | 0,0299332  | 0,195337942 | 0,8363891 | 10,06329473  | 9,22690565  | 0,564167 | 0,13711636   | 0,147493247 | 0,414083827  | PDLIM7     | nd LIM domain-coding, th protein G00000196923    |
| 399473 | 0,027691787 | 0,02993532 | 0,195146174 | 0,5858759 | 6,578948227  | 5,993072298 | 0,115814 | 0,578731309  | 0,99206583  | 0,001861917  | SPRED3     | EVH1 domain-coding, th protein G00000188766      |
| 253650 | 0,033226063 | 0,02996286 | 0,195120328 | -0,922539 | 3,68708636   | 4,609625251 | 0,039936 | -0,823739027 | 0,431200021 | -0,251405928 | ANKRD18    | Arepeat domain-coding, th protein G00000180071   |
| 3006   | 0,014567576 | 0,03000784 | 0,19531051  | -0,857087 | 11,59612123  | 12,45320793 | 0,81258  | -0,130213665 | 0,312204242 | -0,238789421 | HIST1H1C   | r 1 H1 farsein-coding, th protein G00000187837   |
| 1550   | 0,0209657   | 0,03007147 | 0,195621843 | 1,2984338 | 4,6595715    | 3,361137748 | 0,58268  | 0,285686881  | 0,691322523 | 0,189314427  | CYP2A7P1   | subfamily pseudogenouseudogenG00000213908        |
| 144402 | 0,033882268 | 0,03008697 | 0,195619973 | -0,583573 | 7,072966232  | 7,65653968  | 0,253922 | -0,228593037 | 0,770838263 | -0,043464323 | CPNE8      | copine 8 ein-coding, th protein G00000139117     |
| 23436  | 0,020960151 | 0,03010394 | 0,195525011 | 1,3530817 | 4,815324401  | 3,462242681 | 0,249625 | -0,757702704 | 0,055947197 | 1,225767148  | CELA3B     | elastase faein-coding, th protein G00000219073   |
| 10826  | 0,03376271  | 0,03018783 | 0,195761933 | -0,554008 | 6,548697404  | 7,102704941 | 0,473301 | 0,130513065  | 0,014919824 | -0,697187312 | FAXDC2     | xylase domain-coding, th protein G00000170271    |
| 729987 | 0,03022379  | 0,03019022 | 0,195674996 | -1,661119 | 4,141470316  | 5,802589448 | 0,20955  | -0,991425375 | 0,221370381 | -0,961642348 |            |                                                  |
| 55165  | 0,020236649 | 0,03023175 | 0,195739322 | 0,6447546 | 10,0850818   | 9,440327235 | 0,98559  | 0,004593284  | 0,004470554 | 0,545627122  | CEP55      | osomal protein-coding, th protein G00000138180   |
| 10078  | 0,02276441  | 0,03027393 | 0,195807708 | 0,5630467 | 9,3386378369 | 8,775631714 | 0,065886 | 0,320623804  | 0,572180305 | 0,089688085  | TSSC4      | subtransfein-coding, th protein G00000184281     |
| 84287  | 0,032809156 | 0,03028166 | 0,195754526 | -0,538944 | 8,999292645  | 9,53823657  | 0,880545 | -0,026630764 | 0,663439957 | -0,066339158 | ZDHHC16    | HHC-type ein-coding, th protein G00000171307     |
| 768    | 0,016707268 | 0,03035412 | 0,195917101 | -0,731471 | 6,668583242  | 7,400054075 | 0,681986 | -0,096355943 | 0,051610682 | -0,617890033 | CA9        | nic anhydrein-coding, th protein G00000107159    |
| 340090 | 0,007993089 | 0,03041262 | 0,19609035  | -2,098337 | 2,753688488  | 4,852024999 | 0,127417 | -1,385008039 | 0,182120422 | -1,102496782 |            |                                                  |
| 11119  | 0,014239791 | 0,03043835 | 0,196052124 | -0,525987 | 7,554909121  | 8,080896552 | 0,777753 | 0,050642035  | 0,049320799 | -0,515816668 | BTN3A1     | subfamily ein-coding, th protein G00000026950    |
| 375567 | 0,031306588 | 0,03053687 | 0,196482322 | 1,4258609 | 4,357910812  | 2,93204993  | 0,333854 | 0,791975417  | 0,536135986 | 0,301557937  | VWC2       | actor C domain-coding, th protein G00000188730   |
| 9770   | 0,033847605 | 0,03059355 | 0,196337035 | 0,5929948 | 5,561676353  | 4,968681576 | 0,303309 | 0,214612531  | 0,179171781 | 0,324731867  | RASSF2     | domain faein-coding, th protein G00000101265     |
| 8794   | 0,01520137  | 0,03064551 | 0,196568628 | -0,645978 | 6,2282896565 | 6,868874791 | 0,610561 | 0,069549861  | 0,021266855 | -0,239833299 | TNFRSF10c  | superfamily ein-coding, th protein G00000173535  |
| 4666   | 0,015631107 | 0,03076443 | 0,197127304 | 0,7658844 | 9,510285292  | 8,744400872 | 0,005822 | 0,209224958  | 0,166429172 | 0,346130301  | NACA       | associated ein-coding, th protein G00000196531   |
| 115196 | 0,017882364 | 0,03080091 | 0,197258975 | 0,5336533 | 7,468010257  | 6,934356964 | 0,006659 | 0,339922258  | 0,576881394 | 0,079424013  | ZNF554     | nger proteein-coding, th protein G00000172006    |
| 403296 | 0,026637666 | 0,03080271 | 0,197168579 | -0,562976 | 7,2690477    | 7,832023354 | 0,010763 | -0,495518756 | 0,319017406 | -0,128371688 | OR7E154P   | subfamily pseudogenouseudogenG00000254715        |
| 7531   | 0,013240405 | 0,03084283 | 0,197323373 | -0,76061  | 10,603282325 | 11,36383301 | 0,109749 | -0,390206659 | 0,118993436 | 0,403390949  | YWHAE      | an 5-monocin-coding, th protein G00000108953     |
| 27030  | 0,031190867 | 0,0308745  | 0,197322163 | -0,587493 | 6,19108086   | 6,778574166 | 0,202501 | -0,691990693 | 0,853841222 | -0,029192522 | MLH3       | trL homologein-coding, th protein G00000119684   |
| 90806  | 0,02815173  | 0,03092179 | 0,197217343 | -0,63843  | 7,335214444  | 7,973643995 | 0,137426 | -0,424673271 | 0,369716959 | -0,173903608 | ANGEL2     | gel homologein-coding, th protein G00000174606   |
| 9915   | 0,011969209 | 0,03096277 | 0,197275543 | -0,681459 | 6,93608107   | 7,617540445 | 0,246658 | -0,191675118 | 0,686339942 | -0,049875191 | ARNT2      | ceptor nueein-coding, th protein G00000172379    |
| 9982   | 0,026052352 | 0,03097589 | 0,197257661 | -0,791205 | 4,359056537  | 5,150261916 | 0,865928 | 0,042400513  | 0,148579184 | -0,433601675 | FGFBP1     | th factor beiein-coding, th protein G00000137440 |
| 6882   | 0,011432843 | 0,0310161  | 0,197412213 | 1,0796547 | 10,42197896  | 9,342324231 | 0,021222 | 0,776476483  | 0,261693819 | 0,213485269  | TAF11      | protein assein-coding, th protein G00000064995   |
| 79912  | 0,019039378 | 0,031058   | 0,197475966 | 0,5968921 | 7,849236529  | 7,252344446 | 0,06988  | 0,264269678  | 0,64761909  | 0,050899685  | PYROXD1    | ulphide oxaein-coding, th protein G00000121350   |
| 3354   | 0,020090228 | 0,03107282 | 0,197367545 | 1,1018429 | 5,192117882  | 4,090274994 | 0,165453 | 0,669359303  | 0,181356038 | 0,408791027  | HTR1E      | ryptamine ein-coding, th protein G00000168830    |
| 54584  | 0,011362552 | 0,03110929 | 0,197396764 | 0,513838  | 6,388519625  | 6,902357598 | 0,407451 | -0,073630105 | 0,075874678 | 0,201530507  | GNB1L      | ubunit beiein-coding, th protein G00000185838    |
| 6717   | 0,013959102 | 0,03121325 | 0,197954965 | 0,6894751 | 11,62652475  | 10,93704967 | 0,039363 | 0,288835743  | 0,120791949 | 0,356710631  | SRI        | sorcin ein-coding, th protein G00000075142       |
| 203260 | 0,03222114  | 0,03123994 | 0,197820361 | 0,6795031 | 10,712277475 | 10,03277475 | 0,133576 | 0,289497761  | 0,181327197 | 0,317170124  | CCDC107    | omain corsein-coding, th protein G00000159884    |
| 84557  | 0,034904764 | 0,0312434  | 0,197741194 | 0,5223574 | 7,74634568   | 7,223988284 | 0,191457 | 0,322645534  | 0,433578412 | 0,146791431  | MAP1LC3Aed | protein ein-coding, th protein G00000101460      |
| 340526 | 0,020167784 | 0,03125591 | 0,197719335 | 1,2022967 | 10,89059576  | 9,688299094 | 0,079736 | 0,990404654  | 0,608295661 | -0,227100901 | RGAG4      | n gag domain-coding, th protein G00000242732     |
| 122773 | 0,011183282 | 0,0312629  | 0,1976626   | -0,79695  | 5,740337098  | 6,537287514 | 0,167903 | -0,283963833 | 0,176062995 | -0,33653562  | KLHDC1     | main contain-coding, th protein G00000197776     |
| 149992 | 0,035105616 | 0,03127298 | 0,197625485 | 1,4798247 | 3,740031759  | 2,260207046 | 0,246592 | 0,76914903   | 0,245426572 | 0,801388822  | NKRD30BP1  | omain 30 pseudogenouseudogenG00000224309         |
| 64840  | 0,034917271 | 0,03132337 | 0,197540729 | -0,556065 | 9,419876665  | 9,975941857 | 0,333443 | -0,240842167 | 0,158468296 | -0,274808846 | PORCN      | homolog (ein-coding, th protein G00000102312     |
| 23190  | 0,02420585  | 0,03133035 | 0,197484189 | -0,774504 | 9,633488158  | 10,40799182 | 0,103495 | -0,302445135 | 0,843480078 | -0,044136195 | UBXN4      | lomain proein-coding, th protein G00000144224    |
| 2934   | 0,00915378  | 0,03136977 | 0,197531624 | -0,575659 | 8,657210074  | 9,232869358 | 0,454077 | -0,12862484  | 0,012853461 | -0,620027419 | GSN        | gelsolin ein-coding, th protein G00000148180     |
| 84671  | 0,03453471  | 0,03149065 | 0,198091408 | -0,920461 | 6,734633947  | 7,655094455 | 0,634401 | -0,145267755 | 0,352311463 | -0,280672171 | ZNF347     | nger proteein-coding, th protein G00000197937    |
| 3269   | 0,034682069 | 0,03149275 | 0,198004018 | 0,5061533 | 6,467651258  | 5,961497933 | 0,565334 | 0,302724335  | 0,949329225 | -0,032375209 | HRH1       | nine receptein-coding, th protein G00000196639   |
| 401480 | 0,023864269 | 0,03166581 | 0,198688687 | 0,738845  | 7,453746016  | 6,714901017 | 0,320761 | 0,389947608  | 0,517865557 | 0,226299888  |            |                                                  |
| 23002  | 0,034117704 | 0,03168025 | 0,198678617 | -0,566369 | 7,701092641  | 8,267461533 | 0,127554 | -0,104925688 | 0,121335517 | -0,325730042 | DAAM1      | id activatoein-coding, th protein G00000100592   |
| 5105   | 0,029298932 | 0,03170354 | 0,198623551 | 0,5622527 | 4,520936679  | 3,958683984 | 0,165112 | 0,70502046   | 0,254161339 | -0,165477491 | PKC1       | ryruvate caein-coding, th protein G00000124253   |
| 80320  | 0,028360354 | 0,03170801 | 0,198551139 | -0,591838 | 7,357600896  | 7,949439114 | 0,313334 | -0,197311673 | 0,30834541  | -0,213042071 | SP6        | nscriptionein-coding, th protein G00000189120    |
| 9935   | 0,03349778  | 0,03171032 | 0,198465297 | 0,6533283 | 6,648523912  | 5,995195653 | 0,708673 | -0,286796946 | 0,189635802 | 0,301657645  | MAFB       | transcriptein-coding, th protein G00000204103    |
| 79080  | 0,014097933 | 0,03179207 | 0,198675729 | 0,8912752 | 9,546661118  | 8,655385906 | 0,851987 | 0,039580438  | 0,303417947 | 0,286757209  | CCDC86     | domain coein-coding, th protein G00000110104     |
| 54566  | 0,027125546 | 0,03186261 | 0,198415813 | 0,5071278 | 7,175468908  | 6,668341111 | 0,647437 | 0,149215113  | 0,958531172 | 0,013845924  | EPB41L4B   | irane proteein-coding, th protein G00000095203   |
| 5669   | 0,008299575 | 0,0318728  | 0,19837951  | -2,992057 | 3,300811372  | 6,292868146 | 0,335205 | -0,644875579 | 0,176552677 | -1,162364302 | PSG1       | ific beta-1ein-coding, th protein G00000231924   |
| 26502  | 0,016460197 | 0,03188431 | 0,198351494 | 0,6526836 | 9,463389061  | 8,810705444 | 0,000673 | 0,408922059  | 0,257466545 | 0,220263653  | NARF       | min A recoein-coding, th protein G00000141562    |
| 342918 | 0,023717864 | 0,03191685 | 0,198354685 | 0,5164909 | 6,461025537  | 5,944534651 | 0,071469 | 0,416221291  | 0,382935234 | -0,151057203 | C19orf81   | L9 open reaein-coding, th protein G00000235034   |
| 4619   | 0,023447143 | 0,03202189 | 0,198708379 | 0,5591907 | 3,089136889  | 3,248946226 | 0,209488 | 0,82457491   | 0,496508396 | -0,358060031 | MYH1       | in heavy cfsein-coding, th protein G00000109061  |
| 3753   | 0,0113713   | 0,03204796 | 0,198671063 | -0,525878 | 5,958156983  | 6,484034731 | 0,180106 | -0,377029467 | 0,539036301 | -0,076990395 | KCNE1      | annel subfein-coding, th protein G00000180509    |
| 374378 | 0,03469225  | 0,03208248 | 0,198785587 | 0,5274124 | 7,780115814  | 7,252703413 | 0,754395 | 0,083551906  | 0,339065895 | 0,260334929  | GALNT18    | /galactosaein-coding, th protein G00000110328    |
| 29948  | 0,029406082 | 0,03218581 | 0,199226481 | -0,550271 | 6,701773442  | 7,252044547 | 0,088446 | -0,488210213 | 0,197548094 | -0,159367892 | OSGIN1     | induced greein-coding, th protein G00000140961   |
| 2707   | 0,035990895 | 0,03218846 | 0,199143367 | -0,850717 | 5,812765999  | 6,663482824 | 0,516861 | -0,151650746 | 0,726509825 | -0,077423219 | GJB3       | tion proteein-coding, th protein G00000188910    |

|           |             |            |             |           |              |             |          |              |             |              |           |                                                 |
|-----------|-------------|------------|-------------|-----------|--------------|-------------|----------|--------------|-------------|--------------|-----------|-------------------------------------------------|
| 79165     | 0,029986842 | 0,03223319 | 0,199320514 | 0,6660193 | 8,286722624  | 7,620703315 | 0,376223 | 0,12786067   | 0,381418921 | 0,181471992  | LENG1     | eptor clustein-coding, th protein G00000105617  |
| 5167      | 0,032926888 | 0,03226908 | 0,199343395 | 0,5453853 | 8,862763132  | 8,317377844 | 0,061596 | 0,370867105  | 0,28178544  | 0,205674485  | ENPP1     | osphatasein-coding, th protein G00000197594     |
| 93624     | 0,031005804 | 0,03240432 | 0,199680885 | 0,8183691 | 7,668426061  | 6,850056985 | 0,097305 | 0,273914654  | 0,133415265 | 0,456725156  | TADA2B    | ptional adaein-coding, th protein G00000173011  |
| 5997      | 0,027850936 | 0,03248142 | 0,199857696 | 0,9158678 | 7,181558625  | 6,265690821 | 0,191898 | 0,348065025  | 0,321697193 | -0,256792176 | RG52      | f G-proteinin-coding, th protein G00000116741   |
| 51655     | 0,033869336 | 0,03250999 | 0,199934187 | 0,8472695 | 9,293423462  | 8,446153983 | 0,066142 | 0,673062203  | 0,129252816 | -0,478570838 | RASD1     | xamethasain-coding, th protein G00000108551     |
| 5740      | 0,023958742 | 0,03252618 | 0,199835331 | 0,6463059 | 5,018395784  | 4,372089911 | 0,021636 | 0,962909625  | 0,527768603 | -0,132421431 | PTGIS     | l2 (prostate)in-coding, th protein G00000124212 |
| 112714    | 0,036392683 | 0,03254695 | 0,199764717 | -0,780779 | 5,15982472   | 5,94060345  | 0,468172 | -0,420575041 | 0,482299324 | -0,193184251 | TUBA3E    | ulin alpha in-coding, th protein G00000152086   |
| 26022     | 0,031902754 | 0,03275439 | 0,200145301 | 0,8379618 | 6,164726821  | 5,32676499  | 0,036257 | 0,683093934  | 0,927998817 | 0,02181066   | TMEM98    | mbrane prain-coding, th protein G00000006042    |
| 285636    | 0,035856072 | 0,0327626  | 0,200096786 | 0,8815307 | 8,412486059  | 7,53095533  | 0,276364 | 0,343507474  | 0,047437526 | 0,650813185  | C5orf51   | 5 open reain-coding, th protein G00000205765    |
| 9924      | 0,014348296 | 0,03277558 | 0,200077394 | -0,551934 | 5,897685893  | 6,449619402 | 0,017376 | -0,352950632 | 0,433315735 | -0,114509826 | PAN2      | ecific riborain-coding, th protein G00000135473 |
| 54930     | 0,013351415 | 0,03292027 | 0,200073171 | -0,645426 | 8,774854504  | 9,420280914 | 0,066102 | -0,252661419 | 0,013480831 | -0,293580615 | HAU54     | like compain-coding, th protein G00000092036    |
| 441024    | 0,013814009 | 0,03294881 | 0,200148427 | 0,6000138 | 6,977689819  | 6,377685108 | 0,784992 | -0,076457307 | 0,217534668 | 0,220927071  | MTHFD2L   | hydrogenain-coding, th protein G00000163738     |
| 120776    | 0,034707225 | 0,03312812 | 0,20064725  | 0,6951353 | 4,825551762  | 4,130416512 | 0,625042 | 0,049490883  | 0,083325944 | 0,382029062  | OR2D2     | amily 2 sutzain-coding, th protein G00000166368 |
| 23650     | 0,035502378 | 0,03313894 | 0,200614685 | -0,513309 | 7,78761249   | 8,300921086 | 0,204369 | 0,186018454  | 0,004806491 | -0,916757361 | TRIM29    | motif contain-coding, th protein G00000137699   |
| 9906      | 0,021130077 | 0,03317951 | 0,200664105 | -0,515112 | 10,39877918  | 10,91389803 | 0,173837 | -0,263084422 | 0,78191655  | -0,034528918 | SLC35E2   | r family 35ain-coding, th protein G00000215790  |
| 763       | 0,034974093 | 0,0332221  | 0,200823617 | 0,6820452 | 5,185751842  | 4,503706678 | 0,029191 | 0,740941879  | 0,595039859 | -0,124067443 | CASA      | nic anhydrazin-coding, th protein G00000174990  |
| 1891      | 0,029682658 | 0,03324454 | 0,200861226 | -0,574417 | 10,09646599  | 10,67088255 | 0,623197 | -0,061078721 | 0,2043978   | -0,264966936 | ECH1      | -CoA hydrazin-coding, th protein G00000104823   |
| 3934      | 0,023399865 | 0,03325276 | 0,200812983 | -1,630563 | 10,33870647  | 11,96926907 | 0,145871 | -0,67031323  | 0,371022223 | -0,48782071  | LCN2      | lipocalin 2 in-coding, th protein G00000148346  |
| 4357      | 0,033160659 | 0,03328182 | 0,200890502 | -0,562978 | 7,429579639  | 7,992557719 | 0,34582  | 0,415759893  | 0,248462933 | -0,491892697 | MPST      | uvate sulfain-coding, th protein G00000128309   |
| 4793      | 0,025751972 | 0,03331294 | 0,200784774 | 0,8203246 | 8,025552435  | 7,205227826 | 0,09627  | 0,403094336  | 0,123589537 | 0,482382258  | NFKBIB    | B inhibitor ain-coding, th protein G00000104825 |
| 2509      | 0,024599297 | 0,03336435 | 0,200801545 | -0,623259 | 15,82746973  | 16,4507289  | 0,106275 | -0,264345914 | 0,639227439 | -0,064718993 | FTHP5     | y chain 1 pseudeogenseudogenG00000230204        |
| 91807     | 0,010566968 | 0,03339691 | 0,200899887 | 0,7293948 | 5,173217357  | 4,443822582 | 0,08826  | 0,464910456  | 0,230673753 | 0,272734551  | MYLK3     | light chain ain-coding, th protein G00000140795 |
| 63910     | 0,024359884 | 0,03340262 | 0,200836695 | 0,6262929 | 8,440782827  | 7,814489971 | 0,085053 | 0,336017948  | 0,394873797 | 0,175700298  | SLC17A9   | er family 1ain-coding, th protein G00000101194  |
| 168620    | 0,033012982 | 0,03345448 | 0,200953363 | 0,6054481 | 7,520529366  | 6,915081252 | 0,194528 | 0,653597003  | 0,896097137 | -0,024214838 | BHLHA15   | -helix famain-coding, th protein G00000180535   |
| 339400    | 0,024308219 | 0,03348094 | 0,200917467 | -0,673911 | 5,303371311  | 5,977281812 | 0,018065 | -0,780661218 | 0,081125384 | 0,49491542   | FLG-AS1   | antisense Rn-coding Rlong non-cG00000237975     |
| 5366      | 0,033052469 | 0,03349572 | 0,200811556 | -1,014007 | 9,915372012  | 10,92937892 | 0,088400 | -0,681370161 | 0,439115535 | -0,23875189  | PMAIP1    | e-13-acetaain-coding, th protein G00000141682   |
| 57186     | 0,035120757 | 0,03356153 | 0,200720308 | -0,887029 | 5,537865163  | 6,424896531 | 0,129142 | -0,548772111 | 0,289086334 | 0,303330416  | RALGAP2   | protein caain-coding, th protein G00000118552   |
| 83901     | 0,009682822 | 0,0335707  | 0,200581455 | -2,140791 | 3,260395326  | 5,40118602  | 0,532746 | -0,25996013  | 0,598592545 | 0,267491099  | KRTAP9-8  | sociated paain-coding, th protein G00000187272  |
| 266722    | 0,01373342  | 0,0335724  | 0,20049488  | 2,8583977 | 3,565389993  | 7,06999226  | 0,245845 | 1,213791979  | 0,581002672 | 0,572877838  | HS6T3     | te 6-O-sulfain-coding, th protein G00000185352  |
| 718       | 0,023002111 | 0,0335745  | 0,200410828 | -1,404285 | 7,898368599  | 9,302653489 | 0,068508 | -0,633276748 | 0,129970185 | -0,779251435 | C3        | plement ain-coding, th protein G00000125730     |
| 79158     | 0,009154617 | 0,03381556 | 0,2010745   | -0,695856 | 7,199936421  | 7,895792592 | 0,060296 | -0,473054806 | 0,670118046 | -0,068694911 | GNPTAB    | hate transfain-coding, th protein G00000111670  |
| 5203      | 0,037217222 | 0,03384372 | 0,201048912 | 0,5157431 | 8,326432682  | 7,810689586 | 0,576168 | -0,54233122  | 0,932373288 | -0,025358907 | PFND4     | oldin subuain-coding, th protein G00000101132   |
| 677777    | 0,009293443 | 0,0338526  | 0,20100525  | -0,643218 | 9,195995446  | 9,839213656 | 0,151797 | -0,889214976 | 0,17051238  | -0,246745876 | SCARNA12  | body-specn-coding Rl small nuclG00000238795     |
| 100131938 | 0,015586878 | 0,03386205 | 0,200965024 | 0,7360453 | 6,788903262  | 6,052857967 | 0,008773 | 0,916328693  | 0,209077616 | -0,288757695 |           |                                                 |
| 4982      | 0,037255168 | 0,03389616 | 0,200974885 | -1,463435 | 3,855831135  | 5,319265984 | 0,185674 | -0,653329758 | 0,549347606 | -0,300365825 | TNFRSF11B | uperfamain-coding, th protein G00000164761      |
| 3433      | 0,009704813 | 0,03392364 | 0,200849363 | 1,0471057 | 8,766941234  | 7,719835488 | 0,067427 | 1,115643967  | 0,581448222 | -0,22298175  | IFIT2     | ain with tain-coding, th protein G00000119922   |
| 10627     | 0,030283123 | 0,03397533 | 0,200963268 | -0,58294  | 13,37159529  | 13,95453575 | 0,999457 | 0,000126041  | 0,330146071 | -0,197438543 | MYL12A    | n light chaain-coding, th protein G00000185303  |
| 23552     | 0,031753913 | 0,03402528 | 0,200970833 | 0,6467528 | 7,109603258  | 6,462850451 | 0,04326  | 0,323090261  | 0,894716837 | -0,025765456 | CDK20     | pendent kaain-coding, th protein G00000156345   |
| 2730      | 0,009558322 | 0,03402585 | 0,200878377 | -0,779537 | 8,827568071  | 9,607104716 | 0,006246 | -0,72262785  | 0,336626029 | 0,194110932  | GCLM      | ine ligase ain-coding, th protein G00000023909  |
| 114926    | 0,026535917 | 0,03406368 | 0,200814582 | -0,824175 | 6,782510334  | 7,606685717 | 0,105969 | -0,503008998 | 0,791547925 | 0,060614791  | SMIM19    | il membrrain-coding, th protein G00000176209    |
| 285628    | 0,028725856 | 0,0340894  | 0,200775074 | -1,496861 | 6,538873603  | 8,035734414 | 0,059287 | -0,807930096 | 0,693363969 | -0,120044399 |           |                                                 |
| 84301     | 0,009643722 | 0,0341183  | 0,200849742 | -0,562527 | 6,860133118  | 7,422659941 | 0,204253 | -0,670679379 | 0,583168199 | 0,079426007  | DDI2      | inducible ain-coding, th protein G00000197312   |
| 201229    | 0,019840855 | 0,03415631 | 0,200978008 | -0,97777  | 6,501001277  | 7,478771086 | 0,401094 | -0,569825873 | 0,010620239 | -0,716761338 | LYRM9     | iotif contain-coding, th protein G00000232859   |
| 9699      | 0,036086619 | 0,03426303 | 0,20122357  | 0,537203  | 4,33015631   | 3,792953283 | 0,071124 | 0,775462412  | 0,436920871 | -0,247267627 | RIMS2     | itic membrrain-coding, th protein G00000176406  |
| 79735     | 0,035218757 | 0,03427919 | 0,201127768 | 0,7353436 | 8,967213646  | 8,231870021 | 0,008488 | 0,656411389  | 0,389857953 | 0,200851435  | TBC1D17   | ain family rain-coding, th protein G00000104946 |
| 23313     | 0,028171018 | 0,0343219  | 0,201092577 | -0,67071  | 6,355881651  | 7,026592078 | 0,009996 | -0,550312509 | 0,16890344  | -0,01238291  | KIAA0930  | KIAA0930 ain-coding, th protein G00000100364    |
| 131096    | 0,021832086 | 0,03438163 | 0,201157073 | 1,532141  | 2,284306909  | 0,752165942 | 0,720339 | -0,423163274 | 0,090426089 | 1,368499991  | KCNH8     | ad channel ain-coding, th protein G00000183960  |
| 280       | 0,023688911 | 0,03440153 | 0,20117847  | -0,755938 | 5,294709469  | 6,050647109 | 0,010881 | -0,428073598 | 0,04782968  | -0,323513757 | AMY2B     | alpha 2B (paain-coding, th protein G00000240038 |
| 84993     | 0,025791714 | 0,0344636  | 0,201446335 | 0,6306298 | 9,389611565  | 8,759891777 | 0,141442 | 0,333922575  | 0,502311086 | 0,13162434   | UBL7      | iquitin likeain-coding, th protein G00000138629 |
| 8313      | 0,009492692 | 0,03450324 | 0,201487892 | 0,5535154 | 5,576123782  | 5,022608378 | 0,707832 | 0,080791124  | 0,101489875 | 0,414547579  | AXIN2     | axin 2 ain-coding, th protein G00000168646      |
| 643224    | 0,037950006 | 0,03452194 | 0,201502056 | 0,5855453 | 10,60639862  | 10,02085337 | 0,187198 | 0,3003441    | 0,348445297 | 0,197873715  | TUBBP5    | beta pseudseudogenseudogenG00000159247          |
| 195827    | 0,012437427 | 0,03454087 | 0,201422703 | -0,674608 | 8,651361861  | 9,325969871 | 0,131197 | -0,233718152 | 0,052827937 | -0,206119912 | AAED1     | nt enzyme ain-coding, th protein G00000158122   |
| 100128590 | 0,009351939 | 0,0346787  | 0,201656813 | 2,6723261 | 2,672326088  | 0           | 0,411968 | 1,404805931  | 0,422649731 | 1,342133905  | lC8A1-AS1 | antisensn-coding Rlong non-cG00000227028        |
| 79695     | 0,01037199  | 0,0347762  | 0,20175016  | -0,606658 | 5,759777271  | 6,36643479  | 0,113999 | -0,486432583 | 0,933577817 | 0,012974556  | GALNT12   | /lgalactosaain-coding, th protein G00000119514  |
| 6335      | 0,038474264 | 0,03484997 | 0,201800089 | -1,171504 | 3,28808927   | 4,500313616 | 0,84528  | 0,07335259   | 0,125428837 | -0,74935124  | SCN9A     | ated channain-coding, th protein G00000169432   |
| 143888    | 0,022085888 | 0,0349161  | 0,202088525 | -0,659961 | 7,952748765  | 8,612710076 | 0,086959 | -0,312033268 | 0,17936426  | 0,305448788  | KDEL2C    | notif contain-coding, th protein G00000178202   |
| 138428    | 0,037975597 | 0,03496921 | 0,20192411  | 0,5803563 | 9,465503541  | 9,465503541 | 0,02296  | 0,401010553  | 0,040591886 | 0,466015423  | PTRH1     | IA hydrolasain-coding, th protein G00000187024  |
| 131149    | 0,038742367 | 0,03503526 | 0,201928964 | 0,5984166 | 2,0280498213 | 1,430083601 | 0,661233 | 0,312022251  | 0,321886842 | -0,626321252 | OTOL1     | otolin 1 ain-coding, th protein G00000182447    |
| 7169      | 0,018528603 | 0,03503541 | 0,201835885 | 1,1714894 | 9,64997333   | 8,478483946 | 0,852369 | 0,066321815  | 0,030666759 | 0,461012008  | TPM2      | myosin 2 (ain-coding, th protein G00000198467   |

|           |             |            |             |                  |              |             |          |              |             |              |           |                                                 |
|-----------|-------------|------------|-------------|------------------|--------------|-------------|----------|--------------|-------------|--------------|-----------|-------------------------------------------------|
| 91442     | 0,014983763 | 0,03504138 | 0,201682672 | <b>0,594624</b>  | 6,859070442  | 6,264446475 | 0,24361  | -0,328646132 | 0,469462525 | 0,116445664  | FAAP24    | complex protein G00000131944                    |
| 79174     | 0,034161463 | 0,03508829 | 0,201765143 | <b>0,6703314</b> | 8,775835015  | 8,105503613 | 0,212972 | 0,365918547  | 0,10264987  | 0,437065539  | CREDL2    | with EGF ligand-coding, th protein G00000184164 |
| 124149    | 0,015570494 | 0,03518695 | 0,202144786 | <b>0,8690143</b> | 3,542531214  | 2,673516899 | 0,099207 | 0,886013721  | 0,251525214 | 0,519600323  | ANKRD26P  | domain 2 pseudogenes G00000261239               |
| 253725    | 0,033028955 | 0,03520498 | 0,202060925 | <b>-0,572896</b> | 8,8179022    | 9,390798215 | 0,074757 | -0,306790908 | 0,217150483 | -0,250662804 | FAM21C    | ence similar-coding, th protein G00000172661    |
| 3267      | 0,012775313 | 0,03527335 | 0,202078764 | <b>-0,602792</b> | 8,5902673805 | 9,193065388 | 0,070922 | -0,372606732 | 0,121108703 | 0,021455428  | AGFG1     | with FG repeat-coding, th protein G00000173744  |
| 54504     | 0,021005913 | 0,0352974  | 0,202029655 | <b>-0,809151</b> | 5,678638951  | 6,487790358 | 0,276507 | -0,277760387 | 0,303449299 | -0,185110501 | CPVL      | tidase, viterin-coding, th protein G00000106066 |
| 255119    | 0,016731473 | 0,03532467 | 0,202092339 | <b>2,4039574</b> | 3,414379589  | 1,010422221 | 0,979507 | 0,024162875  | 0,046855448 | 1,953927462  | C4orf22   | 4 open read-coding, th protein G00000197826     |
| 57659     | 0,012246734 | 0,03532675 | 0,202010954 | <b>0,6416653</b> | 9,794199356  | 9,152534049 | 0,345889 | 0,232782089  | 0,764190867 | 0,036944221  | ZBTB4     | BTB domain-coding, th protein G00000174282      |
| 1462      | 0,035994526 | 0,0353613  | 0,202115195 | <b>0,6222223</b> | 4,564092529  | 3,941870263 | 0,046077 | 0,603135643  | 0,902426466 | -0,026747239 | VCAN      | versican-coding, th protein G00000038427        |
| 157310    | 0,038406739 | 0,03541098 | 0,202212559 | <b>0,5370138</b> | 4,954030364  | 4,417016528 | 0,249879 | 0,457435467  | 0,98407481  | -0,006137047 | PEBP4     | niolamine-coding, th protein G00000134020       |
| 6759      | 0,034930455 | 0,03544621 | 0,20222727  | <b>1,0921338</b> | 2,715288232  | 1,623154386 | 0,211342 | 0,403341666  | 0,347723636 | 0,239537499  | SSX4      | amily mem-coding, th protein G00000268009       |
| 79693     | 0,026890085 | 0,03549393 | 0,202406283 | <b>0,5762707</b> | 10,38229537  | 9,806024693 | 0,106797 | 0,225982723  | 0,252983306 | 0,228941851  | YRDC      | noyltrans-coding, th protein G00000196449       |
| 113763    | 0,014476534 | 0,03554917 | 0,20225568  | <b>-0,836076</b> | 9,210027913  | 10,04610371 | 0,867671 | 0,043096044  | 0,040811186 | -0,5789105   | ZBED6CL   | 6 C-termin-coding, th protein G00000188707      |
| 23529     | 0,027677277 | 0,03557927 | 0,202334008 | <b>0,5561959</b> | 9,471369343  | 8,915173424 | 0,571602 | 0,112211869  | 0,253942498 | 0,272453641  | CLCF1     | in-like cyto-coding, th protein G00000175505    |
| 817       | 0,019630731 | 0,03557965 | 0,202243275 | <b>-0,663192</b> | 7,869029343  | 8,532221656 | 0,063137 | -0,223260373 | 0,216569725 | -0,265337756 | CAMK2D    | ependent-coding, th protein G00000145349        |
| 5051      | 0,019825698 | 0,0356164  | 0,20235932  | <b>-0,785855</b> | 5,4989607657 | 6,285662542 | 0,002404 | -0,362812041 | 0,221340213 | -0,120910403 | PAFAH2    | ng factor-coding, th protein G00000158006       |
| 57232     | 0,013032877 | 0,03563931 | 0,202303904 | <b>-0,663289</b> | 5,008229461  | 5,671518228 | 0,561469 | -0,183833238 | 0,561454963 | 0,173243981  | ZNF630    | nger prote-coding, th protein G00000221994      |
| 149830    | 0,028120712 | 0,03569687 | 0,202259827 | <b>0,7524847</b> | 3,804596988  | 3,052112299 | 0,100849 | 1,103052006  | 0,86436841  | -0,082281562 | PRNT      | tein (testis) other unknown G00000180259        |
| 100128554 | 0,015893918 | 0,03573243 | 0,202368753 | <b>2,6800807</b> | 3,267477609  | 0,587462694 | 0,125846 | 1,86528023   | 0,395863711 | 0,9296326    |           |                                                 |
| 26184     | 0,02634631  | 0,03574599 | 0,202168228 | <b>-1,177887</b> | 4,119012142  | 5,296898801 | 0,589377 | 0,378366047  | 0,553822987 | -0,368426044 | OR1F2P    | 1 subfamily pseudogenes G00000203581            |
| 5705      | 0,028628499 | 0,03582461 | 0,202151351 | <b>0,5164597</b> | 11,56849781  | 11,05203815 | 0,183514 | 0,176724926  | 0,28694124  | 0,195866616  | PSMC5     | 26S subunit-coding, th protein G00000087191     |
| 169611    | 0,020106836 | 0,03609835 | 0,203325501 | <b>-0,877045</b> | 6,767993914  | 7,645038858 | 0,45544  | -0,193430794 | 0,186845695 | -0,399500469 | OLFM2A    | tomedin like-coding, th protein G00000185585    |
| 9709      | 0,013312627 | 0,03610366 | 0,203262935 | <b>0,8748842</b> | 10,91754742  | 10,04266321 | 0,026878 | 0,723527531  | 0,065415522 | 0,332803923  | HERPUD1   | protein-coding, th protein G00000051108         |
| 285033    | 0,027749483 | 0,03613444 | 0,203343834 | <b>0,5451592</b> | 6,562395479  | 6,017236266 | 0,346437 | -0,238430488 | 0,33852194  | 0,170409568  | TARD7-AS7 | antisense-coding Rlong non-cG00000204685        |
| 54882     | 0,021761833 | 0,03624    | 0,203291331 | <b>0,5472142</b> | 9,133944851  | 8,586730636 | 0,422613 | 0,227124277  | 0,433871271 | 0,195560244  | ANKHD1    | nd KH domain-coding, th protein G00000131503    |
| 152065    | 0,013256774 | 0,03628405 | 0,20344626  | <b>0,7724217</b> | 5,881905917  | 5,109484244 | 0,22905  | 0,14508718   | 0,241582531 | 0,266196735  | C3orf22   | 3 open read-coding, th protein G00000180697     |
| 84641     | 0,011456546 | 0,03629353 | 0,203407362 | <b>-0,600483</b> | 8,563734801  | 9,164217523 | 0,017104 | -0,3788451   | 0,654131812 | -0,066439609 | MFS14B    | erfamily d-coding, th protein G00000148110      |
| 50484     | 0,036756135 | 0,03629815 | 0,20334124  | <b>-0,857472</b> | 6,457099725  | 7,314571741 | 0,246073 | -0,512657915 | 0,501655784 | 0,173939074  | RRM2B     | egulatory T-coding, th protein G00000048392     |
| 254065    | 0,012027243 | 0,03634389 | 0,203321594 | <b>-0,633751</b> | 6,469993991  | 7,103689959 | 0,186449 | -0,530545031 | 0,340570326 | 0,181168178  | BRWD3     | VD repeat-coding, th protein G00000165288       |
| 91351     | 0,031849465 | 0,03634551 | 0,203147131 | <b>-0,8378</b>   | 6,492439924  | 7,330239924 | 0,369149 | -0,206630384 | 0,863424223 | -0,042679867 | DXD60L    | ox helicase-coding, th protein G00000181381     |
| 5547      | 0,019609922 | 0,03636822 | 0,203182407 | <b>-0,637793</b> | 8,607033889  | 9,244826994 | 0,519134 | -0,027042924 | 0,07330972  | -0,165297315 | PRCP      | arboxype-coding, th protein G00000137509        |
| 6713      | 0,02903699  | 0,03644198 | 0,203319332 | <b>0,5019087</b> | 8,861465384  | 8,359556667 | 0,252791 | 0,24409564   | 0,77952194  | -0,044786785 | SQLE      | ilene epoxi-coding, th protein G00000104549     |
| 399706    | 0,011764757 | 0,03647202 | 0,20339534  | <b>0,6302075</b> | 5,831161884  | 5,200943475 | 0,159426 | 0,509496379  | 0,498340908 | -0,190825477 | LINC00200 | on-protein-coding Rlong non-cG00000229205       |
| 55714     | 0,04018615  | 0,03655469 | 0,203489857 | <b>-0,739879</b> | 4,586100127  | 5,325979385 | 0,026721 | -0,827725962 | 0,841214488 | 0,03968555   | TENM3     | nsmembran-coding, th protein G00000218336       |
| 55861     | 0,030735968 | 0,03662612 | 0,203704405 | <b>0,5497051</b> | 5,573481638  | 5,023776557 | 0,748134 | -0,146590272 | 0,179808473 | 0,778913175  | DBNDD2    | domain-coding, th protein G00000244274          |
| 5458      | 0,014287717 | 0,03668747 | 0,203862501 | <b>-1,884071</b> | 2,998515215  | 4,882585746 | 0,600866 | -0,349761586 | 0,720862402 | -0,101152634 | POU4F2    | ass 4 home-coding, th protein G00000151615      |
| 27121     | 0,03707984  | 0,03669344 | 0,20380425  | <b>0,6028367</b> | 5,515387408  | 4,912550663 | 0,61372  | 0,073175481  | 0,032469885 | 0,534870664  | DKK4      | gnaling pat-coding, th protein G00000104371     |
| 10146     | 0,012008115 | 0,03670977 | 0,203803566 | <b>-0,970947</b> | 9,747935406  | 10,71888223 | 0,001015 | -0,559147886 | 0,477235858 | -0,173662266 | G3BP1     | ranule asse-coding, th protein G00000145907     |
| 2110      | 0,010315261 | 0,03673976 | 0,203878656 | <b>-0,942197</b> | 5,560007435  | 6,502204269 | 0,188269 | -0,641347201 | 0,314419143 | 0,247712997  | ETFDH     | flavoprotein-coding, th protein G00000171503    |
| 10558     | 0,027851123 | 0,03674406 | 0,203811237 | <b>-0,552984</b> | 8,453433475  | 9,006417559 | 0,658397 | -0,084907418 | 0,258787836 | -0,21183455  | SPTLC1    | ferase long-coding, th protein G00000090054     |
| 94134     | 0,028982949 | 0,03680625 | 0,203882288 | <b>-0,902545</b> | 8,580084176  | 9,482629257 | 0,20523  | -0,453599356 | 0,823992065 | -0,059015175 | ARHGAP12  | activating-coding, th protein G00000165322      |
| 142       | 0,013612521 | 0,03685263 | 0,203956762 | <b>-0,641828</b> | 8,528933371  | 9,17076187  | 0,013638 | -0,349905406 | 0,913844634 | -0,00824709  | PARP1     | ribose) pol-coding, th protein G00000143799     |
| 54841     | 0,018256286 | 0,03697207 | 0,204252707 | <b>-0,651858</b> | 6,066664153  | 6,7185223   | 0,01613  | -0,496828401 | 0,619680929 | -0,051046852 | BIVM      | in-like vari-coding, th protein G00000134897    |
| 11278     | 0,019016755 | 0,03697854 | 0,204197381 | <b>-0,695301</b> | 5,677243935  | 6,372545164 | 0,048823 | -0,336041627 | 0,778639439 | -0,03277752  | KLF12     | hel like fact-coding, th protein G00000118922   |
| 3933      | 0,012448058 | 0,03714692 | 0,204579956 | <b>0,6579337</b> | 5,732184029  | 5,074250323 | 0,097999 | 0,433389833  | 0,202169018 | 0,164888306  | LCN1      | lipocalin 1-coding, th protein G00000160349     |
| 599       | 0,011592315 | 0,03715798 | 0,204549891 | <b>0,5499899</b> | 11,53787278  | 10,98788291 | 0,800877 | 0,030845621  | 0,511217377 | -0,089666004 | BCL2L2    | BCL2 like 2-coding, th protein G00000129473     |
| 50839     | 0,034295665 | 0,03721782 | 0,204697362 | <b>-0,581084</b> | 5,990707626  | 6,789897647 | 0,06938  | -0,565123396 | 0,962450834 | -0,007521308 | TAS2R10   | ceptor me-coding, th protein G00000121318       |
| 338653    | 0,040697494 | 0,03722725 | 0,20465834  | <b>-0,635323</b> | 6,154574405  | 6,789897647 | 0,437063 | 0,261856726  | 0,24668984  | -0,425035569 | KCNQ1-AS1 | antisense-coding Rlong non-cG00000229414        |
| 100131289 | 0,021856575 | 0,03725781 | 0,204735481 | <b>-1,251869</b> | 4,039344204  | 5,29121277  | 0,423252 | -1,638893423 | 0,205687139 | -0,544778922 |           |                                                 |
| 7162      | 0,024920017 | 0,03733896 | 0,205090409 | <b>0,7034655</b> | 8,372598263  | 7,66913275  | 0,359289 | 0,242602918  | 0,158765675 | 0,196641207  | TPBG      | blast glyco-coding, th protein G00000146242     |
| 154091    | 0,037770366 | 0,03736165 | 0,205124088 | <b>-0,934801</b> | 5,550218164  | 6,485018784 | 0,078915 | -0,622192471 | 0,24163341  | -0,375318783 | SLC2A12   | er family 2-coding, th protein G00000146411     |
| 3049      | 0,02632914  | 0,03742634 | 0,205115911 | <b>0,5342517</b> | 5,521335673  | 4,987084014 | 0,657381 | 0,192437502  | 0,316655485 | 0,230165409  | HQB1      | bin subunit-coding, th protein G00000086506     |
| 79180     | 0,037958672 | 0,03743645 | 0,205080225 | <b>0,5868276</b> | 11,88441446  | 11,29758688 | 0,159305 | 0,219577277  | 0,203978669 | 0,214861435  | EFHD2     | nain family-coding, th protein G00000142634     |
| 26683     | 0,017942557 | 0,03744364 | 0,204938309 | <b>0,9240722</b> | 3,65947571   | 2,735403557 | 0,035909 | -1,716474221 | 0,041582979 | 1,233709122  | OR4F3     | amily 4 sub-coding, th protein G00000230178     |
| 83879     | 0,020864426 | 0,03746838 | 0,204983169 | <b>-0,983985</b> | 5,684351093  | 6,668355929 | 0,018999 | -0,918952287 | 0,489801194 | 0,219625318  | CDC47     | on cycle asse-coding, th protein G00000144354   |
| 578       | 0,018971878 | 0,03751374 | 0,205140691 | <b>0,5880194</b> | 8,753841825  | 8,16562239  | 0,170839 | 0,30150158   | 0,929076612 | 0,014298149  | BAK1      | ntagonist-coding, th protein G00000030110       |
| 84298     | 0,013162442 | 0,03765047 | 0,205616061 | <b>0,6158997</b> | 9,97595137   | 9,3636917   | 0,660827 | -0,141982235 | 0,009066326 | 0,315412106  | LLPH      | ng-term s-argin-coding, th protein G00000139233 |
| 10485     | 0,013929743 | 0,03765409 | 0,205545222 | <b>-0,503399</b> | 4,679484213  | 5,182883462 | 0,932384 | -0,02736637  | 0,121509392 | -0,302917074 | C1orf61   | 1 open read-coding, th protein G00000125462     |
| 55370     | 0,036562449 | 0,03766974 | 0,205540034 | <b>-0,502798</b> | 6,288387208  | 6,791185504 | 0,275686 | -0,226482042 | 0,400377373 | -0,144943799 | PPP4R1L   | ulatory suseudogenes G00000124224               |

|           |             |            |             |                  |              |             |          |              |             |              |           |              |           |                          |
|-----------|-------------|------------|-------------|------------------|--------------|-------------|----------|--------------|-------------|--------------|-----------|--------------|-----------|--------------------------|
| 6996      | 0,040849076 | 0,03766974 | 0,205449562 | <b>0,589289</b>  | 8,466456976  | 7,877167939 | 0,331869 | 0,147747923  | 0,268794878 | -0,213735778 | TDG       | e DNA glyca  | in-coding | th protein G00000139372  |
| 403313    | 0,03355669  | 0,03771561 | 0,205428362 | <b>-0,958204</b> | 5,593247461  | 6,551451015 | 0,111845 | -0,953432177 | 0,229134866 | 0,273627614  | PLPP6     | lipid phosph | in-coding | th protein G00000205808  |
| 57111     | 0,011811572 | 0,03787052 | 0,205909929 | <b>-0,82296</b>  | 5,019580869  | 5,842541138 | 0,061775 | -0,18784537  | 0,008203103 | -0,305551114 | RAB25     | er RAS on    | in-coding | th protein G00000132698  |
| 11104     | 0,03901269  | 0,03793594 | 0,206175107 | <b>0,5944576</b> | 7,874327975  | 7,279870356 | 0,030376 | 0,353727897  | 0,348379628 | 0,149578036  | KATNA1    | atalytic su  | in-coding | th protein G00000186625  |
| 100132169 | 0,01217876  | 0,0379706  | 0,206182549 | <b>0,6924599</b> | 6,330080463  | 5,637620559 | 0,126902 | 0,431065885  | 0,597123027 | 0,111532727  | WASIR2    | ILSR antis   | in-coding | Rlong non-cG00000231439  |
| 9060      | 0,032036211 | 0,03802622 | 0,206394071 | <b>-0,730328</b> | 8,381133339  | 9,111461372 | 0,325053 | -0,166714677 | 0,80458278  | 0,043834175  | PAPSS2    | e 5'-phosp   | in-coding | th protein G00000198682  |
| 2255      | 0,030535961 | 0,0380749  | 0,206386943 | <b>1,4062497</b> | 4,243630334  | 2,837380601 | 0,194115 | 0,861884752  | 0,195297645 | 0,773160562  | FGF10     | st growth f  | in-coding | th protein G00000070193  |
| 50836     | 0,041058161 | 0,03813961 | 0,206376473 | <b>-1,827258</b> | 0,446595769  | 2,273854069 | 0,813108 | 0,410692796  | 0,874966134 | -0,193181964 | TAS2R8    | ceptor me    | in-coding | th protein G00000121314  |
| 1576      | 0,022697372 | 0,03817643 | 0,206485486 | <b>0,7093641</b> | 4,154599015  | 3,445234886 | 0,211499 | 0,985118951  | 0,862297829 | -0,109814157 | CYP3A4    | amily 3 su   | in-coding | th protein G00000160868  |
| 282566    | 0,011220339 | 0,03819726 | 0,206507977 | <b>-3,605107</b> | 2,300399422  | 5,905506197 | 0,001752 | -5,255205986 | 0,092619712 | -0,650300211 | LINC00515 | ion-protein  | in-coding | Rlong non-coding         |
| 57165     | 0,023502339 | 0,03824672 | 0,206594999 | <b>0,8313215</b> | 7,782507045  | 6,951185568 | 0,968555 | -0,00557424  | 0,453211199 | -0,195958462 | GJC2      | ion protein  | in-coding | th protein G000000198835 |
| 29893     | 0,040490389 | 0,03830509 | 0,206639949 | <b>0,5426159</b> | 8,46920606   | 7,926590136 | 0,003547 | 0,291596309  | 0,09546847  | 0,315961845  | PSMC3IP   | interactin   | in-coding | th protein G00000131470  |
| 90134     | 0,041806468 | 0,03831437 | 0,206600014 | <b>-0,589811</b> | 3,322236814  | 3,912047874 | 0,394241 | -0,461863173 | 0,464551196 | -0,340014508 | KCNH7     | sd channel   | in-coding | th protein G00000184611  |
| 3028      | 0,040560262 | 0,03852877 | 0,207124912 | <b>0,5971786</b> | 11,24025247  | 10,64307391 | 0,081461 | 0,227302251  | 0,160846095 | 0,311782875  | HSD17B10  | 17-beta de   | in-coding | th protein G00000072506  |
| 388610    | 0,02923842  | 0,03866351 | 0,207417903 | <b>1,329772</b>  | 6,165655912  | 4,835883888 | 0,145452 | 0,33762276   | 0,030698782 | 0,889731778  | TRNP1     | ated nucle   | in-coding | th protein G00000253368  |
| 9001      | 0,042199817 | 0,03863619 | 0,207342416 | <b>0,6534057</b> | 3,868971751  | 3,215566046 | 0,063061 | 0,503763334  | 0,254272661 | 0,288373015  | HAP1      | associat     | in-coding | th protein G00000173805  |
| 3128      | 0,016256517 | 0,03868382 | 0,207418297 | <b>-1,133311</b> | 11,42937888  | 12,56268958 | 0,039118 | -0,479954984 | 0,148459355 | -0,57268525  | HLA-DRB6  | mplex, clas  | seudogen  | seudogenG00000229391     |
| 3371      | 0,024394394 | 0,03869691 | 0,207398684 | <b>0,8244194</b> | 7,75328934   | 6,928869924 | 0,223033 | 0,07647347   | 0,055704054 | 0,327071677  | TNC       | tenascin C   | in-coding | th protein G00000041982  |
| 5427      | 0,015728635 | 0,03875897 | 0,207462018 | <b>-0,896282</b> | 8,14173737   | 9,038018939 | 0,070596 | -0,32809354  | 0,665236354 | -0,033684433 | POLE2     | epsilon 2,   | in-coding | th protein G00000100479  |
| 6059      | 0,014738148 | 0,03886692 | 0,207680801 | <b>-0,756971</b> | 9,335779293  | 10,09274998 | 0,016093 | -0,533755564 | 0,693287706 | 0,078379289  | ABCE1     | ette subfa   | in-coding | th protein G00000164163  |
| 126204    | 0,027553566 | 0,03897996 | 0,208194997 | <b>1,0534829</b> | 4,046465451  | 2,992982594 | 0,293737 | 0,963158489  | 0,817726629 | -0,187318435 | NLRP13    | rin domain   | in-coding | th protein G00000173572  |
| 6920      | 0,041064856 | 0,03898876 | 0,208152277 | <b>-0,556111</b> | 8,058068532  | 8,614180001 | 0,675449 | -0,098100023 | 0,309575867 | -0,188347821 | TCEA3     | n elongat    | in-coding | th protein G00000204219  |
| 100131060 | 0,042573268 | 0,03899914 | 0,208117968 | <b>0,5591716</b> | 6,386310992  | 5,827139409 | 0,009063 | 0,744111386  | 0,470201541 | -0,123355285 | LINC0113  | 5on-protein  | n-coding  | Rlong non-cG00000234807  |
| 8455      | 0,016840302 | 0,03900823 | 0,208076824 | <b>-0,509414</b> | 7,522453615  | 8,031868077 | 0,240098 | -0,233811216 | 0,887948013 | 0,018757176  | ATTRN     | attractin    | in-coding | th protein G00000088812  |
| 152137    | 0,042608355 | 0,03901867 | 0,208042906 | <b>0,6820922</b> | 10,8160722   | 10,13398002 | 0,128043 | 0,403759103  | 0,349843475 | -0,211947712 | CDC50     | domain co    | in-coding | th protein G00000152492  |
| 117156    | 0,026996215 | 0,03904347 | 0,207996085 | <b>-0,894543</b> | 4,12941493   | 5,023957956 | 0,439823 | -1,545426567 | 0,199655757 | -0,410951673 | SCGB3A2   | in family 3  | in-coding | th protein G00000164265  |
| 400644    | 0,042066661 | 0,03906657 | 0,207940271 | <b>-0,620632</b> | 5,724472674  | 6,345104221 | 0,761368 | 0,074827079  | 0,390688391 | -0,196709952 | LINC0144  | 3on-protein  | n-coding  | Rlong non-cG00000266554  |
| 126070    | 0,016388973 | 0,0390666  | 0,207851124 | <b>-0,609916</b> | 8,502084896  | 9,112001189 | 0,419632 | -0,187420159 | 0,376593363 | -0,190484831 | ZNF440    | nger prote   | in-coding | th protein G00000171295  |
| 11163     | 0,012117772 | 0,0390898  | 0,207885216 | <b>-0,600441</b> | 11,813864421 | 8,71427873  | 0,124639 | -0,494390583 | 0,192447722 | -0,279847339 | NUDT4     | fix hydro    | in-coding | th protein G00000173598  |
| 3930      | 0,041330258 | 0,03917408 | 0,208244017 | <b>-0,552849</b> | 10,05167259  | 10,60452151 | 0,059441 | -0,279713746 | 0,68380641  | 0,071603576  | LBR       | in B recep   | in-coding | th protein G00000143815  |
| 8073      | 0,021093303 | 0,03920989 | 0,208077186 | <b>0,5429554</b> | 12,95786859  | 12,41491318 | 0,920555 | 0,009111602  | 0,026969319 | 0,610762922  | PTPA42    | osphatase    | in-coding | th protein G00000184007  |
| 4644      | 0,032451133 | 0,03922249 | 0,207965856 | <b>-0,5488</b>   | 6,846120668  | 7,3949206   | 0,380992 | -0,230783723 | 0,303586526 | -0,193367344 | MYO5A     | mysosin V    | in-coding | th protein G00000197535  |
| 51734     | 0,039237164 | 0,03924294 | 0,207896294 | <b>0,5023726</b> | 8,439181445  | 7,936808879 | 0,095741 | 0,254994916  | 0,350648591 | 0,155142931  | MSRB1     | sulfoxide    | in-coding | th protein G00000198736  |
| 285382    | 0,012732708 | 0,03926191 | 0,207818979 | <b>-1,529083</b> | 2,859515596  | 4,388598137 | 0,170003 | -1,734748633 | 0,099209622 | 0,650236822  | C3orf70   | 3 open rea   | in-coding | th protein G00000187068  |
| 322       | 0,03415625  | 0,03927081 | 0,207777309 | <b>0,5180537</b> | 8,169635028  | 7,651581296 | 0,095239 | 0,416202657  | 0,809653901 | -0,037043786 | APBB1     | protein bi   | in-coding | th protein G00000166313  |
| 64748     | 0,034364726 | 0,0393434  | 0,207806302 | <b>0,5523451</b> | 8,034525201  | 7,482180083 | 0,127948 | 0,439423437  | 0,972172521 | -0,00573416  | PLPPR2    | h phosphat   | in-coding | th protein G00000105520  |
| 57493     | 0,040090754 | 0,03939054 | 0,207789475 | <b>-0,527081</b> | 8,42721286   | 8,95429373  | 0,876842 | -0,030018359 | 0,126959122 | -0,318642414 | HEG1      | rotein wit   | in-coding | th protein G00000173706  |
| 93349     | 0,028548694 | 0,03944767 | 0,207825287 | <b>-1,091732</b> | 6,049019108  | 7,14075153  | 0,21292  | -0,544449212 | 0,110195665 | -0,375371446 | SP140L    | lear body    | in-coding | th protein G00000185404  |
| 439943    | 0,021624225 | 0,03950261 | 0,207761248 | <b>3,0311136</b> | 3,756511952  | 0,725398365 | 0,199892 | 1,728116451  | 0,399237838 | 1,119417339  | TNF       | r necrosi    | in-coding | th protein G00000232810  |
| 7124      | 0,020961167 | 0,03957289 | 0,207869932 | <b>0,577776</b>  | 6,557719972  | 5,979943974 | 0,001377 | 0,712741297  | 0,021308297 | 0,313999839  | GALNT5    | ylgalactos   | in-coding | th protein G00000136542  |
| 11227     | 0,013861243 | 0,03967392 | 0,207867839 | <b>-0,572834</b> | 7,601769554  | 8,174603321 | 0,014348 | -0,486529015 | 0,174615686 | -0,178590647 | SLC25A30  | r family 2   | in-coding | th protein G00000174032  |
| 253512    | 0,027136813 | 0,03972769 | 0,207885738 | <b>-0,909823</b> | 5,710068496  | 6,619891294 | 0,043507 | -1,128275678 | 0,66982402  | -0,102197755 | RUVBL2    | ike AAA AT   | in-coding | th protein G00000183207  |
| 10856     | 0,028161962 | 0,03975147 | 0,207834588 | <b>0,5743918</b> | 11,260806061 | 10,68646881 | 0,164196 | 0,217351331  | 0,219499593 | 0,258398551  | LINC0092  | 3ion-protein | in-coding | Rlong non-cG00000251209  |
| 91948     | 0,043214981 | 0,03976145 | 0,207799046 | <b>2,5230621</b> | 3,101900064  | 0,578837987 | 0,008287 | 0,430101899  | 0,680041237 | -0,067394514 | CYP26B1   | mily 26 su   | in-coding | th protein G00000003137  |
| 56603     | 0,025665616 | 0,03976329 | 0,207721002 | <b>0,5365775</b> | 6,021378484  | 5,484800886 | 0,681381 | 0,455507339  | 0,924219089 | 0,047685917  | CT55      | /testis an   | in-coding | th protein G00000169551  |
| 54967     | 0,039799252 | 0,03978    | 0,207720721 | <b>1,7209521</b> | 4,268186194  | 2,547230466 | 0,531759 | -0,337836852 | 0,874646436 | -0,073069173 | IL1RAPL1  | ptor acces   | in-coding | th protein G00000169306  |
| 11141     | 0,030232376 | 0,03981465 | 0,207726494 | <b>-1,239228</b> | 4,93470936   | 6,173937732 | 0,714562 | 0,237442649  | 0,272710729 | 0,825094769  | BHMT2     | teine S-me   | in-coding | th protein G00000132840  |
| 23743     | 0,032456605 | 0,0399827  | 0,208252386 | <b>0,960472</b>  | 4,176386249  | 3,215914239 | 0,118819 | -0,288068623 | 0,964147864 | -0,006963466 | EPS15     | or recept    | in-coding | th protein G00000085832  |
| 2060      | 0,026645995 | 0,04011875 | 0,208697698 | <b>-0,535491</b> | 8,71940997   | 9,254901235 | 0,872919 | 0,114396065  | 0,929509486 | 0,02282899   | NKX6-3    | 5 homeobc    | in-coding | th protein G00000165066  |
| 157848    | 0,042704386 | 0,04013584 | 0,208698977 | <b>0,9995076</b> | 5,231955491  | 4,232447929 | 0,137476 | -0,64053707  | 0,235041509 | 0,296842762  | PIGN      | lycan anch   | in-coding | th protein G00000197563  |
| 23556     | 0,014382531 | 0,04021567 | 0,209026307 | <b>-0,821252</b> | 5,841068453  | 6,662320108 | 0,083043 | -0,458072435 | 0,950411079 | 0,013168816  | ZNF595    | nger prote   | in-coding | th protein G00000272602  |
| 152687    | 0,025486343 | 0,04022501 | 0,208987141 | <b>-0,750258</b> | 6,894346504  | 7,644640688 | 0,106359 | 0,560491068  | 0,751825393 | 0,06389085   | KIF18B    | amily me     | in-coding | th protein G00000186185  |
| 146909    | 0,037319906 | 0,04024204 | 0,208987974 | <b>0,5899881</b> | 7,813013021  | 7,223024955 | 0,504393 | 0,349998251  | 0,188245571 | 0,535895847  | DRAXIN    | ry axon gu   | in-coding | th protein G00000162490  |
| 374946    | 0,040793527 | 0,04027867 | 0,209002966 | <b>0,9144248</b> | 5,810738968  | 4,896314159 | 0,05702  | 0,404325537  | 0,779341114 | 0,068643359  | RASL10A   | amily 10     | in-coding | th protein G00000100276  |
| 10633     | 0,031252217 | 0,04029089 | 0,208891318 | <b>0,7765803</b> | 7,380431864  | 6,603851519 | 0,022953 | -1,717315819 | 0,148853186 | 0,145751396  | LINC0099  | 7on-protein  | in-coding | Rlong non-cG00000281332  |
| 401321    | 0,015036044 | 0,04035237 | 0,208947696 | <b>-1,190644</b> | 4,55739683   | 5,748040553 | 0,05038  | -0,558688467 | 0,810157136 | -0,059802086 | OTUB2     | , ubiquitin  | in-coding | th protein G00000089723  |
| 78990     | 0,018418654 | 0,0404313  | 0,208745501 | <b>-0,901527</b> | 7,9961022    | 8,897628847 | 0,163853 | -0,999421635 | 0,25041444  | -0,480071854 | SPATA9    | genesis as   | in-coding | th protein G00000145757  |
| 83890     | 0,0285531   | 0,04043217 | 0,208663011 | <b>-1,735316</b> | 2,7          |             |          |              |             |              |           |              |           |                          |

|           |             |            |             |            |              |              |          |              |              |              |            |                |            |              |              |              |
|-----------|-------------|------------|-------------|------------|--------------|--------------|----------|--------------|--------------|--------------|------------|----------------|------------|--------------|--------------|--------------|
| 3882      | 0,039209043 | 0,04050895 | 0,208711444 | 0,594044   | 4,76283129   | 4,168787268  | 0,764258 | -0,091458945 | 0,169305356  | 0,387059569  | KRT32      | keratin 32     | in-coding  | th           | protein      | G00000108759 |
| 64288     | 0,026396201 | 0,04057318 | 0,208868596 | -0,775111  | 5,581161186  | 6,356272123  | 0,705272 | -0,057376341 | 0,014449801  | -0,476761981 | ZSCAN31    | CAN domain     | -coding    | th           | protein      | G00000235109 |
| 29887     | 0,022555306 | 0,04066108 | 0,209234118 | -2,041346  | 4,325395887  | 6,366741901  | 0,122001 | -1,861557342 | 0,115618763  | -0,520153422 | SNX10      | rtng nexin     | in-coding  | th           | protein      | G00000086300 |
| 6844      | 0,016869932 | 0,04081347 | 0,209669879 | 0,5194802  | 9,747991451  | 9,228511262  | 0,763392 | -0,092153404 | 0,844746591  | 0,026469696  | VAMP2      | ited memb      | in-coding  | th           | protein      | G00000220205 |
| 79003     | 0,042137411 | 0,04089349 | 0,209646154 | 0,5255204  | 8,967678555  | 8,442158117  | 0,111948 | 0,342790511  | 0,263781671  | 0,165706581  | MIS12      | hore comp      | in-coding  | th           | protein      | G00000167842 |
| 201161    | 0,021405609 | 0,04095027 | 0,209676891 | 1,1367184  | 10,62387427  | 9,487155825  | 0,124964 | 0,186599177  | 0,207862589  | 0,493477555  | CENPV      | omere pro      | in-coding  | th           | protein      | G00000166582 |
| 112399    | 0,043621213 | 0,04095889 | 0,209634358 | -0,643878  | 6,962345864  | 7,606224122  | 0,974059 | -0,003801607 | 0,064036315  | -0,455827656 | ELGN3      | ypoxia ind     | in-coding  | th           | protein      | G00000129521 |
| 445372    | 0,044279317 | 0,04096399 | 0,2095739   | -0,7308    | 5,485080124  | 6,215879672  | 0,159499 | -0,655778654 | 0,952657339  | 0,01206703   | TM6-TRIM34 | reac other     | eadthrough | G00000258588 |              |              |
| 100128563 | 0,03906708  | 0,0410071  | 0,209534797 | 0,5493009  | 7,665261141  | 7,115960231  | 0,746732 | -0,086973234 | 0,016860857  | 0,524835802  |            |                |            |              |              |              |
| 10421     | 0,035470575 | 0,04100757 | 0,209450803 | 0,5222879  | 7,925629932  | 7,403342068  | 0,180069 | 0,21474005   | 0,976445716  | 0,004326158  | CD2BP2     | nic tail       | in-coding  | th           | protein      | G00000169217 |
| 55333     | 0,012434052 | 0,04105253 | 0,20959401  | 0,5302148  | 7,819981409  | 7,289766594  | 0,633737 | 0,074608426  | 0,844237679  | 0,031985833  | SYNJ2BP    | nin 2 bindi    | in-coding  | th           | protein      | G00000213463 |
| 284023    | 0,022681135 | 0,04111907 | 0,20967442  | 3,4264665  | 4,261470451  | 0,835003946  | 0,586785 | 0,897022695  | 0,311991534  | 1,924604406  |            |                |            |              |              |              |
| 27345     | 0,021681141 | 0,04115972 | 0,209795346 | -1,37158   | 4,815290377  | 6,186870371  | 0,054141 | -0,775159507 | 0,944635594  | 0,009297152  | KCNMB4     | nnel subfa     | in-coding  | th           | protein      | G00000135643 |
| 22852     | 0,030227767 | 0,04118396 | 0,209832529 | -0,678507  | 7,375951085  | 8,054457723  | 0,235919 | -0,498502933 | 0,827961646  | -0,056058406 | ANKRD26    | repeat do      | in-coding  | th           | protein      | G00000107890 |
| 7766      | 0,043404917 | 0,04127749 | 0,209877394 | -0,706812  | 5,682454815  | 6,389266682  | 0,218324 | -0,304495613 | 0,85116985   | 0,039550709  | ZNF223     | nger prote     | in-coding  | th           | protein      | G00000178386 |
| 440519    | 0,014816813 | 0,04128346 | 0,209821604 | -1,004792  | 7,413670607  | 8,418462623  | 0,007208 | -0,934016496 | 0,436478869  | 0,227410021  | ZNF724     | nger prote     | other      | unknown      | G00000196081 |              |
| 375189    | 0,029345121 | 0,04140587 | 0,210185039 | 0,5262305  | 5,825595094  | 5,299364642  | 0,415311 | 0,103030384  | 0,018441921  | 0,50756463   | PFN4       | family me      | in-coding  | th           | protein      | G00000176732 |
| 285596    | 0,043862464 | 0,04148567 | 0,210245434 | 0,8211836  | 4,6156882026 | 4,6156882026 | 0,136626 | 0,552872801  | 0,662062546  | -0,147272495 | FAM153A    | nce similar    | in-coding  | th           | protein      | G00000170074 |
| 54361     | 0,032848564 | 0,04152807 | 0,21037427  | 0,979992   | 4,816512632  | 3,836520615  | 0,23717  | -0,256986191 | 0,1839898281 | 0,49611902   | WNT4       | family mer     | in-coding  | th           | protein      | G00000162552 |
| 645010    | 0,044907298 | 0,04154725 | 0,210299404 | 0,6794179  | 4,629692755  | 3,950274806  | 0,290571 | 0,535535364  | 0,296595271  | 0,245246044  |            |                |            |              |              |              |
| 220074    | 0,015521301 | 0,04156133 | 0,210284719 | -0,708319  | 5,33115391   | 6,03947313   | 0,298087 | -0,368649454 | 0,114676418  | -0,329748322 | LRTOMT     | d O-methy      | in-coding  | th           | protein      | G00000184154 |
| 23683     | 0,022527767 | 0,04156647 | 0,210139048 | -0,694234  | 7,238268986  | 7,9325032    | 0,038118 | -0,708701871 | 0,298004116  | 0,234823129  | PRKD3      | tein kinase    | in-coding  | th           | protein      | G00000115825 |
| 4440      | 0,015404666 | 0,04167872 | 0,210277383 | 0,6932738  | 6,450914774  | 5,757640979  | 0,176986 | 0,436870902  | 0,751036614  | -0,070798578 | M51        | NA binding     | in-coding  | th           | protein      | G00000135097 |
| 2038      | 0,042655497 | 0,04171497 | 0,210117904 | 0,7067579  | 4,770890382  | 4,064132501  | 0,455709 | 0,052852522  | 0,024963435  | 0,804775258  | EPB42      | mbra           | in-coding  | th           | protein      | G00000166947 |
| 51651     | 0,030421547 | 0,04175732 | 0,210245732 | 0,6827259  | 14,71302626  | 14,03030037  | 0,075029 | 0,44308225   | 0,087248426  | 0,411611971  | PTRH2      | l-tRNA hyd     | in-coding  | th           | protein      | G00000141378 |
| 7098      | 0,02913687  | 0,0418099  | 0,210339492 | -1,208574  | 4,932714253  | 6,14128864   | 0,441386 | -0,273207825 | 0,082998485  | -0,933440091 | TLR3       | like recept    | in-coding  | th           | protein      | G00000164342 |
| 392490    | 0,013742725 | 0,04181499 | 0,210279649 | 1,4865498  | 9,542050741  | 8,055500982  | 0,26169  | 0,733571555  | 0,495191226  | -0,035879982 |            |                |            |              |              |              |
| 134510    | 0,014170392 | 0,04184113 | 0,210325724 | 0,6607901  | 7,829383236  | 7,168593157  | 0,012371 | 0,275356513  | 0,233112656  | 0,239676408  | UBLCP1     | containing     | in-coding  | th           | protein      | G00000164332 |
| 3897      | 0,045180612 | 0,04186374 | 0,210354007 | -0,698468  | 8,551275962  | 7,852807676  | 0,070131 | -0,498890105 | 0,193568549  | -0,311574094 | L1CAM      | hesion         | in-coding  | th           | protein      | G00000198910 |
| 84707     | 0,041652303 | 0,04189946 | 0,210448102 | 0,9412666  | 10,92022776  | 9,978961158  | 0,135964 | 0,52357831   | 0,053394727  | 0,640907664  | BEX2       | ressed X-      | in-coding  | th           | protein      | G00000131314 |
| 5648      | 0,016081508 | 0,0419269  | 0,210330073 | 0,5932133  | 4,594561588  | 4,001348296  | 0,028239 | 1,026689203  | 0,142559821  | -0,523769299 | MASP1      | g lectin       | in-coding  | th           | protein      | G00000127241 |
| 114796    | 0,02891383  | 0,0419297  | 0,210173862 | -0,639001  | 6,792333251  | 7,431333956  | 0,159518 | -0,317708304 | 0,635926577  | -0,050616406 | PSMG3-AS   | hse RNA 1      | in-coding  | Rlong non-   | G00000230487 |              |
| 100131129 | 0,014529483 | 0,04214734 | 0,210753063 | 3,5084233  | 4,278512481  | 0,770089134  | 0,131185 | 1,356795562  | 0,141421914  | 1,721360095  |            |                |            |              |              |              |
| 284185    | 0,045465571 | 0,04220805 | 0,210886359 | 0,6954414  | 7,641048641  | 6,945607206  | 0,091142 | 0,476958201  | 0,149240805  | 0,355444592  | LINC00482  | on-protein     | in-coding  | Rlong non-   | G00000185168 |              |
| 157378    | 0,024792118 | 0,04227303 | 0,211040729 | -0,880485  | 7,8184494    | 6,89893417   | 0,004824 | -0,363086361 | 0,81960285   | -0,024784151 | TMEM65     | mbra           | in-coding  | th           | protein      | G00000164983 |
| 449520    | 0,043181857 | 0,04244213 | 0,211714255 | 0,7254118  | 5,373110128  | 4,647698333  | 0,151037 | 0,512119611  | 0,89235866   | 0,027046381  | GGNBP1     | iding prote    | in-coding  | th           | protein      | G00000204188 |
| 440518    | 0,013376221 | 0,04246223 | 0,211644054 | 0,5877494  | 5,667651375  | 5,079902009  | 0,254864 | 0,396254581  | 0,75950053   | 0,080401259  | GOLGA2P9A2 | pseudoseudogen | in-coding  | th           | protein      | G00000269332 |
| 138151    | 0,030006704 | 0,0425486  | 0,211904038 | 0,698068   | 8,455104495  | 7,757036486  | 0,011875 | 0,347489444  | 0,147913598  | 0,400718188  | NACC2      | family mer     | in-coding  | th           | protein      | G00000148411 |
| 8089      | 0,026623508 | 0,04257907 | 0,211885376 | -0,692849  | 9,015632901  | 9,708482184  | 0,25056  | -0,334193016 | 0,576244189  | 0,077465195  | YEATS4     | omain cont     | in-coding  | th           | protein      | G00000127337 |
| 6288      | 0,026808441 | 0,04258136 | 0,211811654 | -0,591554  | 8,559639641  | 9,151193595  | 0,95599  | 0,007107504  | 0,019799964  | 0,434647359  | SAA1       | im amylo       | in-coding  | th           | protein      | G00000173432 |
| 55669     | 0,026949787 | 0,0426571  | 0,212018098 | -0,675763  | 7,657751259  | 8,33351409   | 0,287379 | -0,384297164 | 0,837721886  | -0,040431841 | MFN1       | mitofusin      | in-coding  | th           | protein      | G00000171109 |
| 27033     | 0,01522801  | 0,04270707 | 0,212181339 | 0,6117343  | 5,997078986  | 5,38534464   | 0,324169 | 0,329328839  | 0,916899174  | 0,025052603  | ZBTB32     | BTB domain     | in-coding  | th           | protein      | G0000011590  |
| 100130934 | 0,031567085 | 0,04289229 | 0,2127602   | 0,7272089  | 4,433515431  | 3,706306543  | 0,201645 | 0,634873461  | 0,842272708  | 0,04869706   | ZNF663P    | rotein 663,    | in-coding  | th           | protein      | G00000215452 |
| 643529    | 0,025031212 | 0,04290973 | 0,212761509 | 0,5193642  | 5,188859367  | 4,669495186  | 0,168174 | 0,896488234  | 0,701020037  | -0,198416706 | LINC00865  | on-protein     | in-coding  | Rlong non-   | G00000232229 |              |
| 148741    | 0,017186432 | 0,04298088 | 0,213029026 | 1,2952736  | 4,108786428  | 2,813512871  | 0,563796 | 0,2323044    | 0,190788312  | 0,640779556  | ANKRD35    | repeat do      | in-coding  | th           | protein      | G00000198483 |
| 25924     | 0,038492629 | 0,04327291 | 0,214048148 | 0,6171593  | 4,678056775  | 4,06089748   | 0,859515 | 0,055325938  | 0,575513236  | 0,189256612  | MYRIP      | id Rab inte    | in-coding  | th           | protein      | G00000170011 |
| 387266    | 0,016489262 | 0,04329696 | 0,213996164 | -0,2022926 | 4,815393542  | 6,838319288  | 0,134688 | -1,247195672 | 0,164395613  | -0,40287253  | KRTAP5-3   | sociated       | in-coding  | th           | protein      | G00000196224 |
| 6525      | 0,027392013 | 0,0433009  | 0,213930282 | 0,7799774  | 8,102156923  | 7,322179506  | 0,120691 | 0,364582545  | 0,130665353  | 0,469277561  | SMTN       | smoothel       | in-coding  | th           | protein      | G00000183963 |
| 420       | 0,045562666 | 0,04340041 | 0,214165666 | -0,956837  | 2,957648378  | 3,914485747  | 0,43413  | -0,232984191 | 0,591049375  | -0,185227728 | ART4       | ase 4 (Dor     | in-coding  | th           | protein      | G00000111339 |
| 246122    | 0,018487922 | 0,04356699 | 0,2146456   | -2,883699  | 1,333023314  | 4,216722631  | 0,413575 | -0,404351164 | 0,190922176  | -0,712381534 | TTY7       | it, Y-linked   | in-coding  | Rlong non-   | G00000147753 |              |
| 4111      | 0,026769135 | 0,04357861 | 0,214617453 | 1,970791   | 4,954860132  | 2,984069131  | 0,340567 | 1,743840299  | 0,972405372  | 0,057011117  | MAGEA12    | amily mem      | in-coding  | th           | protein      | G00000213401 |
| 55435     | 0,046571956 | 0,04361816 | 0,214471144 | 0,5253121  | 7,904304441  | 7,378992319  | 0,713312 | -0,113521294 | 0,118661047  | 0,43078977   | AP1AR      | mplex 1        | in-coding  | th           | protein      | G00000138660 |
| 3429      | 0,037331124 | 0,0436289  | 0,214438813 | -0,743497  | 12,4255062   | 13,16900332  | 0,768669 | -0,146250642 | 0,574144863  | -0,236029298 | IFI27      | sha induc      | in-coding  | th           | protein      | G00000165949 |
| 3736      | 0,025873545 | 0,04365308 | 0,214387507 | 1,1844454  | 4,215819308  | 3,031373915  | 0,084284 | 1,094289817  | 0,821243724  | -0,115336924 | KCNA1      | ed channel     | in-coding  | th           | protein      | G00000111262 |
| 462       | 0,023317071 | 0,0437417  | 0,214737614 | 1,0450567  | 4,935700249  | 3,890643593  | 0,150853 | 0,505692013  | 0,063790365  | 0,524901957  | SERPINC1   | amily C        | in-coding  | th           | protein      | G00000117601 |
| 25911     | 0,017673491 | 0,04374996 | 0,21469306  | 0,5498715  | 9,249583274  | 8,699711801  | 0,707283 | 0,056611374  | 0,659466696  | 0,048743471  | DPDC       | ary dysk       | in-coding  | th           | protein      | G00000166171 |
| 164633    | 0,026336117 | 0,04378028 | 0,214756776 | -0,518268  | 4,746201126  | 5,264469512  | 0,377874 | 0,243621118  | 0,071395993  | -0,567101273 | CABP7      | i binding      |            |              |              |              |



|           |             |            |             |            |             |             |          |              |             |              |            |                                                   |
|-----------|-------------|------------|-------------|------------|-------------|-------------|----------|--------------|-------------|--------------|------------|---------------------------------------------------|
| 6737      | 0,039219221 | 0,04384238 | 0,214721244 | -0,508232  | 5,955718325 | 6,463950589 | 0,022602 | -0,359635617 | 0,18361376  | -0,171532398 | TRIM21     | motif contain-coding, th protein G00000132109     |
| 653712    | 0,047137314 | 0,04385648 | 0,214620553 | 1,3504149  | 4,585854564 | 3,235439646 | 0,333514 | 0,611655542  | 0,189300589 | 0,878594554  |            |                                                   |
| 10589     | 0,014064919 | 0,04402273 | 0,214924628 | 0,7131698  | 12,18540849 | 12,18540849 | 0,46396  | 0,099126985  | 0,085607069 | 0,490016126  | DRAP1      | sociated prain-coding, th protein G00000175550    |
| 100169750 | 0,045649641 | 0,04407053 | 0,21498851  | -0,772232  | 5,686968815 | 6,459201254 | 0,063102 | -0,564907966 | 0,157071998 | 0,427729554  | PRINS      | rotein codn-coding Rlong non-coding               |
| 5713      | 0,035359581 | 0,04417026 | 0,215220722 | 0,6395772  | 11,41558114 | 10,77600395 | 0,302721 | 0,195825312  | 0,198533765 | 0,345797447  | PSMD7      | 6S subunit,ain-coding, th protein G00000103035    |
| 388436    | 0,047010033 | 0,0442529  | 0,21528467  | 0,6049236  | 6,110860915 | 5,505937306 | 0,040965 | 0,691038554  | 0,46624204  | -0,167417193 |            |                                                   |
| 8630      | 0,045488085 | 0,04427029 | 0,215284678 | 0,9736148  | 4,871696884 | 3,898082052 | 0,257591 | 0,411066592  | 0,050639624 | 0,962886778  | HSD17B6    | 17-beta dein-coding, th protein G00000025423      |
| 266747    | 0,01977499  | 0,04434469 | 0,215139651 | 0,5016223  | 4,829536997 | 4,327914702 | 0,290831 | 0,353198917  | 0,89543474  | 0,039486272  | RGL4       | de dissociain-coding, th protein G000000159496    |
| 64167     | 0,033178959 | 0,04435766 | 0,215118318 | -0,552644  | 5,861870276 | 6,414514491 | 0,171071 | -0,10052154  | 0,071459839 | -0,253689952 | ERAP2      | ticulum arain-coding, th protein G00000164308     |
| 342       | 0,038501124 | 0,04436791 | 0,215083806 | -0,588223  | 9,208897411 | 9,797120815 | 0,017699 | -0,466487266 | 0,626024357 | 0,094609768  | APOC1P1    | tein C1 pseudeudogenoseudogenG000000214855        |
| 55679     | 0,018575814 | 0,04443172 | 0,215224695 | 0,6127285  | 7,496678809 | 6,883950309 | 0,029645 | 0,281958544  | 0,383283381 | 0,161755154  | LIMS2      | er domain ain-coding, th protein G00000072163     |
| 196403    | 0,047658835 | 0,04448961 | 0,215168512 | 0,5203886  | 6,193041977 | 5,672653372 | 0,035829 | 0,210003843  | 0,478772085 | 0,110430729  | DTX3       | 3 ubiquitinain-coding, th protein G00000178498    |
| 1992      | 0,033676998 | 0,04459104 | 0,215406709 | -0,629368  | 10,86950771 | 11,49887572 | 0,389584 | -0,122000867 | 0,11777358  | -0,41222232  | SERPINB1   | amily B meain-coding, th protein G00000021355     |
| 100131096 | 0,035915222 | 0,0446354  | 0,215452952 | -1,074583  | 6,372641488 | 7,44722437  | 0,357725 | -0,252920898 | 0,107361239 | -0,44816983  | NRC6C-ASC  | antisensen-coding Rlong non-cG000000204282        |
| 5978      | 0,037777784 | 0,04464403 | 0,215410671 | -0,99476   | 7,554648101 | 8,549440834 | 0,169479 | -0,514375543 | 0,303578035 | -0,25174366  | REST       | g transcriptain-coding, th protein G00000084093   |
| 7791      | 0,027871425 | 0,04467025 | 0,215453266 | 0,6153841  | 10,0512495  | 9,435858892 | 0,522174 | 0,121403368  | 0,307151461 | 0,215535217  | ZYX        | zyxin ain-coding, th protein G00000159840         |
| 83853     | 0,047920424 | 0,04484054 | 0,215854341 | -0,701317  | 3,882053672 | 4,583730274 | 0,424558 | -0,337318327 | 0,183435591 | 0,485632663  | ROPN1L     | ociated tail ain-coding, th protein G00000145491  |
| 81696     | 0,045729821 | 0,04490021 | 0,216057602 | -0,666354  | 3,614804569 | 4,281159035 | 0,84047  | 0,142856572  | 0,220968471 | -0,653087626 | OR5V1      | amily 5 sultain-coding, th protein G00000243729   |
| 4360      | 0,047870623 | 0,04490123 | 0,215978582 | 1,543384   | 2,266395013 | 0,723010982 | 0,125559 | 1,35260438   | 0,608481759 | 0,329704735  | MRC1       | receptor, ain-coding, th protein G00000260314     |
| 2554      | 0,019641785 | 0,04493107 | 0,215954408 | 0,6431721  | 3,953932106 | 3,310760049 | 0,039743 | 1,027788379  | 0,728258702 | -0,115118774 | GABRA1     | cid type A ain-coding, th protein G00000022355    |
| 9046      | 0,046620714 | 0,04493504 | 0,215889713 | 0,5663834  | 5,236863977 | 4,670480607 | 0,384354 | 0,159949417  | 0,399467992 | 0,178039106  | DOK2       | king proteain-coding, th protein G000000147443    |
| 10389     | 0,033110755 | 0,04497362 | 0,215740315 | 0,6884146  | 6,008171526 | 5,31975694  | 0,786677 | 0,077572387  | 0,663601548 | 0,092701715  | SCML2      | midleg-like ain-coding, th protein G00000102098   |
| 4858      | 0,034114237 | 0,04502488 | 0,215735533 | 0,5059852  | 6,825355954 | 6,319370798 | 0,085436 | 0,585957754  | 0,679319405 | -0,063546834 | NOVA2      | tive spliciain-coding, th protein G00000104967    |
| 80864     | 0,019410213 | 0,04503664 | 0,215708431 | 0,5315531  | 10,3721438  | 9,840590737 | 0,001916 | 0,521421202  | 0,245912357 | 0,20252478   | EGFL8      | domain main-coding, th protein G00000241404       |
| 54512     | 0,01566238  | 0,0450889  | 0,215791864 | 0,5226523  | 10,77217946 | 10,24952719 | 0,201734 | 0,153760755  | 0,361971011 | 0,1392975    | EXOSC4     | me compoain-coding, th protein G00000178896       |
| 6990      | 0,037145988 | 0,04509074 | 0,21571732  | 0,5687515  | 9,014091927 | 8,445340453 | 0,053913 | 0,465230782  | 0,734612269 | 0,060220492  | DYNLT3     | ht chain Tcain-coding, th protein G00000165169    |
| 22920     | 0,037650755 | 0,04518665 | 0,215842687 | -0,635971  | 6,57869921  | 7,214670427 | 0,07056  | -0,49414814  | 0,46817965  | -0,178044542 | KIFAP3     | ssociated peain-coding, th protein G00000075945   |
| 1595      | 0,023741958 | 0,04531823 | 0,216054586 | 0,6501265  | 11,52131405 | 10,87118753 | 0,454792 | 0,271120543  | 0,457814035 | -0,167397468 | CYP51A1    | imily 51 sultain-coding, th protein G00000001630  |
| 374897    | 0,014266579 | 0,04532026 | 0,21598112  | 0,5030456  | 6,111138671 | 5,608093114 | 0,062416 | 0,452252564  | 0,726827722 | -0,066166584 | SBSN       | suprabasain-coding, th protein G00000189001       |
| 100128885 | 0,042225027 | 0,04539667 | 0,216178912 | -2,510864  | 6,08328285  | 3,194146988 | 0,213119 | -1,384149161 | 0,128970162 | -1,809997827 |            |                                                   |
| 29926     | 0,044469488 | 0,0456003  | 0,216731991 | 0,5956955  | 9,46351223  | 8,867816698 | 0,054527 | 0,454549782  | 0,289395472 | 0,232327971  | GMPPA      | se pyrophoain-coding, th protein G00000144591     |
| 8507      | 0,022879065 | 0,0456722  | 0,216824114 | -0,613221  | 9,712452044 | 10,3256732  | 0,135836 | -0,210540898 | 0,126002344 | -0,36325961  | ENC1       | mal-neural ain-coding, th protein G000000171617   |
| 285943    | 0,029574497 | 0,04571825 | 0,216959564 | 1,07890321 | 5,48978461  | 6,427881745 | 0,774175 | 0,16436279   | 0,032759919 | 0,625993149  | HOXA-AS2   | ster antisem-coding Rlong non-cG00000253552       |
| 56938     | 0,046382383 | 0,04577082 | 0,217042732 | -0,598526  | 7,480901907 | 8,079428288 | 0,07083  | -0,576327581 | 0,02855789  | 0,554225013  | ARNTL2     | eptor nucleain-coding, th protein G00000029153    |
| 80221     | 0,015558565 | 0,04585005 | 0,217168991 | -0,522473  | 6,83166783  | 7,354140622 | 0,115467 | -0,294305187 | 0,295454916 | -0,164869865 | ACSF2      | hetase farain-coding, th protein G00000167107     |
| 84944     | 0,046116678 | 0,04590174 | 0,217247672 | -0,68141   | 5,387034458 | 6,068444376 | 0,147936 | -0,202368426 | 0,173517501 | -0,289641287 | MAEL       | atogenic train-coding, th protein G00000143194    |
| 55359     | 0,015356761 | 0,0459269  | 0,217283725 | -0,67407   | 4,842935074 | 5,517005241 | 0,373555 | -0,26612385  | 0,560253665 | -0,109904289 | STYK1      | onine/tyrosain-coding, th protein G00000060140    |
| 5300      | 0,038222638 | 0,04594911 | 0,21730579  | 0,522893   | 10,35516796 | 9,832274971 | 0,117171 | 0,219987727  | 0,528988647 | -0,116363121 | PIN1       | is isomerasain-coding, th protein G000000127445   |
| 7075      | 0,048573121 | 0,0460596  | 0,217662098 | 0,553735   | 4,879888217 | 4,326153245 | 0,114006 | 0,558269177  | 0,633936209 | 0,102479106  | TIE1       | oglobulin ain-coding, th protein G00000066056     |
| 9562      | 0,018124256 | 0,04611399 | 0,217752998 | -0,557733  | 7,381313636 | 7,939046953 | 0,046483 | -0,301673211 | 0,725524438 | 0,05809496   | MINPP1     | olyphosphain-coding, th protein G00000107789      |
| 257019    | 0,042617653 | 0,04613922 | 0,217623222 | -0,514542  | 5,059059911 | 5,573601953 | 0,786184 | 0,073834975  | 0,223405189 | -0,403890515 | FRMD3      | omain contain-coding, th protein G00000172159     |
| 391       | 0,038694313 | 0,04617426 | 0,217622733 | 0,5252157  | 10,68939692 | 10,16418119 | 0,527161 | 0,149093395  | 0,452460676 | 0,147020043  | RHOG       | og family rain-coding, th protein G00000177105    |
| 574036    | 0,04731006  | 0,0461778  | 0,217556644 | 0,5933968  | 8,505342801 | 7,911945976 | 0,100611 | 0,53855021   | 0,511539794 | 0,183985486  | ERTAD4-AS4 | antisensin-coding Rlong non-cG000000203706        |
| 162073    | 0,024800939 | 0,04622397 | 0,217691366 | -1,078724  | 9,603177285 | 10,68190152 | 0,300117 | -0,439950614 | 0,10280402  | -0,257126582 | ITPR1PL2   | te receptoain-coding, th protein G00000205730     |
| 23508     | 0,028797138 | 0,04623697 | 0,217669828 | 0,5195568  | 5,150553116 | 4,630996309 | 0,380093 | -0,20200305  | 0,065961201 | 0,43613568   | TC9        | ptide repeain-coding, th protein G00000133985     |
| 1830      | 0,033142816 | 0,0462483  | 0,217640413 | 0,6304495  | 4,619446934 | 3,988997435 | 0,191292 | 0,80749239   | 0,899024091 | 0,063030112  | DSG3       | esmoglein ain-coding, th protein G00000134757     |
| 9282      | 0,015736306 | 0,04625114 | 0,217571129 | -0,731276  | 8,535643972 | 9,26692005  | 0,066544 | -0,284537541 | 0,316606108 | -0,225248386 | MED14      | complex sein-coding, th protein G000000180182     |
| 641928    | 0,016987413 | 0,04626454 | 0,217551558 | -1,52056   | 4,115848199 | 5,636408649 | 0,022    | -0,909805715 | 0,64310928  | -0,203601201 |            |                                                   |
| 145497    | 0,03961465  | 0,04629619 | 0,217535176 | 0,6674518  | 4,400850483 | 3,73339864  | 0,469789 | 0,210393995  | 0,062040498 | 0,364110006  | LRRC74A    | repeat corain-coding, th protein G00000100565     |
| 400682    | 0,047959728 | 0,04629711 | 0,217457015 | -0,627778  | 4,190200778 | 4,817979025 | 0,640312 | 0,366869559  | 0,473212094 | -0,581487876 |            |                                                   |
| 64838     | 0,046573502 | 0,04630512 | 0,21741221  | -0,749285  | 7,301764183 | 8,051048752 | 0,173591 | -0,405010719 | 0,648945038 | 0,115722121  | FNDC4      | se III domain-coding, th protein G00000115226     |
| 79094     | 0,022445774 | 0,0463242  | 0,217419347 | 0,726088   | 7,184842997 | 6,458755005 | 0,120818 | 0,393689577  | 0,132135124 | -0,443211803 | CHAC1      | gamma-glain-coding, th protein G000000128965      |
| 115708    | 0,042237335 | 0,04644582 | 0,217660268 | 0,5353029  | 8,272391338 | 7,737088417 | 0,293132 | 0,200321743  | 0,704460846 | 0,079033289  | TRMT61A    | thyltransfeain-coding, th protein G00000166166    |
| 150221    | 0,049184959 | 0,04649098 | 0,21778952  | 0,9883955  | 5,704570964 | 4,71617549  | 0,905156 | 0,06244074   | 0,290717999 | 0,483815644  | RIMBP3C    | inding proteain-coding, th protein G00000183246   |
| 56654     | 0,025260743 | 0,04663578 | 0,218055452 | 0,8705082  | 9,724830683 | 8,854322527 | 0,375301 | 0,201362108  | 0,138116702 | 0,515389609  | NPDC1      | v, differentiaain-coding, th protein G00000107281 |
| 22870     | 0,017323558 | 0,0467005  | 0,218111047 | 0,8257243  | 9,128409977 | 8,302685679 | 0,00655  | 0,235451218  | 0,166668161 | 0,403461025  | PPP6R1     | itase 6 regain-coding, th protein G00000105063    |
| 389643    | 0,024709225 | 0,0467026  | 0,218038651 | 0,6250451  | 5,060741103 | 4,435666021 | 0,175054 | 0,302332994  | 0,392226536 | 0,171759213  | NUGGC      | germinal cein-coding, th protein G00000189233     |
| 90141     | 0,028633759 | 0,04675787 | 0,218132274 | 0,5241398  | 9,226487723 | 8,702347963 | 0,173692 | 0,182602852  | 0,993852221 | -0,012377024 | EFCAB11    | ium bindinain-coding, th protein G00000140025     |
| 7542      | 0,020323279 | 0,04689323 | 0,218352512 | 0,7642149  | 9,634040748 | 8,869825865 | 0,047957 | 0,413151657  | 0,500561379 | 0,164143729  | ZFPL1      | ger proteain-coding, th protein G00000162300      |

|           |             |            |             |           |             |             |          |              |             |              |           |                                                  |
|-----------|-------------|------------|-------------|-----------|-------------|-------------|----------|--------------|-------------|--------------|-----------|--------------------------------------------------|
| 4072      | 0,044903103 | 0,04692836 | 0,218188003 | -0,51195  | 7,699084545 | 8,211034901 | 0,200002 | -0,1322461   | 0,125856255 | -0,341657198 | EPCAM     | ell adhesion coding, th protein G00000119888     |
| 4620      | 0,048136898 | 0,04696813 | 0,218290957 | 0,6691592 | 4,117902311 | 3,448743101 | 0,104368 | 0,504618547  | 0,280515157 | 0,215611858  | MYH2      | in heavy chain coding, th protein G00000125414   |
| 9865      | 0,050147446 | 0,04715722 | 0,218759359 | 1,8450237 | 4,548565444 | 2,703541695 | 0,271399 | 1,81899232   | 0,852216747 | 0,268522693  | TRIL      | r with leucine coding, th protein G0000025690    |
| 388650    | 0,031436089 | 0,04724793 | 0,21893415  | 0,5298873 | 7,841308675 | 7,311421419 | 0,318351 | 0,130662467  | 0,27591649  | 0,21370404   | FAM69A    | ence similaein coding, th protein G00000154511   |
| 6947      | 0,049411334 | 0,04725377 | 0,218797497 | -0,887046 | 4,173287366 | 5,060333791 | 0,407122 | -0,218560121 | 0,473037177 | -0,24826717  | TCN1      | nscobalamine coding, th protein G00000134827     |
| 92552     | 0,019149544 | 0,04725878 | 0,218738951 | -1,864805 | 2,575324892 | 4,44012996  | 0,086977 | -2,178866859 | 0,918997485 | -0,097564138 | ATXN3L    | staxin 3 likein coding, th protein G00000123594  |
| 5163      | 0,040838245 | 0,04737745 | 0,219124454 | -0,634693 | 9,07329685  | 9,707989739 | 0,109089 | -0,28802909  | 0,191366597 | -0,338630693 | PDK1      | hydrogenaein coding, th protein G00000152256     |
| 57823     | 0,037375905 | 0,04741334 | 0,21904502  | -0,52081  | 5,773009196 | 6,293818908 | 0,993717 | 0,001788643  | 0,137149231 | -0,343964866 | SLAMF7    | family mersin coding, th protein G00000026751    |
| 100129373 | 0,045621107 | 0,04748912 | 0,218986717 | -0,973822 | 3,882696133 | 4,856518262 | 0,086838 | -1,570393734 | 0,599353038 | -0,29009435  |           |                                                  |
| 55509     | 0,030591467 | 0,04760976 | 0,2193797   | 0,5107392 | 8,619059544 | 8,108320305 | 0,088686 | 0,163767825  | 0,05803715  | 0,499716684  | BATF3     | ATF-like train coding, th protein G00000123685   |
| 91752     | 0,036826208 | 0,04763941 | 0,219353114 | 0,5243737 | 6,305427067 | 5,781053381 | 0,067523 | 0,390738517  | 0,625850531 | -0,090478771 | ZNF804A   | iger proteinein coding, th protein G00000170396  |
| 6581      | 0,02963896  | 0,04768293 | 0,219390373 | 0,5643002 | 6,632147562 | 6,067847349 | 0,138951 | 0,293848827  | 0,017324863 | 0,453428149  | SLC22A3   | er family 2:ain coding, th protein G00000146477  |
| 341152    | 0,040904614 | 0,04769676 | 0,219291071 | 0,6959732 | 6,097419666 | 5,401446423 | 0,033852 | 0,76693437   | 0,531208158 | -0,160869017 | ORZAT4    | imily 2 subein coding, th protein G00000171561   |
| 374355    | 0,043725305 | 0,04771754 | 0,219142597 | 1,5637587 | 1,997634923 | 0,433876205 | 0,195546 | 1,333021022  | 0,422649731 | -0,433876205 | CCDC172   | omain corain coding, th protein G00000182645     |
| 645104    | 0,039350554 | 0,04785458 | 0,219121975 | 0,6868925 | 5,059523953 | 4,372541448 | 0,618767 | 0,300910938  | 0,662782688 | 0,202789656  | CLRN2     | clarin 2 ain coding, th protein G00000249581     |
| 157777    | 0,01603878  | 0,04786264 | 0,219077912 | -2,141292 | 0,97799087  | 3,121082947 | 0,921624 | -0,06103126  | 0,388859749 | -0,58700926  | MCMDC2    | intenanceein coding, th protein G00000178460     |
| 182       | 0,040919122 | 0,04795368 | 0,219170628 | 0,5668733 | 7,316647203 | 6,749773929 | 0,333181 | 0,160477647  | 0,694704255 | 0,04992774   | JAG1      | jagged 1 ain coding, th protein G00000101384     |
| 54551     | 0,025561131 | 0,0479955  | 0,219280865 | -3,236316 | 0,285562321 | 3,521878231 | 0,247398 | -2,37432805  | 0,679463235 | -0,772473669 | MAGEL2    | family mersin coding, th protein G00000254585    |
| 79635     | 0,02723269  | 0,04803483 | 0,219217961 | -1,131822 | 4,291858121 | 5,423679741 | 0,189706 | -0,53373798  | 0,608713377 | -0,113624116 | CCDC121   | omain corain coding, th protein G00000176714     |
| 29992     | 0,036989616 | 0,04815773 | 0,219536153 | 0,7611659 | 5,341219729 | 4,580053852 | 0,846829 | 0,068230002  | 0,010590469 | 0,723008291  | PILRA     | bin like typain coding, th protein G00000085514  |
| 6886      | 0,049145516 | 0,04821695 | 0,21964445  | 0,7141897 | 6,330026966 | 5,615837254 | 0,012476 | 0,692097089  | 0,79073697  | -0,060629822 | TAL1      | tor 1, erythrin coding, th protein G00000162367  |
| 54464     | 0,029829656 | 0,04821932 | 0,219574501 | -0,638972 | 7,150444274 | 7,789415789 | 0,089979 | -0,257327635 | 0,405243737 | -0,18531273  | XRN1      | xoribonuclein coding, th protein G00000114127    |
| 2535      | 0,020898463 | 0,04822841 | 0,219535155 | 0,5421161 | 11,3903159  | 10,8481998  | 0,392743 | 0,171831139  | 0,088574723 | 0,44231525   | FZD2      | d class receein coding, th protein G00000180340  |
| 100128893 | 0,036124945 | 0,04836118 | 0,21973574  | -1,118312 | 5,08859256  | 6,206904933 | 0,301643 | -0,40790474  | 0,08414956  | -0,46551054  | GATA6-AS1 | se RNA 1 (n-coding R)long non-cG00000266010      |
| 1747      | 0,041668764 | 0,04836904 | 0,219529856 | 0,5851606 | 5,585520073 | 5,000359481 | 0,519145 | 0,326417024  | 0,541907047 | -0,120732219 | DLX3      | less homeein coding, th protein G00000064195     |
| 151827    | 0,048016808 | 0,04841811 | 0,219591634 | -0,952814 | 4,644377153 | 5,597190934 | 0,186488 | -0,671511367 | 0,332608434 | 0,25488968   | LRRC34    | r repeat coein coding, th protein G00000171573   |
| 6557      | 0,038370001 | 0,04843797 | 0,21952097  | 1,1312799 | 3,499309775 | 2,368029834 | 0,149308 | 0,736035525  | 0,939808817 | 0,297974753  | SLC12A1   | er family 1:ain coding, th protein G000000074803 |
| 11047     | 0,024491624 | 0,0484584  | 0,219533205 | 0,518056  | 10,91911606 | 10,40106009 | 0,935883 | -0,012466035 | 0,284014337 | 0,190394222  | ADRM1     | egulating rein coding, th protein G00000130706   |
| 51016     | 0,028193659 | 0,0484911  | 0,21960106  | 0,5021297 | 10,38803894 | 9,885909209 | 0,145097 | 0,24637628   | 0,119173938 | 0,34090401   | EMC9      | protein corain coding, th protein G00000100908   |
| 100381270 | 0,043660486 | 0,04853602 | 0,219643845 | 0,5193732 | 10,72941955 | 10,21000463 | 0,240882 | 0,550068713  | 0,403214778 | -0,19089265  | ZBED6     | BED-type ein coding, th protein G00000257315     |
| 400451    | 0,022904631 | 0,04854344 | 0,219597194 | -0,725619 | 6,423444198 | 7,149062721 | 0,092194 | -0,744001329 | 0,76097941  | -0,03804346  | FAM174B   | nce similaein coding, th protein G00000185442    |
| 119694    | 0,015861749 | 0,04857567 | 0,219582583 | -3,079195 | 0           | 3,079195315 | 0,620428 | -0,86965301  | 0,77477251  | -0,464785784 | OR51F2    | imily 51 suain coding, th protein G00000176925   |
| 89927     | 0,051414366 | 0,04862627 | 0,219654292 | 0,6604136 | 7,582375094 | 6,92196154  | 0,605427 | 0,520003128  | 0,221341165 | -0,332783421 | C16orf45  | L6 open reain coding, th protein G00000166780    |
| 100170841 | 0,034003602 | 0,04863023 | 0,219588831 | 0,6806541 | 11,8281197  | 11,14746563 | 0,059812 | 0,351436585  | 0,133541838 | 0,428119844  | C17orf96  | L7 open reain coding, th protein G00000273604    |
| 10780     | 0,048635569 | 0,04863066 | 0,219510732 | -0,543511 | 6,265605573 | 6,809116906 | 0,092184 | -0,233611167 | 0,524752874 | -0,098709593 | ZNF234    | nger proteein coding, th protein G00000263002    |
| 85289     | 0,015939783 | 0,04868899 | 0,219534011 | 2,9051945 | 2,905194464 | 0           | 0,260249 | 1,496455098  | 0,184122311 | 1,938735073  | KRTAP4-5  | sociated pain coding, th protein G000002198271   |
| 389073    | 0,051511633 | 0,04870106 | 0,219428651 | -1,189635 | 2,377511084 | 3,567145651 | 0,538673 | -0,88926455  | 0,524363842 | -0,279007182 | C2orf80   | 2 open reain coding, th protein G000000188674    |
| 441268    | 0,01788091  | 0,04871333 | 0,219324374 | 0,9158629 | 6,865909359 | 5,950046468 | 0,033447 | 0,31179495   | 0,207701011 | 0,386688274  |           |                                                  |
| 78986     | 0,039846168 | 0,04875295 | 0,219423    | 0,6277434 | 6,277595776 | 5,649852341 | 0,084233 | 0,614232741  | 0,988628597 | 0,002853245  | DUSP26    | phosphataein coding, th protein G00000133878     |
| 3087      | 0,023544876 | 0,04883858 | 0,219489371 | -0,90943  | 5,951201322 | 6,860631118 | 0,051703 | -0,723876857 | 0,12577014  | 0,268181921  | HHEX      | ally expresain coding, th protein G00000152804   |
| 147906    | 0,022251878 | 0,0488617  | 0,219434036 | 0,6650094 | 6,300579086 | 5,635569651 | 0,147579 | 0,345309338  | 0,55379506  | 0,112873815  | DACT3     | g antagonistin coding, th protein G00000197380   |
| 27071     | 0,030885128 | 0,04888121 | 0,219442087 | 1,3867238 | 3,641737887 | 2,255014102 | 0,589888 | 0,347469005  | 0,319467204 | 0,561978505  | DAPP1     | tyrosine arain coding, th protein G00000070190   |
| 51642     | 0,044809265 | 0,04888674 | 0,219387393 | -0,502077 | 8,111235919 | 8,613312704 | 0,216164 | -0,218436587 | 0,230730643 | -0,183717474 | MRPL48    | il ribosomeain coding, th protein G00000175581   |
| 55763     | 0,030698113 | 0,04901581 | 0,219807337 | -0,505352 | 7,767102783 | 8,272454971 | 0,117502 | -0,130210157 | 0,598887775 | -0,086353255 | EXOC1     | mplex coain coding, th protein G00000090989      |
| 400954    | 0,039574941 | 0,04904216 | 0,219766379 | 0,5436846 | 5,502117073 | 4,958432515 | 0,644177 | 0,112659268  | 0,013536934 | 0,861050417  | EMLE6     | ubule assoein coding, th protein G00000214595    |
| 55848     | 0,0382002   | 0,04906659 | 0,219637474 | -0,580251 | 7,600748625 | 8,180999605 | 0,143366 | -0,208941142 | 0,625000471 | 0,055452744  | PLGRKT    | ptor with ain coding, th protein G00000107020    |
| 8638      | 0,017449646 | 0,04908621 | 0,219645923 | 0,7205771 | 6,623921986 | 5,903344841 | 0,002069 | 0,989888916  | 0,262884532 | -0,261795622 | OASL      | lenylate syain coding, th protein G00000135114   |
| 124222    | 0,050048615 | 0,0491577  | 0,21964837  | -0,572172 | 7,142064459 | 7,71423688  | 0,173626 | -0,407742829 | 0,495536899 | -0,168941951 | PAQR4     | oQ receptein coding, th protein G00000162073     |
| 10321     | 0,039103965 | 0,0491748  | 0,219645575 | -0,800715 | 3,5746973   | 4,338184501 | 0,366904 | -0,341691359 | 0,633752427 | -0,13459161  | CRISP3    | h secretorain coding, th protein G00000096006    |
| 4026      | 0,017100806 | 0,04919901 | 0,219516189 | 0,5987227 | 9,787181002 | 9,188458297 | 0,206973 | 0,163672781  | 0,888979599 | 0,022317448  | LPP       | ferred tranain coding, th protein G00000145012   |
| 4628      | 0,037409207 | 0,04922205 | 0,219460886 | -0,60729  | 7,631169707 | 8,238459929 | 0,006587 | -0,252070663 | 0,817363394 | 0,0445131    | MYH10     | n heavy chain coding, th protein G00000133026    |
| 284900    | 0,030043214 | 0,04924777 | 0,21949656  | 0,5906348 | 6,323139029 | 5,73250422  | 0,164927 | 0,426494883  | 0,890310946 | 0,033273804  | TTC28-AS1 | antisense n-coding R)long non-cG00000235954      |
| 79825     | 0,024548048 | 0,04925198 | 0,219436367 | 0,5478516 | 5,489266381 | 4,941414792 | 0,248608 | 0,504005575  | 0,575170002 | -0,13479507  | EFCC1     | ed-coil domain coding, th protein G00000114654   |
| 10447     | 0,030245845 | 0,04940175 | 0,2197874   | -0,914103 | 10,07712443 | 10,99122746 | 0,059044 | -0,361461407 | 0,926667849 | 0,026869562  | FAM3C     | ence similaein coding, th protein G00000196937   |
| 28951     | 0,021387714 | 0,04943089 | 0,219759164 | 0,5177136 | 9,244816029 | 8,726786051 | 0,001762 | 0,343518011  | 0,126840276 | -0,314380114 | TRIB2     | s pseudokiain coding, th protein G00000071575    |
| 84727     | 0,039640661 | 0,04946386 | 0,219669225 | 0,5689722 | 6,344289844 | 5,775317604 | 0,181098 | 0,166275517  | 0,227037082 | 0,175085209  | SPSB2     | domain arain coding, th protein G00000111671     |
| 50613     | 0,052181602 | 0,04954256 | 0,21978229  | 0,638909  | 5,823397818 | 5,184488796 | 0,367487 | 0,285490452  | 0,309259063 | 0,239415757  | UBQLN3    | ubiquilin 3ain coding, th protein G00000175520   |
| 160418    | 0,042623794 | 0,04954949 | 0,219734338 | 0,5011674 | 8,653922331 | 8,152754971 | 0,155312 | 0,247330773  | 0,461613127 | -0,128253233 | TMTC3     | ratricopepain coding, th protein G00000139324    |
| 147804    | 0,037322592 | 0,0495821  | 0,219800274 | -0,985242 | 10,21474224 | 11,19998429 | 0,030316 | -0,947449122 | 0,978488213 | 0,010114209  | TPM3P9    | sin 3 pseuseudogenseudogenG00000241015           |

|        |             |            |             |           |             |             |          |              |             |              |         |                                                        |
|--------|-------------|------------|-------------|-----------|-------------|-------------|----------|--------------|-------------|--------------|---------|--------------------------------------------------------|
| 953    | 0,047261675 | 0,04959009 | 0,219757013 | 1,4277676 | 1,934924973 | 0,507157386 | 0,371485 | 0,545978737  | 0,184451334 | 0,877059052  | ENTPD1  | ribose diphosphate di- coding, th protein G00000138185 |
| 54981  | 0,043531113 | 0,04968995 | 0,219884866 | -0,57103  | 6,662713493 | 7,233743798 | 0,847854 | -0,04521228  | 0,618317729 | 0,103212261  | NMRK1   | side riboside- coding, th protein G00000106733         |
| 145483 | 0,050757279 | 0,04980881 | 0,219861007 | 0,5406356 | 6,906374676 | 6,365739052 | 0,780505 | 0,084610335  | 0,699172249 | 0,068600733  | FAM161B | nce similar- coding, th protein G00000156050           |
| 112939 | 0,050758802 | 0,04991345 | 0,220087583 | 0,5150444 | 9,627876254 | 9,112831896 | 0,074449 | 0,270899582  | 0,61850784  | 0,088904743  | NACC1   | umbens a- coding, th protein G00000160877              |
| 255403 | 0,016973984 | 0,04996658 | 0,220165103 | -0,64128  | 6,931430117 | 7,572710195 | 0,069911 | -0,369197884 | 0,701206555 | -0,077176558 | ZNF718  | nger prote- coding, th protein G00000250312            |
