# Supplementary material for: Argonaute 2 drives miR-145-5p-dependent gene expression program in breast cancer cells
Source: PubMed Central journal article supplement (PMC6325137; doi:10.1038/s41419-018-1267-5), 2019-01-08
Supplement: 41419_2018_1267_MOESM8_ESM.pdf [file 41419_2018_1267_MOESM8_ESM.pdf]

| entrezID | permutation p | ttest p    | FDR        | log2fold    | mean mimic145 | mean cntrl  | pval(4Vs3) | log2fold(4Vs3) | pval(3Vs1) | log2fold(3Vs1) | gene     |
|----------|---------------|------------|------------|-------------|---------------|-------------|------------|----------------|------------|----------------|----------|
| 58489    | 0,00204856    | 0,00353719 | 0,13078049 | -1,91520241 | 7,492661812   | 9,407864223 | 0,01782642 | -1,521502      | 0,85726417 | -0,0679232     | ABHD17C  |
| 120      | 0,00092521    | 0,0005261  | 0,09725733 | -1,26619313 | 6,974664128   | 8,240857257 | 0,04525323 | -0,4666652     | 0,04881644 | -0,2853258     | ADD3     |
| 164      | 0,00525576    | 0,00318379 | 0,12803349 | -0,6299136  | 7,514048435   | 8,143962036 | 0,07168218 | -0,3947662     | 0,20425781 | 0,13065005     | AP1G1    |
| 51107    | 0,00040038    | 0,0003319  | 0,08221823 | -1,22364305 | 8,402638814   | 9,626281864 | 0,02067643 | -0,6566915     | 0,41410726 | -0,0889987     | APH1A    |
| 160140   | 0,00561259    | 0,02256201 | 0,1827679  | -0,96731588 | 3,91424612    | 4,881562002 | 0,06585915 | -0,3356433     | 0,56839379 | 0,04950839     | C11orf65 |
| 865      | 0,0036634     | 0,01157054 | 0,15748605 | -0,88589664 | 7,919643202   | 8,805539844 | 0,06774889 | -0,4419551     | 0,0972547  | 0,3289785      | CBFB     |
| 55246    | 0,00157314    | 0,00763674 | 0,14895805 | -1,12521756 | 8,713620163   | 9,838837727 | 0,03819783 | -0,4956534     | 0,24777017 | -0,2228947     | CCDC25   |
| 124808   | 0,00172169    | 0,00143052 | 0,11285608 | -1,05331448 | 8,201356479   | 9,254670955 | 0,0677357  | -0,9165815     | 0,12596336 | 0,2438426      | CCDC43   |
| 1021     | 0,00954816    | 0,00813081 | 0,15098639 | -0,57825054 | 8,93227264    | 9,510523176 | 0,03392133 | -0,3859984     | 0,26312626 | 0,13905146     | CDK6     |
| 84984    | 0,01307643    | 0,02978972 | 0,19532783 | -0,62062639 | 6,420887197   | 7,041513591 | 0,3336359  | -0,5522555     | 0,0344319  | 0,20485496     | CEP19    |
| 92675    | 0,00071432    | 0,00068837 | 0,10397774 | -1,83830854 | 8,731795311   | 10,57010385 | 0,00248661 | -1,4429456     | 0,8539363  | -0,0173802     | DTD1     |
| 50848    | 0,00079317    | 0,00469824 | 0,13822364 | -1,24870979 | 6,793348514   | 8,042058305 | 0,01588564 | -0,5067611     | 0,01078713 | -0,772504      | F11R     |
| 10447    | 0,03024585    | 0,04940175 | 0,2197874  | -0,91410303 | 10,07712443   | 10,99122746 | 0,05904377 | -0,3614614     | 0,92666785 | 0,02686956     | FAM3C    |
| 404636   | 0,00062318    | 0,00476941 | 0,1386706  | -1,66049638 | 10,14428931   | 11,80478569 | 0,013813   | -1,9096595     | 0,15420164 | -0,1912143     | FAM45A   |
| 6624     | 0,00634266    | 0,01262033 | 0,15600287 | -1,60528472 | 5,528738673   | 7,134023389 | 0,0335024  | -0,9929808     | 0,16699113 | -0,2776574     | FSCN1    |
| 2764     | 0,00164469    | 0,00279321 | 0,122683   | -1,83816434 | 7,971589552   | 9,809753887 | 0,00092754 | -1,1471969     | 0,60572492 | -0,1166299     | GMFB     |
| 51280    | 0,00114277    | 0,005039   | 0,13993914 | -1,39474848 | 8,660078281   | 10,05482676 | 0,0109621  | -0,5498325     | 0,55052643 | -0,0985288     | GOLM1    |
| 4232     | 0,00259329    | 0,01157624 | 0,15739057 | -0,86926533 | 6,039913331   | 6,909178664 | 0,00250305 | -0,7956611     | 0,07206346 | 0,36187417     | MEST     |
| 64419    | 0,00347022    | 0,00232997 | 0,12125584 | -0,54516701 | 7,503141929   | 8,048308934 | 0,0368784  | -0,1956816     | 0,85816973 | -0,0128762     | MTMR14   |
| 4644     | 0,03245113    | 0,03922249 | 0,20796586 | -0,54879993 | 6,846120668   | 7,3949206   | 0,38099202 | -0,2307837     | 0,30358653 | -0,1933673     | MYO5A    |
| 57447    | 0,0134944     | 0,01952358 | 0,17599584 | -0,64559824 | 5,722167844   | 6,367766086 | 0,1852214  | -0,2204273     | 0,18293568 | -0,1640955     | NDRG2    |
| 4697     | 0,00032009    | 9,6507E-05 | 0,06291199 | -1,23763454 | 12,6425898    | 13,88022434 | 0,00303337 | -0,8652383     | 0,05477939 | -0,2215211     | NDUFA4   |
| 8508     | 0,00643671    | 0,00444599 | 0,13870985 | -0,68463138 | 6,380529134   | 7,065160513 | 0,19912533 | -0,1455082     | 0,14396522 | -0,195199      | NIPSNAP1 |
| 4893     | 0,00362739    | 0,00999522 | 0,15284001 | -0,56767533 | 9,442371994   | 10,01004732 | 0,00087658 | -0,6008029     | 0,15431195 | 0,16278345     | NRAS     |
| 4521     | 0,00423608    | 0,00249    | 0,12190132 | -0,90834419 | 9,502556606   | 10,41090079 | 0,02123045 | -0,557177      | 0,47132392 | 0,08942301     | NUDT1    |
| 5281     | 0,00045266    | 0,00160301 | 0,11543535 | -1,29005588 | 6,897523924   | 8,187579806 | 0,00479165 | -1,0718324     | 0,04599524 | -0,4183814     | PIGF     |
| 5420     | 0,01795956    | 0,01783664 | 0,17020331 | -0,61801369 | 8,994443733   | 9,612457425 | 0,00642346 | -0,5040696     | 0,57297433 | 0,06715902     | PODXL    |
| 5530     | 0,00054371    | 0,00277519 | 0,1254502  | -1,3553487  | 8,657236134   | 10,01258484 | 0,00091747 | -0,8071689     | 0,0110861  | -0,3838394     | PPP3CA   |
| 6772     | 0,00603262    | 0,02205816 | 0,18117469 | -0,61202708 | 8,146640044   | 8,758667122 | 0,44386177 | -0,0998132     | 0,0287661  | -0,4909622     | STAT1    |
| 23075    | 0,00075019    | 0,00568551 | 0,14255151 | -1,41502923 | 7,507609912   | 8,922639145 | 0,00137865 | -1,2558911     | 0,86694295 | -0,0173781     | SWAP70   |
| 56674    | 0,00080744    | 0,00410902 | 0,13608074 | -1,89691805 | 7,068176974   | 8,965095023 | 0,02551351 | -1,1407028     | 0,40471453 | -0,0480991     | TMEM9B   |
| 29766    | 0,00700919    | 0,01515331 | 0,16221981 | -1,40270445 | 9,046821422   | 10,44952587 | 0,00089112 | -1,1807319     | 0,69124923 | -0,1076817     | TMOD3    |
| 7105     | 0,00183341    | 0,00124427 | 0,11249254 | -0,82357108 | 8,974282055   | 9,79785313  | 0,00795775 | -0,3092479     | 0,04809092 | -0,2144014     | TSPAN6   |
| 64854    | 0,01525974    | 0,01391742 | 0,15946398 | -1,06436658 | 6,577127649   | 7,641494228 | 0,06756378 | -0,8423726     | 0,18849532 | 0,2760044      | USP46    |
| 7525     | 0,01799364    | 0,01516219 | 0,1620348  | -0,84244324 | 7,992935304   | 8,835378542 | 0,03589345 | -0,6690982     | 0,21550917 | -0,231723      | YES1     |
| 51441    | 0,00219258    | 0,00749216 | 0,14823899 | -1,28326495 | 8,94205328    | 10,22531823 | 0,00456816 | -0,7308608     | 0,0481604  | -0,5238912     | YTHDF2   |
