# Supplementary material for: Argonaute 2 drives miR-145-5p-dependent gene expression program in breast cancer cells
Source: PubMed Central journal article supplement (PMC6325137; doi:10.1038/s41419-018-1267-5), 2019-01-08
Supplement: 41419_2018_1267_MOESM9_ESM.pdf [file 41419_2018_1267_MOESM9_ESM.pdf]

Pathways enrichment and gene ontology analyses of miR-145-5p-dependent transcripts

Genes modulated with P<0.01 were considered for this analysis

| Category         | Term                                                           | Lost after Ago2 depletion | Count | PValue   | Genes                                                                                                                                                                                                                                                                                       |
|------------------|----------------------------------------------------------------|---------------------------|-------|----------|---------------------------------------------------------------------------------------------------------------------------------------------------------------------------------------------------------------------------------------------------------------------------------------------|
| BIOCARTA         | Sprouty regulation of tyrosine kinase signals                  | NO                        | 4     | 1,29E-02 | MAPK1, CBL, SHC1, SPRY4                                                                                                                                                                                                                                                                     |
| KEGG_PATHWAY     | Mineral absorption                                             | YES                       | 7     | 1,95E-03 | MT1M, HMOX1, MT2A, MT1E, MT1B, MT1X, MT1F                                                                                                                                                                                                                                                   |
| KEGG_PATHWAY     | Antigen processing and presentation                            | YES                       | 7     | 2,23E-02 | HLA-DRB4, HLA-DRB5, IFI30, HLA-DPA1, HLA-DPB1, CD74, HLA-DRA                                                                                                                                                                                                                                |
| KEGG_PATHWAY     | Chemokine signaling pathway                                    | NO                        | 11    | 4,31E-02 | MAPK1, NRAS, CCL20, CXCR6, RAP1B, SHC1, CXCL6, GRK5, GNG4, CCL28, STAT3                                                                                                                                                                                                                     |
| KEGG_PATHWAY     | Cell adhesion molecules (CAMs)                                 | YES                       | 9     | 5,33E-02 | F11R, ITGA6, HLA-DRB4, HLA-DRB5, CD22, HLA-DPA1, HLA-DPB1, CDH4, HLA-DRA                                                                                                                                                                                                                    |
| KEGG_PATHWAY     | Fc gamma R-mediated phagocytosis                               | NO                        | 6     | 9,56E-02 | MAPK1, WASF3, CFL2, ASAP2, ARPC4, PLPP1                                                                                                                                                                                                                                                     |
| GOTERM_BP_DIRECT | Negative regulation of growth                                  | YES                       | 8     | 2,87E-07 | ING4, MT1L, MT1M, MT2A, MT1E, MT1B, MT1X, MT1F                                                                                                                                                                                                                                              |
| GOTERM_BP_DIRECT | Cellular response to zinc ion                                  | YES                       | 7     | 5,95E-06 | MT1L, MT1M, MT2A, MT1E, MT1B, MT1X, MT1F                                                                                                                                                                                                                                                    |
| GOTERM_BP_DIRECT | Interferon-gamma-mediated signaling pathway                    | YES                       | 8     | 2,38E-03 | SP100, MT2A, HLA-DRB4, HLA-DRB5, IFI30, HLA-DPA1, HLA-DPB1, HLA-DRA                                                                                                                                                                                                                         |
| GOTERM_BP_DIRECT | IRE1-mediated unfolded protein response                        | NO                        | 7     | 4,13E-03 | TSPYL2, SYVN1, DNAJB11, TPP1, FKBP14, SHC1, WIPI1                                                                                                                                                                                                                                           |
| GOTERM_BP_DIRECT | Intrinsic apoptotic signaling pathway in response to ER stress | NO                        | 5     | 1,00E-02 | CASP4, TRIB3, APAF1, SELENOK, ITPR1                                                                                                                                                                                                                                                         |
| GOTERM_BP_DIRECT | Dolichyl diphosphate biosynthetic process                      | YES                       | 3     | 1,29E-02 | DHDDS, SRD5A3, DOLK                                                                                                                                                                                                                                                                         |
| GOTERM_BP_DIRECT | Peptidyl-tyrosine dephosphorylation                            | NO                        | 8     | 1,44E-02 | MTMR2, PTPRK, MTMR14, MTMR1, PTPRE, UBASH3B, PTPN14, DUSP22                                                                                                                                                                                                                                 |
| GOTERM_BP_DIRECT | T cell receptor signaling pathway                              | NO                        | 10    | 1,50E-02 | MAPK1, PSMB6, TMEM189-UBE2V1, PSMC4, HLA-DRB4, HLA-DRB5, HLA-DPA1, HLA-DPB1, RFTN1, HLA-DRA, PTPRK, ING4, ENPP7, KAT2B, CGRRF1, BECN1, PTPN14, CDK6, NR2E3, PLPP1, SRF, STAT3, DDR1, EIF2AK1, ADM,                                                                                          |
| GOTERM_BP_DIRECT | Negative regulation of cell proliferation                      | NO                        | 19    | 1,53E-02 | NUPR2, BTG3, RAPGEF2, SMARCA2                                                                                                                                                                                                                                                               |
| GOTERM_BP_DIRECT | Positive regulation of apoptotic process                       | NO                        | 15    | 2,48E-02 | ING4, APH1A, ZAK, ZMAT3, ARHGFE9, STK17A, ITSN1, SLIT2, NCSTN, ITGA6, ADM, HMOX1, IGF2R, DHODH, APAF1                                                                                                                                                                                       |
| GOTERM_BP_DIRECT | Response to drug                                               | YES                       | 15    | 2,73E-02 | BECN1, LGALS1, GNA12, AK4, DPYSL2, ABCA1, AQP1, SRP19, PNP, STAT3, APOD, DHODH, TGFA, PMS2, PTCH1                                                                                                                                                                                           |
| GOTERM_BP_DIRECT | Intracellular protein transport                                | YES                       | 12    | 4,41E-02 | TBC1D2B, AP2B1, SEC24A, STX3, NAPG, AP1G1, TOM1L2, IPO4, CTSA, EVI5L, CD74, ADPRH                                                                                                                                                                                                           |
| GOTERM_BP_DIRECT | Macroautophagy                                                 | NO                        | 6     | 4,72E-02 | ATG10, MTMR14, BECN1, TOMM20, WIPI1, VDAC1                                                                                                                                                                                                                                                  |
| GOTERM_BP_DIRECT | Bicellular tight junction assembly                             | NO                        | 4     | 4,92E-02 | F11R, MPP5, PATJ, SRF                                                                                                                                                                                                                                                                       |
| GOTERM_BP_DIRECT | Small GTPase mediated signal transduction                      | NO                        | 12    | 5,57E-02 | NRAS, ARHGAP32, RABL3, RAB19, HMOX1, IFT22, RAB14, DOCK9, RAP1B, RAPGEF2, ITSN1, RHOF, GNA13, FGF18, SPOCK2, NMB, ARHGAP17, NR2E3, SP110, CXCL6, CD74, RGMB, TMEM9B, MYD88, CCL20, HLA-DRB4, SHC1, MR1, ZPR1, ANKDD1A, NRG2, PTPRK, GOLT1B, LGALS1, NDFIP2, CLIC2, DPYSL2, ARHGAP24, ANXA4, |
| GOTERM_BP_DIRECT | Signal transduction                                            | YES                       | 40    | 5,84E-02 | ITPR1, STAT3, GMFB, MAPK1, ARHGAP32, GAPVD1, ADM, TOM1L2, GRN, IGF2R, KLRC4-KLRK1, ASB2, IGFBP1                                                                                                                                                                                             |

Pathways enrichment and gene ontology analyses of transcripts modulated by miR-145-5p only in the absence of Ago2

Genes modulated with P<0.01 were considered for this analysis

| Category         | Term                                                     | Count | %       | PValue     | Genes                                         |
|------------------|----------------------------------------------------------|-------|---------|------------|-----------------------------------------------|
| KEGG_PATHWAY     | Sphingolipid signaling pathway                           | 4     | 2,7027  | 0,02584726 | GNA13, NRAS, TNF, S1PR5                       |
| KEGG_PATHWAY     | Ubiquitin mediated proteolysis                           | 4     | 2,7027  | 0,03627511 | UBE2E3, SYVN1, MAP3K1, CUL1                   |
| KEGG_PATHWAY     | Protein processing in endoplasmic reticulum              | 4     | 2,7027  | 0,06091528 | UBE2E3, EIF2AK1, SYVN1, CUL1                  |
| KEGG_PATHWAY     | Proteoglycans in cancer                                  | 4     | 2,7027  | 0,09057808 | NRAS, TNF, RDX, STAT3                         |
| GOTERM_BP_DIRECT | Positive regulation of NFAT protein import into nucleus  | 3     | 2,02703 | 0,00178325 | TNF, LACRT, PPP3CA                            |
| GOTERM_BP_DIRECT | Establishment of protein localization to plasma membrane | 3     | 2,02703 | 0,02985827 | TNF, MPP5, RDX                                |
| GOTERM_BP_DIRECT | Cell adhesion                                            | 7     | 4,72973 | 0,07574882 | CDH8, EGFL6, NUAK1, PODXL, ITGA8, PRKX, CDH11 |
