# Supplementary material for: Argonaute 2 drives miR-145-5p-dependent gene expression program in breast cancer cells
Source: PubMed Central journal article supplement (PMC6325137; doi:10.1038/s41419-018-1267-5), 2019-01-08
Supplement: 41419_2018_1267_MOESM10_ESM.pdf [file 41419_2018_1267_MOESM10_ESM.pdf]

**Supplementary Table 1: Primers used for RT-qPCR**

| <b>Gene</b> | <b>Sequence</b>                |
|-------------|--------------------------------|
| GOLM1 fw    | CAGCGTGAAAAGCGGAATC            |
| GOLM1 rev   | TCGGCCCTGTTGTGAAATA            |
| H3 fw       | GTGAAGAAACCTCATCGTTACAGGCCTGGT |
| H3 rev      | CTGCAAAGCACCAATAGCTGCACTCTGGAA |
| JAM-A fw    | TCACCGCCTATCATCTGCAT           |
| JAM-A rev   | CAGCAGTGGTAGGAAAGGGA           |
| AGO2 fw     | AGGCTGCTCTAACCCTCTTG           |
| AGO2 rev    | GCTGTGCCTTGTAACACGCT           |
| AGO1 fw     | CCGGCATCTCAAGAACACCT           |
| AGO1 rev    | CGTTCTTCACCTGCACACAC           |
| DECR1 fw    | CGGCCAGGGTTTTCTTTACT           |
| DECR1 rev   | AGCATCGCTTTTTGAAGAGG           |
| GFM2 fw     | TGACCAACTTGAGGATATTTGC         |
| GFM2 rev    | ATGGGAGGATTGATGATGGA           |
| DOCK9 fw    | GCTGCTCTTCCCTTACGATG           |
| DOCK9 rev   | GACCCTGTCGTCTCAGGATG           |
| VDAC3 fw    | GGCGTTGGTTTGAAGACCT            |
| VDAC3 rev   | GACCATGCCAAAGCCATATC           |
| ETFB fw     | GCAGAGAAGGAGAAGGTGGA           |
| ETFB rev    | CCTGTGGCCAGTCAAGAAAT           |
