# Supplementary material for: Argonaute 2 drives miR-145-5p-dependent gene expression program in breast cancer cells
Source: PubMed Central journal article supplement (PMC6325137; doi:10.1038/s41419-018-1267-5), 2019-01-08
Supplement: 41419_2018_1267_MOESM11_ESM.pdf [file 41419_2018_1267_MOESM11_ESM.pdf]

**Supplementary Table 2:** Clinical characteristics of Breast Cancer patients

| <b>Gender/<br/>Age</b> | <b>Tumor<br/>size (cm)</b> | <b>Histotype</b> | <b>Tumor<br/>grade</b> | <b>pT</b> | <b>pN</b> | <b>M</b> | <b>Stage</b> | <b>Ki67<br/>(%)</b> |
|------------------------|----------------------------|------------------|------------------------|-----------|-----------|----------|--------------|---------------------|
| F/76                   | 1,6                        | Ductal           | G3                     | T1        | 0         | x        | IA           | 80                  |
| F/68                   | 3                          | Ductal           | G3                     | T2        | x         | x        | nd           | 80                  |
| F/74                   | 4,5                        | Ductal           | G3                     | T2        | 0         | x        | IIA          | 70                  |
| F/52                   | 1,5                        | Ductal           | G3                     | T1        | 0         | x        | IA           | 5                   |
| F/46                   | 2,5                        | Ductal           | G3                     | T2        | 0         | x        | IIA          | 90                  |
| F/66                   | 2,8                        | Ductal           | G3                     | T2        | 3a        | x        | IIIC         | 50                  |
| F/68                   | 1,5                        | Ductal           | G3                     | T1        | 0         | x        | IA           | 70                  |
| F/72                   | 2,6                        | Ductal           | G3                     | T2        | 1a        | x        | IIB          | 70                  |
| F/50                   | 6                          | Ductal           | G3                     | T3        | 1a        | x        | IIIA         | 70                  |
| F/64                   | 3,9                        | Ductal           | G3                     | T4        | 2a        | x        | III3         | 80                  |
| F/63                   | 2,5                        | Ductal           | G3                     | T2        | 3a        | x        | IIIC         | 50                  |
